# Supplementary material for: Binding mechanism of uranyl to transferrin implicated by density functional theory study
Source: Royal Society of Chemistry journal article supplement (doi:10.1039/c6ra26109d), 2017-01-01
Supplement: c6ra26109d1.pdf [file c6ra26109d1.pdf]

## Supporting Information for

# Binding mechanism of uranyl to transferrin implicated by density functional theory study

Meng Wang<sup>1</sup>, Wanjian Ding<sup>\*,1</sup>, Dongqi Wang<sup>\*,2,3</sup>

<sup>1</sup>Key Laboratory of Theoretical and Computational Photochemistry, Ministry of Education, College of Chemistry, Beijing Normal University, Beijing 100875, China.

<sup>2</sup>CAS Key Laboratory of Nuclear Radiation and Nuclear Energy Techniques, Institute of High Energy Physics, Chinese Academy of Sciences, Beijing 100049, China.

<sup>3</sup>The State Key Laboratory of Molecular Reaction Dynamics in DICP, CAS, Dalian, China

E-mail: dingwanjian@bnu.edu.cn (W. Ding), dwang@ihep.ac.cn (D. Wang)

### Content

1. The full citation of Gaussian 09
2. Channel III for the first HTyr\* binding to uranyl tricarbonate following pathway YYD
3. Tables and figures
4. Coordinates and energies of stationary points

## 1. The full citation of Gaussian 09

M. J. Frisch, G. W. Trucks, H. B. Schlegel, G. E. Scuseria, M. A. Robb, J. R. Cheeseman, G. Scalmani, V. Barone, B. Mennucci, G. A. Petersson, H. Nakatsuji, M. Caricato, X. Li, H. P. Hratchian, A. F. Izmaylov, J. Bloino, G. Zheng, J. L. Sonnenberg, M. Hada, M. Ehara, K. Toyota, R. Fukuda, J. Hasegawa, M. Ishida, T. Nakajima, Y. Honda, O. Kitao, H. Nakai, T. Vreven, J. A. Montgomery, Jr., J. E. Peralta, F. Ogliaro, M. Bearpark, J. J. Heyd, E. Brothers, K. N. Kudin, V. N. Staroverov, T. Keith, R. Kobayashi, J. Normand, K. Raghavachari, A. Rendell, J. C. Burant, S. S. Iyengar, J. Tomasi, M. Cossi, N. Rega, J. M. Millam, M. Klene, J. E. Knox, J. B. Cross, V. Bakken, C. Adamo, J. Jaramillo, R. Gomperts, R. E. Stratmann, O. Yazyev, A. J. Austin, R. Cammi, C. Pomelli, J. W. Ochterski, R. L. Martin, K. Morokuma, V. G. Zakrzewski, G. A. Voth, P. Salvador, J. J. Dannenberg, S. Dapprich, A. D. Daniels, O. Farkas, J. B. Foresman, J. V. Ortiz, J. Cioslowski, and D. J. Fox, Gaussian, Inc., Wallingford CT, 2010.

## 2. Channel III for the first HTyr\* binding to uranium tricarbonate following pathway YYD (Figures S1-S3).

We also considered the first ligand coordination process of the sequence YYD beginning with channel III. The optimized structures of the stationary points along with key geometrical parameters are given in Figures S1 and S2, and the free energy profiles in Figure S3.

Two possible reaction mechanisms (denoted as mechanism III-1 in Figure S1 and III-2 in Figure S2) for Channel III are considered here, which are both five-stepped, including the change of coordination mode of carbonate from  $\kappa^2$  to  $\eta^1$  with one coordination site release (TS1/TS1'), the binding of H<sub>2</sub>O (TS2/TS2'), the proton migration (TS3/TS3'), the release of HCO<sub>3</sub><sup>-</sup> (TS4/TS4'), and the binding of HTyr\* accompanied with H<sub>2</sub>O recovery (TS5/TS5'), differing in the steps 1 and 3.

As shown in Figures S1, prior to the proton transfer from water to one of the carbonate ligands in UO<sub>2</sub>(CO<sub>3</sub>)<sub>3</sub><sup>4-</sup> (**1a**), a complex forms with the approaching water molecule bridging the two neighboring carbonate groups via two hydrogen bonds (COM1). The transition state TS1 corresponds to the coordination mode change of one carbonate from  $\kappa^2$  to  $\eta^1$ . This makes the way for the water to access the U atom, as seen from the shortening of U...O18 distance from 4.42 Å in INT1 to 2.80 Å in TS2 to 2.68 Å in INT2 to 2.48 Å in TS3 to 2.39 Å in INT3. This is accompanied by the lengthening of the U...O3 distance, and finally the HCO<sub>3</sub><sup>-</sup> is replaced by the OH<sup>-</sup> anion (INT4). The leaving of the HCO<sub>3</sub><sup>-</sup> anion gives a penta-coordinated intermediate UO<sub>2</sub>(CO<sub>3</sub>)<sub>2</sub>(OH)<sup>3-</sup> (**U-OH**) and offers room for the entry of a HTyr\* ligand. The coordination of HTyr\* to U and the proton transfer from HTyr\* to the OH<sup>-</sup> anion happen concertedly, and in the meantime, the replenished water molecule is repelled by the deprotonated Tyr\* ligand, which produces **1b**.

Mechanism III-2 is similar to mechanism III-1 except that in the former the U-O2 but not U-O4 bond broken to release a coordination site in the first step, and the proton H20 migrated to O2 atom but not to O5 atom.

These two mechanisms for Channel III have similar free energy profile. The highest relative free energy (TS4') along mechanism III-2 is a little higher than that in mechanism III-1 (9.5 kcal/mol vs. 6.8 kcal/mol), while both mechanisms are energetically accessible under physiological condition.

Compared with Channel I, the mechanism III-1 is just marginally lower in energy than Channel I with respect to the highest relative free energy, so the mechanism of Channel I for the first Tyr\* binding to uranyl tricarbonate was adopted and discussed in the main text.

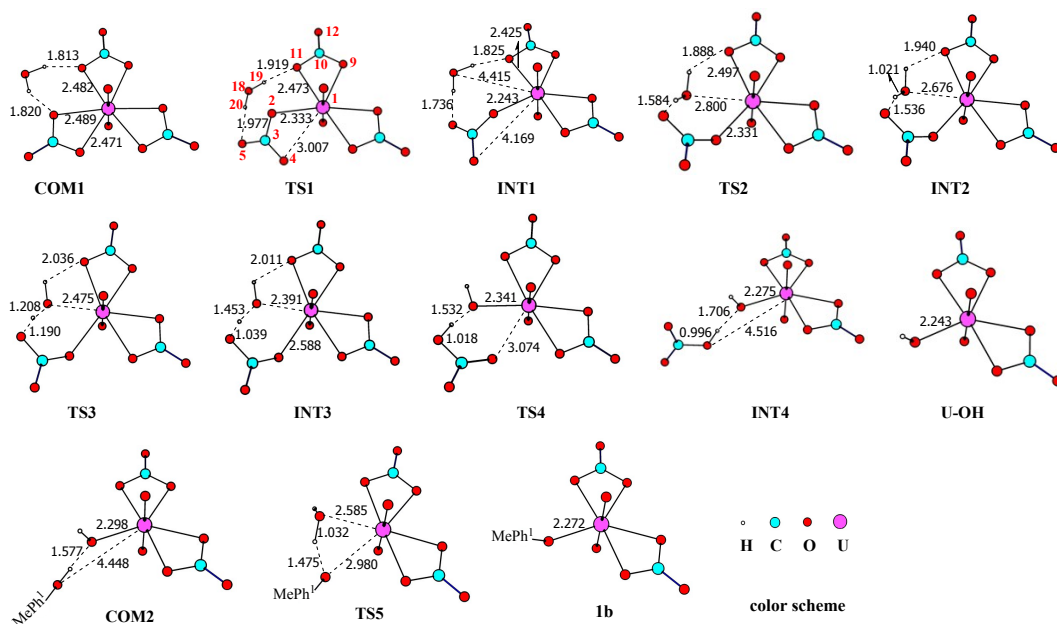

**Figure S1.** The schematic structures of stationary points following Channel III (mechanism III-1) along with the key geometrical parameters (bond lengths in Å, and bond angles and dihedral angles in degree).

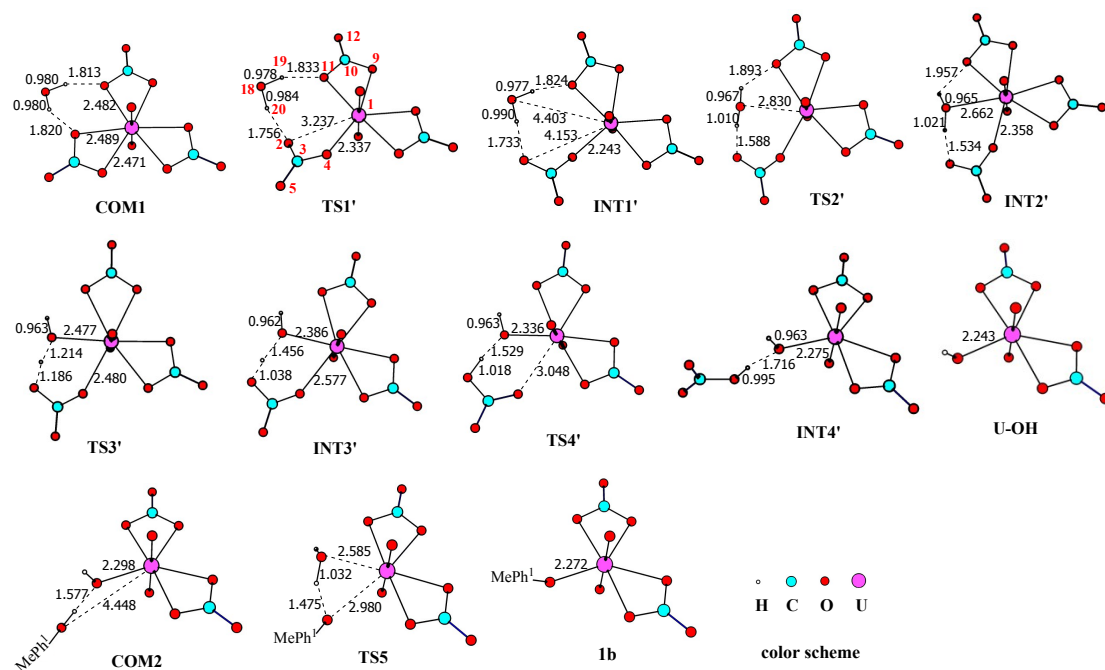

**Figure S2.** The schematic structures of the stationary points following channel III (mechanism III-2) for the first Tyr\* ligand exchange with uranium tricarbonate of the YYD pathway along with the key geometrical parameters (bond lengths in Å, and bond angles and dihedral angles in degree).

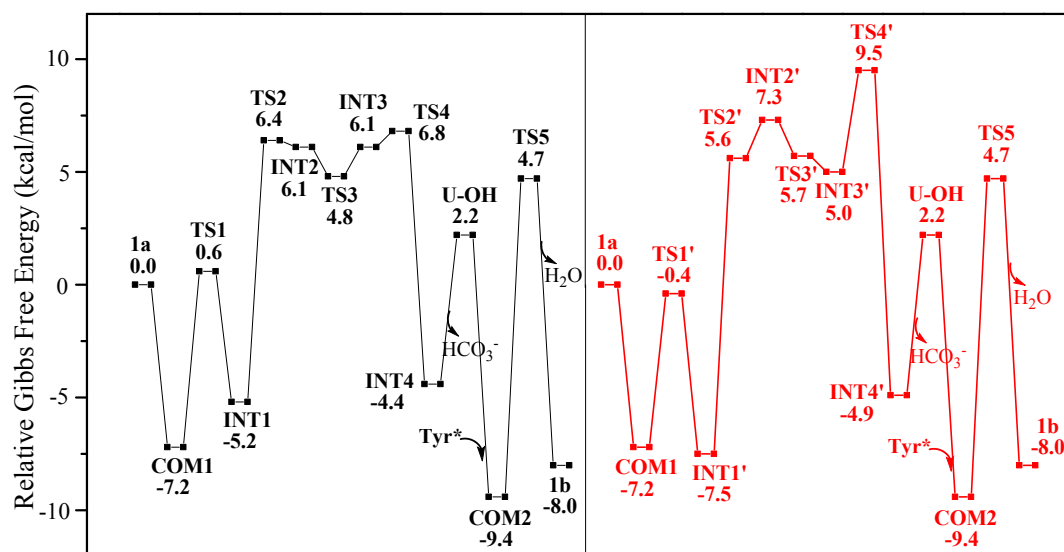

**Fi**

**Figure S3.** The Gibbs free energy profiles of mechanisms III-1(left) and III-2 (right) of channel III for the first Tyr\* ligand exchange with uranium tricarbonate following YYD pathway.

### 3. Tables and figures

**Table S1.** The energies (with ZPE correction), enthalpies, and Gibbs free energies (in Hartree at 298 K) of the substances involved in Equation 1-7 and the changes of energies ( $\Delta E$ ), nthalpies ( $\Delta H$ ), and Gibbs free energies ( $\Delta G$ ) (in kcal/mol ) for Equation 1-7.

|              | species                                               | E            | $\Delta E$ | H           | $\Delta H$ | G           | $\Delta G$ |
|--------------|-------------------------------------------------------|--------------|------------|-------------|------------|-------------|------------|
|              | <b>1a</b>                                             | -1420.02428  |            | -1420.00761 |            | -1420.04860 |            |
|              | <b>Tyr*</b>                                           | -346.76131   |            | -346.75292  |            | -346.77948  |            |
|              | <b>1b</b>                                             | -1502.16898  |            | -1502.14797 |            | -1502.20261 |            |
|              | <b>HCO<sub>3</sub><sup>-</sup></b>                    | -264.62851   |            | -264.62403  |            | -264.63823  |            |
|              | <b>H<sub>3</sub>O<sup>+</sup></b>                     | -76.82034    |            | -76.81651   |            | -76.82703   |            |
|              | <b>U-H<sub>2</sub>O</b>                               | -1232.29602  |            | -1232.28094 |            | -1232.32215 |            |
|              | <b>H<sub>2</sub>O</b>                                 | -76.445283   |            | -76.44150   |            | -76.44962   |            |
|              | <b>U-OH</b>                                           | -1231.840718 |            | -1231.82607 |            | -1231.85649 |            |
|              | <b>Asp*</b>                                           | -228.65884   |            | -228.65353  |            | -228.66978  |            |
| <b>Eq. 1</b> | <b>1a + Tyr*</b>                                      | -1766.78559  | 0.0        | -1766.76053 | 0.0        | -1766.82808 | 0.0        |
|              | <b>1b + HCO<sub>3</sub><sup>-</sup></b>               | -1766.79749  | -7.5       | -1766.77200 | -7.2       | -1766.84084 | -8.0       |
| <b>Eq. 2</b> | <b>1a + H<sub>3</sub>O<sup>+</sup></b>                | -1496.84462  | 0.0        | -1496.82412 | 0.0        | -1496.87563 | 0.0        |
|              | <b>U-H<sub>2</sub>O + HCO<sub>3</sub><sup>-</sup></b> | -1496.92453  | -50.1      | -1496.90497 | -50.7      | -1496.96038 | -53.2      |
| <b>Eq. 3</b> | <b>U-H<sub>2</sub>O + Tyr*</b>                        | -1579.05733  | 0.0        | -1579.03386 | 0.0        | -1579.10163 | 0.0        |
|              | <b>1b + H<sub>3</sub>O<sup>+</sup></b>                | -1578.98932  | 42.7       | -1578.96448 | 43.5       | -1579.02964 | 45.2       |
| <b>Eq. 4</b> | <b>1a + H<sub>2</sub>O</b>                            | -1496.469563 | 0.0        | -1496.44911 | 0.0        | -1496.49822 | 0.0        |
|              | <b>U-OH + HCO<sub>3</sub><sup>-</sup></b>             | -1496.469228 | 0.2        | -1496.45010 | -0.6       | -1496.49472 | 2.2        |
| <b>Eq. 5</b> | <b>U-OH + Tyr*</b>                                    | -1578.602028 | 0.0        | -1578.57899 | 0.0        | -1578.63597 | 0.0        |
|              | <b>1b + H<sub>2</sub>O</b>                            | -1578.614263 | -7.7       | -1578.58947 | -6.6       | -1578.65223 | -10.2      |
| <b>Eq. 6</b> | <b>1a + Asp*</b>                                      | -1648.68312  | 0.0        | -1648.66114 | 0.0        | -1648.71838 | 0.0        |
|              | <b>U-3CO<sub>3</sub>-Asp*</b>                         | -1648.76122  | -49.0      | -1648.63647 | 15.5       | -1648.69264 | 16.2       |
| <b>Eq. 7</b> | <b>U-OH + Asp*</b>                                    | -1460.49956  | 0.0        | -1460.47960 | 0.0        | -1460.52627 | 0.0        |
|              | <b>U-2CO<sub>3</sub>-Asp*</b>                         | -1460.58106  | -51.1      | -1460.46171 | 11.2       | -1460.50834 | 11.3       |

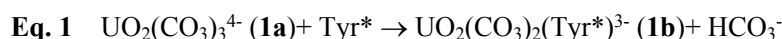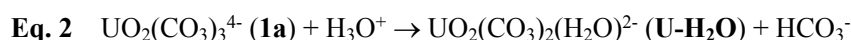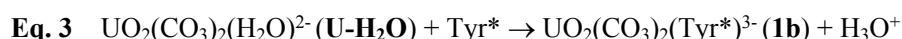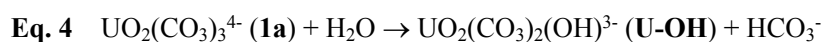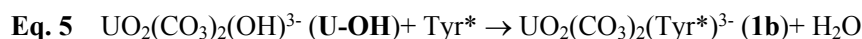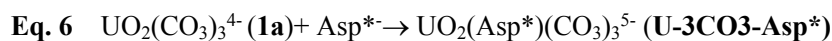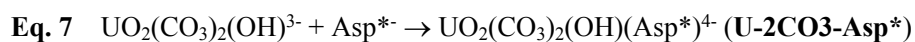

**Table S2.** The natural charge of key atoms of the stationary points involved in the ligand exchange of two CO<sub>3</sub><sup>2-</sup> by the first Tyr\* and by the second Tyr\* ligand.

|              | <b>U1</b> | <b>O2</b> | <b>C3</b>  | <b>O4</b>  | <b>O5</b>  | <b>O7</b>  |
|--------------|-----------|-----------|------------|------------|------------|------------|
| <b>1a</b>    | 1.305     | -0.740    | 0.980      | -0.740     |            |            |
| <b>COM1a</b> | 1.318     | -0.730    | 1.002      | -0.722     | -0.843     | -0.755     |
| <b>TS1a</b>  | 1.481     | -0.752    | 0.996      | -0.819     | -0.864     | -0.759     |
| <b>INT1a</b> | 1.433     | -0.729    | 1.010      | -0.841     | -0.866     | -0.755     |
| <b>TS2a</b>  | 1.460     | -0.719    | 1.024      | -0.797     | -0.799     | -0.825     |
| <b>INT2a</b> | 1.466     | -0.713    | 1.026      | -0.782     | -0.785     | -0.855     |
| <b>TS3a</b>  | 1.457     | -0.707    | 1.015      | -0.800     | -0.796     | -0.782     |
| <b>INT3a</b> | 1.362     | -0.703    | 1.001      | -0.817     | -0.799     | -0.729     |
| <b>TS4a</b>  | 1.418     | -0.732    | 0.985      | -0.831     | -0.808     | -0.728     |
| <b>INT4a</b> | 1.461     | -0.845    | 0.969      | -0.842     | -0.807     | -0.726     |
|              | <b>U1</b> | <b>O9</b> | <b>C10</b> | <b>O11</b> | <b>O12</b> | <b>O14</b> |
| <b>COM1b</b> | 1.450     | -0.729    | 1.007      | -0.742     | -0.822     | -0.751     |
| <b>TS1b</b>  | 1.657     | -0.827    | 1.003      | -0.761     | -0.856     | -0.756     |
| <b>INT1b</b> | 1.660     | -0.834    | 1.008      | -0.754     | -0.858     | -0.755     |
| <b>TS2b</b>  | 1.665     | -0.783    | 1.025      | -0.732     | -0.790     | -0.827     |
| <b>INT2b</b> | 1.667     | -0.780    | 1.026      | -0.731     | -0.787     | -0.833     |
| <b>TS3b</b>  | 1.643     | -0.778    | 1.025      | -0.727     | -0.783     | -0.828     |
| <b>INT3b</b> | 1.411     | -0.779    | 1.014      | -0.708     | -0.777     | -0.777     |
| <b>TS4b</b>  | 1.640     | -0.834    | 0.973      | -0.807     | -0.805     | -0.741     |
| <b>INT4b</b> | 1.686     | -0.840    | 0.969      | -0.845     | -0.806     | -0.746     |

**Table S3.** The Mayer atomic bond order of key bonds of the stationary points involved in the ligand exchange of two CO<sub>3</sub><sup>2-</sup> by the first Tyr\* and by the second Tyr\* ligand.

|              | <b>U1-O2</b> | <b>U1-O4</b> | <b>U1-O7</b> | <b>O5-H6</b> | <b>O7-H6</b> |
|--------------|--------------|--------------|--------------|--------------|--------------|
| <b>COM1a</b> | 0.447        | 0.401        | -0.001       | 0.147        | 0.520        |
| <b>TS1a</b>  | 0.489        | 0.076        | 0.002        | 0.136        | 0.526        |
| <b>INT1a</b> | 0.433        | -0.005       | -0.005       | 0.123        | 0.568        |
| <b>TS2a</b>  | 0.396        | -0.007       | -0.001       | 0.378        | 0.235        |
| <b>INT2a</b> | 0.373        | -0.004       | 0.001        | 0.515        | 0.177        |

|              |              |               |               |                |                |
|--------------|--------------|---------------|---------------|----------------|----------------|
| <b>TS3a</b>  | 0.447        | 0.016         | 0.092         | 0.622          | 0.300          |
| <b>INT3a</b> | 0.350        | 0.019         | 0.366         | 0.744          | 0.249          |
| <b>TS4a</b>  | 0.179        | 0.012         | 0.359         | 0.773          | 0.218          |
| <b>INT4a</b> | 0.002        | 0.002         | 0.385         | 0.820          | 0.044          |
|              | <b>U1-O9</b> | <b>U1-O11</b> | <b>U1-O14</b> | <b>O12-H13</b> | <b>O14-H13</b> |
| <b>COM1b</b> | 0.364        | 0.435         | 0.000         | 0.136          | 0.546          |
| <b>TS1b</b>  | 0.027        | 0.511         | 0.003         | 0.119          | 0.552          |
| <b>INT1b</b> | 0.000        | 0.509         | 0.001         | 0.124          | 0.556          |
| <b>TS2b</b>  | -0.002       | 0.360         | 0.003         | 0.446          | 0.236          |
| <b>INT2b</b> | -0.003       | 0.361         | 0.017         | 0.473          | 0.221          |
| <b>TS3b</b>  | 0.003        | 0.349         | 0.063         | 0.509          | 0.235          |
| <b>INT3b</b> | 0.013        | 0.332         | 0.341         | 0.712          | 0.211          |
| <b>TS4b</b>  | 0.001        | 0.053         | 0.447         | 0.784          | 0.111          |
| <b>INT4b</b> | 0.002        | 0.000         | 0.428         | 0.817          | 0.044          |

**Table S4.** The total energies ( $E'$ ), zero-point energy corrected total energies ( $E$ ), enthalpies ( $H$ ), and Gibbs free energies ( $G$ ) (in Hartree at 298 K) of the stationary points following pathway YYD and the corresponding relative energies ( $\Delta E'$ ,  $\Delta E$ ,  $\Delta H$ , and  $\Delta G$  in kcal/mol) (corresponding to Figure 3).

| species                            | $E'$        | $\Delta E'$ | $E$         | $\Delta E$ | $H$         | $\Delta H$ | $G$         | $\Delta G$ |
|------------------------------------|-------------|-------------|-------------|------------|-------------|------------|-------------|------------|
| <b>1a</b>                          | -1420.07717 |             | -1420.02428 |            | -1420.00761 |            | -1420.04860 |            |
| <b>HTyr*</b>                       | -346.89242  |             | -346.76131  |            | -346.75292  |            | -346.77948  |            |
| <b>1a+ HTyr*</b>                   | -1766.96959 | 0.0         | -1766.78559 | 0.0        | -1766.76053 | 0.0        | -1766.82808 | 0.0        |
| <b>COM1a</b>                       | -1766.98664 | -10.7       | -1766.80161 | -10.1      | -1766.77599 | -9.7       | -1766.83984 | -7.4       |
| <b>TS1a</b>                        | -1766.97688 | -4.6        | -1766.79294 | -4.6       | -1766.76793 | -4.6       | -1766.83201 | -2.5       |
| <b>INT1a</b>                       | -1766.98183 | -7.7        | -1766.79782 | -7.7       | -1766.77194 | -7.2       | -1766.83916 | -7.0       |
| <b>TS2a</b>                        | -1766.97838 | -5.5        | -1766.79827 | -8.0       | -1766.77284 | -7.7       | -1766.83683 | -5.5       |
| <b>INT2a</b>                       | -1766.97856 | -5.6        | -1766.79603 | -6.6       | -1766.77010 | -6.0       | -1766.83592 | -4.9       |
| <b>TS3a</b>                        | -1766.96271 | 4.3         | -1766.77886 | 4.2        | -1766.75410 | 4.0        | -1766.81499 | 8.2        |
| <b>INT3a</b>                       | -1766.96765 | 1.2         | -1766.78243 | 2.0        | -1766.75689 | 2.3        | -1766.82087 | 4.5        |
| <b>TS4a</b>                        | -1766.96608 | 2.2         | -1766.78109 | 2.8        | -1766.75614 | 2.8        | -1766.81811 | 6.3        |
| <b>INT4a</b>                       | -1766.98361 | -8.8        | -1766.79937 | -8.7       | -1766.77297 | -7.8       | -1766.84081 | -8.0       |
| <b>1b</b>                          | -1502.32600 |             | -1502.16898 |            | -1502.14797 |            | -1502.20261 |            |
| <b>HCO<sub>3</sub><sup>-</sup></b> | -264.65443  |             | -264.62851  |            | -264.62403  |            | -264.63823  |            |



|                                                                          |             |       |             |       |             |       |             |       |
|--------------------------------------------------------------------------|-------------|-------|-------------|-------|-------------|-------|-------------|-------|
| <b>1b+ HCO<sub>3</sub><sup>-</sup></b>                                   | -1766.98043 | -6.8  | -1766.79749 | -7.5  | -1766.77200 | -7.2  | -1766.84084 | -8.0  |
| <b>1a+2HTyr*<br/>-HCO<sub>3</sub><sup>-</sup></b>                        | -1849.20760 | 0.0   | -1848.91838 | 0.0   | -1848.88943 | 0.0   | -1848.96933 | 0.0   |
| <b>COM1b</b>                                                             | -1849.23398 | -16.6 | -1848.94502 | -16.7 | -1848.91479 | -15.9 | -1848.99171 | -14.0 |
| <b>TS1b</b>                                                              | -1849.21929 | -7.3  | -1848.93110 | -8.0  | -1848.90155 | -7.6  | -1848.97644 | -4.5  |
| <b>INT1b</b>                                                             | -1849.21982 | -7.7  | -1848.93171 | -8.4  | -1848.90126 | -7.4  | -1848.97839 | -5.7  |
| <b>TS2b</b>                                                              | -1849.21572 | -5.1  | -1848.93041 | -7.5  | -1848.90070 | -7.1  | -1848.97555 | -3.9  |
| <b>INT2b</b>                                                             | -1849.21572 | -5.1  | -1848.92969 | -7.1  | -1848.89928 | -6.2  | -1848.97535 | -3.8  |
| <b>TS3b</b>                                                              | -1849.21462 | -4.4  | -1848.92785 | -5.9  | -1848.89847 | -5.7  | -1848.97137 | -1.3  |
| <b>INT3b</b>                                                             | -1849.22970 | -13.9 | -1848.94009 | -13.6 | -1848.91014 | -13.0 | -1848.98430 | -9.4  |
| <b>TS4b</b>                                                              | -1849.21786 | -6.4  | -1848.92890 | -6.6  | -1848.89919 | -6.1  | -1848.97406 | -3.0  |
| <b>INT4b</b>                                                             | -1849.22104 | -8.4  | -1848.93232 | -8.7  | -1848.90164 | -7.7  | -1848.97921 | -6.2  |
| <b>1c</b>                                                                | -1661.03359 |       | -1660.74744 |       | -1660.71917 |       | -1660.79039 |       |
| <b>1c-H<sub>2</sub>O+<br/>HCO<sub>3</sub><sup>-</sup></b>                | -1849.22154 | -8.7  | -1848.93067 | -7.7  | -1848.90170 | -7.7  | -1848.97900 | -6.1  |
| <b>Asp*</b>                                                              | -228.70704  |       | -228.65884  |       | -228.65353  |       | -228.66978  |       |
| <b>H<sub>2</sub>O</b>                                                    | -76.46648   |       | -76.445283  |       | -76.44150   |       | -76.44962   |       |
| <b>1a+2HTyr*+Asp*<br/>+H<sub>2</sub>O - 2HCO<sub>3</sub><sup>-</sup></b> | -1889.72668 | 0.0   | -1889.39398 | 0.0   | -1889.36043 | 0.0   |             | 0.0   |
| <b>TS1c</b>                                                              | -1889.73811 | -7.2  | -1889.40313 | -5.7  | -1889.36926 | -5.5  | -1889.45264 | -1.4  |
| <b>INT1c</b>                                                             | -1889.75253 | -16.2 | -1889.41716 | -14.5 | -1889.38280 | -14.0 | -1889.46694 | -10.3 |
| <b>Prod</b>                                                              | -1813.27556 |       | -1812.96464 |       | -1812.93323 |       | -1813.01227 |       |
| <b>Prod+H<sub>2</sub>O</b>                                               | -1889.74204 | -9.6  | -1889.40992 | -10.0 | -1889.37473 | -9.0  | -1889.46189 | -7.2  |

**Table S5.** The total energies (E'), zero-point energy corrected total energies (E), enthalpies (H), and Gibbs free energies (G) (in Hartree at 298 K) of the stationary points following pathway YDY and the corresponding relative energies ( $\Delta E'$ ,  $\Delta E$ ,  $\Delta H$ , and  $\Delta G$  in kcal/mol) (corresponding to Figure 6).

| species                                | E'          | $\Delta E'$ | E           | $\Delta E$ | H           | $\Delta H$ | G           | $\Delta G$ |
|----------------------------------------|-------------|-------------|-------------|------------|-------------|------------|-------------|------------|
| <b>1a</b>                              | -1420.07717 |             | -1420.02428 |            | -1420.00761 |            | -1420.04860 |            |
| <b>HTyr*</b>                           | -346.89242  |             | -346.76131  |            | -346.75292  |            | -346.77948  |            |
| <b>1a+ HTyr*</b>                       | -1766.96959 | 0.0         | -1766.78559 | 0.0        | -1766.76053 | 0.0        | -1766.82808 | 0.0        |
| <b>1b</b>                              | -1502.32600 |             | -1502.16898 |            | -1502.14797 |            | -1502.20261 |            |
| <b>HCO<sub>3</sub><sup>-</sup></b>     | -264.65443  |             | -264.62851  |            | -264.62403  |            | -264.63823  |            |
| <b>1b+ HCO<sub>3</sub><sup>-</sup></b> | -1766.98043 | -6.8        | -1766.79749 | -7.5       | -1766.77200 | -7.2       | -1766.84084 | -8.0       |
| <b>Asp*</b>                            | -228.70704  |             | -228.65884  |            | -228.65353  |            | -228.66978  |            |

|                                                          |             |       |             |       |             |      |             |      |
|----------------------------------------------------------|-------------|-------|-------------|-------|-------------|------|-------------|------|
| <b>1a+ HTyr*+<br/>Asp*- HCO<sub>3</sub><sup>-</sup></b>  | -1731.02220 | 0.0   | -1730.81592 | 0.0   | -1730.79003 | 0.0  | -1730.85963 | 0.0  |
| <b>TS1b'</b>                                             | -1731.00736 | 9.3   | -1730.80085 | 9.5   | -1730.77460 | 9.7  | -1730.84042 | 12.1 |
| <b>INT1b'</b>                                            | -1731.00928 | 8.1   | -1730.80296 | 8.1   | -1730.77563 | 9.0  | -1730.84412 | 9.7  |
| <b>1a+ 2HTyr*+<br/>Asp*- HCO<sub>3</sub><sup>-</sup></b> | -2077.91462 | 0.0   | -2077.57723 | 0.0   | -2077.54295 | 0.0  | -2077.63911 | 0.0  |
| <b>COM1c'</b>                                            | -2077.91936 | -3.0  | -2077.58040 | -2.0  | -2077.54452 | -1.0 | -2077.63263 | 4.0  |
| <b>TS1c'</b>                                             | -2077.91494 | -0.2  | -2077.57690 | 0.2   | -2077.54162 | 0.8  | -2077.62932 | 6.1  |
| <b>INT1c'</b>                                            | -2077.93034 | -9.9  | -2077.59222 | -9.4  | -2077.55621 | -8.3 | -2077.64420 | -3.2 |
| <b>TS2c'</b>                                             | -2077.92834 | -8.6  | -2077.59404 | -10.5 | -2077.55842 | -9.7 | -2077.64468 | -3.5 |
| <b>INT2c'</b>                                            | -2077.92973 | -9.5  | -2077.59231 | -9.5  | -2077.55609 | -8.2 | -2077.64518 | -3.8 |
| <b>TS3c'</b>                                             | -2077.91391 | 0.4   | -2077.57583 | 0.9   | -2077.54023 | 1.7  | -2077.62810 | 6.9  |
| <b>INT3c'</b>                                            | -2077.93330 | -11.7 | -2077.59435 | -10.7 | -2077.55802 | -9.5 | -2077.64682 | -4.9 |
| <b>Prod</b>                                              | -1813.27556 |       | -1812.96464 |       | -1812.93323 |      | -1813.01227 |      |
| <b>Prod+ HCO<sub>3</sub><sup>-</sup></b>                 | -2077.92999 | -9.6  | -2077.59315 | -10.0 | -2077.55726 | -9.0 | -2077.65050 | -7.2 |

**Table S6.** The total energies (E'), zero-point energy corrected total energies (E), enthalpies (H), and Gibbs free energies (G) (in Hartree at 298 K) of the stationary points following mechanism III-1 and III-2 of channel III for the first Tyr\* ligand exchange with uranium tricarbonat following YYD pathway and the corresponding relative energies ( $\Delta E'$ ,  $\Delta E$ ,  $\Delta H$ , and  $\Delta G$  in kcal/mol) (corresponding to Figure S3).

| species                    | E'          | $\Delta E'$ | E            | $\Delta E$ | H           | $\Delta H$ | G           | $\Delta G$ |
|----------------------------|-------------|-------------|--------------|------------|-------------|------------|-------------|------------|
| <b>1a</b>                  | -1420.07717 |             | -1420.02428  |            | -1420.00761 |            | -1420.04860 |            |
| <b>H<sub>2</sub>O</b>      | -76.46648   |             | -76.445283   |            | -76.44150   |            | -76.44962   |            |
| <b>1a + H<sub>2</sub>O</b> | -1496.54365 | 0.0         | -1496.469563 | 0.0        | -1496.44911 | 0.0        | -1496.49822 | 0.0        |
| <b>COM1</b>                | -1496.56023 | -10.4       | -1496.48219  | -7.9       | -1496.46299 | -8.7       | -1496.50963 | -7.2       |
| <b>TS1</b>                 | -1496.54753 | -2.4        | -1496.46993  | -0.2       | -1496.45139 | -1.4       | -1496.49727 | 0.6        |
| <b>INT1</b>                | -1496.55820 | -9.1        | -1496.48081  | -7.1       | -1496.46145 | -7.7       | -1496.50647 | -5.2       |
| <b>TS2</b>                 | -1496.53912 | 2.8         | -1496.46182  | 4.9        | -1496.44342 | 3.6        | -1496.48802 | 6.4        |
| <b>INT2</b>                | -1496.53926 | 2.8         | -1496.46172  | 4.9        | -1496.44281 | 4.0        | -1496.48850 | 6.1        |
| <b>TS3</b>                 | -1496.53695 | 4.2         | -1496.46341  | 3.9        | -1496.44478 | 2.7        | -1496.49061 | 4.8        |
| <b>INT3</b>                | -1496.53808 | 3.5         | -1496.46100  | 5.4        | -1496.44204 | 4.4        | -1496.48847 | 6.1        |
| <b>TS4</b>                 | -1496.53652 | 4.5         | -1496.45929  | 6.4        | -1496.44114 | 5.0        | -1496.48745 | 6.8        |
| <b>INT4</b>                | -1496.55155 | -5.0        | -1496.47486  | -3.3       | -1496.45523 | -3.8       | -1496.50529 | -4.4       |
| <b>U-OH</b>                | -1231.88969 |             | -1231.840718 |            | -1231.82607 |            | -1231.85649 |            |

|                                                                  |             |       |              |      |             |      |             |      |
|------------------------------------------------------------------|-------------|-------|--------------|------|-------------|------|-------------|------|
| <b>HCO<sub>3</sub><sup>-</sup></b>                               | -264.65443  |       | -264.62851   |      | -264.62403  |      | -264.63823  |      |
| <b>U-OH + HCO<sub>3</sub><sup>-</sup></b>                        | -1496.54412 | -0.3  | -1496.46923  | 0.2  | -1496.45010 | -0.6 | -1496.49472 | 2.2  |
| <b>HTyr*</b>                                                     | -346.89242  |       | -346.76131   |      | -346.75292  |      | -346.77948  |      |
| <b>1a + H<sub>2</sub>O + HTyr* - HCO<sub>3</sub><sup>-</sup></b> | -1578.78164 | 0.0   | -1578.602363 | 0.0  | -1578.57800 | 0.0  | -1578.63947 | 0.0  |
| <b>COM2</b>                                                      | -1578.79839 | -10.5 | -1578.61687  | -9.1 | -1578.59329 | -9.6 | -1578.65452 | -9.4 |
| <b>TS5</b>                                                       | -1578.77782 | 2.4   | -1578.59669  | 3.6  | -1578.57427 | 2.3  | -1578.63192 | 4.7  |
| <b>1b</b>                                                        | -1502.32600 |       | -1502.16898  |      | -1502.14797 |      | -1502.20261 |      |
| <b>1b + H<sub>2</sub>O</b>                                       | -1578.79248 | -6.8  | -1578.61426  | -7.5 | -1578.58947 | -7.2 | -1578.65223 | -8.0 |
| <b>TS1'</b>                                                      | -1496.54965 | -3.8  | -1496.47252  | -1.9 | -1496.45381 | -2.9 | -1496.49893 | -0.4 |
| <b>INT1'</b>                                                     | -1496.55819 | -9.1  | -1496.48077  | -7.0 | -1496.46146 | -7.7 | -1496.51010 | -7.5 |
| <b>TS2'</b>                                                      | -1496.53905 | 2.9   | -1496.46164  | 5.0  | -1496.44332 | 3.6  | -1496.48935 | 5.6  |
| <b>INT2'</b>                                                     | -1496.53924 | 2.8   | -1496.46179  | 4.9  | -1496.44276 | 4.0  | -1496.48653 | 7.3  |
| <b>TS3'</b>                                                      | -1496.53708 | 4.1   | -1496.46337  | 3.9  | -1496.44489 | 2.6  | -1496.48912 | 5.7  |
| <b>INT3'</b>                                                     | -1496.53812 | 3.5   | -1496.46132  | 5.2  | -1496.44221 | 4.3  | -1496.49020 | 5.0  |
| <b>TS4'</b>                                                      | -1496.53640 | 4.5   | -1496.45943  | 6.4  | -1496.44107 | 5.0  | -1496.48308 | 9.5  |
| <b>INT4'</b>                                                     | -1496.55150 | -4.9  | -1496.47480  | -3.3 | -1496.45517 | -3.8 | -1496.50605 | -4.9 |

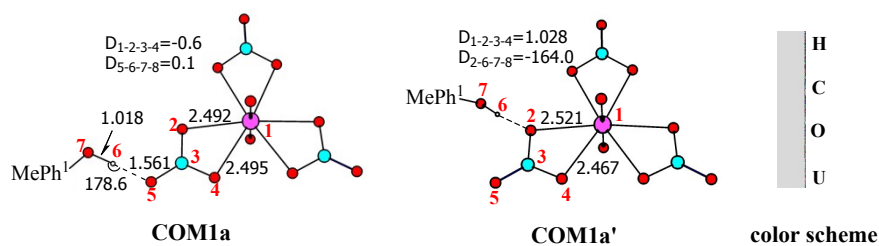

| species       | E            | $\Delta E$ | H            | $\Delta H$ | G            | $\Delta G$ |
|---------------|--------------|------------|--------------|------------|--------------|------------|
| <b>COM1a</b>  | -1766.801608 | 0.0        | -1766.775988 | 0.0        | -1766.839840 | 0.0        |
| <b>COM1a'</b> | -1766.799484 | 1.3        | -1766.773945 | 1.3        | -1766.837300 | 1.6        |

**Figure S4.** The schematic structures of COM1a and COM1a' with the key geometrical parameters (bond lengths in Å, and bond angles and dihedral angles in degree). The energies (with ZPE correction), enthalpies, and Gibbs free energies (in Hartree at 298 K) of these two structures and the corresponding relative values (in kcal/mol) are listed in the followed table. The aromatic C atom of p-cresol that is bonded to its hydroxyl group is numbered as 8.

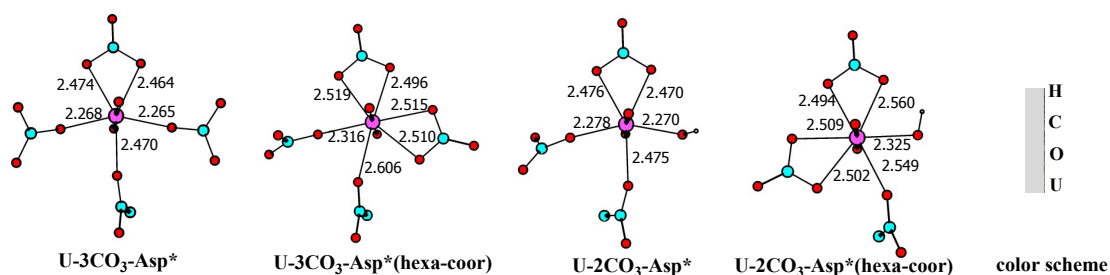

| species                             | E            | $\Delta E$ | H            | $\Delta H$ | G            | $\Delta G$ |
|-------------------------------------|--------------|------------|--------------|------------|--------------|------------|
| U-3CO <sub>3</sub> -Asp*            | -1648.659281 | 0.0        | -1648.636469 | 0.0        | -1648.692640 | 0.0        |
| U-3CO <sub>3</sub> -Asp*(hexa-coor) | -1648.647071 | 7.7        | -1648.624257 | 7.7        | -1648.680090 | 7.9        |
| U-2CO <sub>3</sub> -Asp*            | -1460.48229  | 0.0        | -1460.461705 | 0.0        | -1460.50834  | 0.0        |
| U-2CO <sub>3</sub> -Asp*(hexa-coor) | -1460.474246 | 5.0        | -1460.453974 | 4.9        | -1460.50212  | 3.9        |

**Figure S5.** The schematic structures of penta- and hexa-coordinated (in the equatorial plane) U-3CO<sub>3</sub>-Asp\* and U-2CO<sub>3</sub>-Asp\* with the key geometrical parameters (bond lengths in Å). The energies (with ZPE correction), enthalpies, and Gibbs free energies (in Hartree at 298 K) of these structures and the corresponding relative values (in kcal/mol) are listed in the followed table.

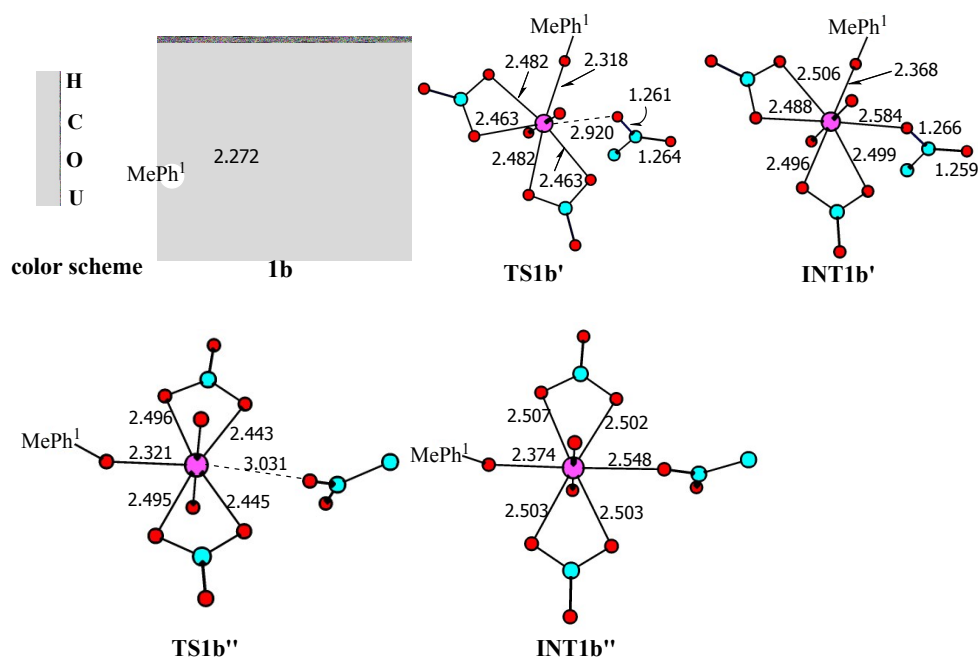

**Figure S6.** The schematic structures of the stationary points involved in Asp\* binding to

uranium of 1b in the YDY pathway along with the key geometrical parameters (bond length in Å, and bond angle and dihedral angle in degree). There are two possible attacking sites, i. e., between Tyr\* and carbonate groups (top), and between two carbonate groups (below).

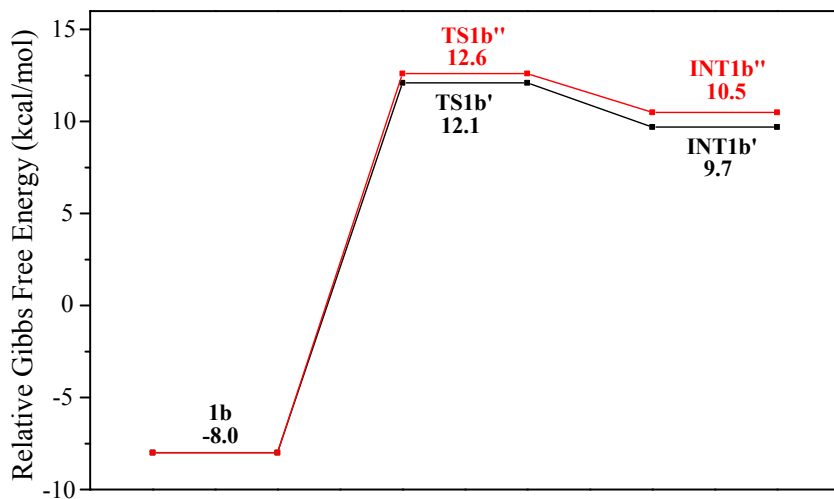

**Figure S7.** The Gibbs free energy profiles for the Asp\* binding to uranium of 1b in the YDY pathway. There are two possible attacking sites, i. e., between Tyr\* and carbonate groups (black), and between two carbonate groups (red).

## 4. Coordinates and energies of stationary points

### 1a

E(B3LYP)= -1420.077172 Hartree

Zero-point correction= 0.052894(Hartree/Particle)

Sum of electronic and zero-point Energies= -1420.024278 Hartree

Sum of electronic and thermal Enthalpies= -1420.00761 Hartree

Sum of electronic and thermal Free Energies= -1420.04860 Hartree

| Center<br>Number | Atomic<br>number | Coordinates(Angstroms) |           |           |
|------------------|------------------|------------------------|-----------|-----------|
|                  |                  | x                      | y         | z         |
| 1                | 92               | -0.000494              | 0.000219  | -0.000058 |
| 2                | 8                | 0.589726               | 2.396605  | 0.000057  |
| 3                | 8                | -1.986685              | 1.462434  | 0.000124  |
| 4                | 8                | 2.260373               | 0.986672  | 0.000237  |
| 5                | 8                | -2.370135              | -0.690224 | -0.000688 |
| 6                | 8                | 1.780813               | -1.704709 | 0.000485  |
| 7                | 8                | -0.273095              | -2.45245  | 0.00026   |
| 8                | 6                | -2.885811              | 0.512116  | -0.000092 |
| 9                | 6                | 1.88879                | 2.240936  | 0.000009  |
| 10               | 6                | 0.999886               | -2.75405  | 0.000507  |
| 11               | 8                | 1.431074               | -3.935047 | -0.000381 |
| 12               | 8                | 2.700316               | 3.201287  | 0.000005  |
| 13               | 8                | -4.123879              | 0.732811  | 0.000389  |
| 14               | 8                | -0.002158              | 0.000506  | -1.818329 |
| 15               | 8                | -0.002818              | 0.000344  | 1.818193  |

### Tyr\*

E(B3LYP)= -346.8924241Hartree

Zero-point correction= 0.131119 (Hartree/Particle)

Sum of electronic and zero-point Energies= -346.761305 Hartree

Sum of electronic and thermal Enthalpies = -346.752924 Hartree

Sum of electronic and thermal Free Energies= -346.779480 Hartree

| Center<br>Number | Atomic<br>number | Coordinates(Angstroms) |           |           |
|------------------|------------------|------------------------|-----------|-----------|
|                  |                  | x                      | y         | z         |
| 1                | 6                | 1.434045               | 0.014563  | 0.000011  |
| 2                | 6                | 0.727704               | 1.223546  | 0.000001  |
| 3                | 6                | 0.750365               | -1.205452 | -0.00001  |
| 4                | 1                | 1.274467               | 2.16051   | -0.000028 |
| 5                | 1                | 1.295633               | -2.145162 | -0.000038 |
| 6                | 6                | -0.670438              | 1.204139  | -0.00001  |
| 7                | 6                | -0.653155              | -1.206867 | 0.000003  |

|    |   |           |           |           |
|----|---|-----------|-----------|-----------|
| 8  | 1 | -1.211984 | 2.146401  | -0.000022 |
| 9  | 1 | -1.178379 | -2.157945 | -0.000025 |
| 10 | 6 | -1.388919 | -0.009337 | 0.000009  |
| 11 | 6 | -2.903502 | -0.015296 | 0.000003  |
| 12 | 1 | -3.306765 | 0.497528  | 0.882587  |
| 13 | 1 | -3.306765 | 0.497578  | -0.882547 |
| 14 | 1 | -3.29462  | -1.037743 | -0.000017 |
| 15 | 8 | 2.835858  | 0.098338  | 0.000005  |
| 16 | 1 | 3.264957  | -0.779645 | 0.000014  |

### H<sub>3</sub>O<sup>+</sup>

E(B3LYP)= -76.8552263 Hartree

Zero-point correction= 0.034885 (Hartree/Particle)

Sum of electronic and zero-point Energies= -76.820342 Hartree

Sum of electronic and thermal Enthalpies= -76.816513 Hartree

Sum of electronic and thermal Free Energies= -76.827030 Hartree

| Center Number | Atomic number | Coordinates(Angstroms) |           |           |
|---------------|---------------|------------------------|-----------|-----------|
|               |               | x                      | y         | z         |
| 1             | 8             | 0.00000                | 0.00000   | 0.083075  |
| 2             | 1             | 0.00000                | 0.929627  | -0.221533 |
| 3             | 1             | -0.80508               | -0.464813 | -0.221533 |
| 4             | 1             | 0.80508                | -0.464813 | -0.221533 |

### HCO<sub>3</sub><sup>-</sup>

E(B3LYP)= -264.6544267 Hartree

Zero-point correction= 0.025915 (Hartree/Particle)

Sum of electronic and zero-point Energies= -264.628512 Hartree

Sum of electronic and thermal Enthalpies= -264.624030 Hartree

Sum of electronic and thermal Free Energies= -264.638230 Hartree

| Center Number | Atomic number | Coordinates(Angstroms) |           |         |
|---------------|---------------|------------------------|-----------|---------|
|               |               | x                      | y         | z       |
| 1             | 8             | 1.02429                | 0.85776   | 0.00000 |
| 2             | 6             | 0.00000                | 0.15197   | 0.00000 |
| 3             | 8             | -1.208264              | 0.476207  | 0.00000 |
| 4             | 8             | 0.259395               | -1.238913 | 0.00000 |
| 5             | 1             | -0.60339               | -1.672271 | 0.00000 |

### U-H<sub>2</sub>O

E(B3LYP)= -1232.3580936 Hartree

Zero-point correction= 0.062077 (Hartree/Particle)

Sum of electronic and zero-point Energies= -1232.296016 Hartree

Sum of electronic and thermal Enthalpies= -1232.280939 Hartree

Sum of electronic and thermal Free Energies= -1232.322150 Hartree

| Center<br>Number | Atomic<br>number | Coordinates(Angstroms) |           |           |
|------------------|------------------|------------------------|-----------|-----------|
|                  |                  | x                      | y         | z         |
| 1                | 92               | 0.01139                | -0.09929  | 0.011469  |
| 2                | 8                | -2.20948               | 0.872441  | 0.004895  |
| 3                | 8                | -2.026934              | -1.309952 | -0.020832 |
| 4                | 8                | 2.057554               | -1.282255 | -0.021465 |
| 5                | 8                | 2.196125               | 0.905291  | 0.001138  |
| 6                | 6                | -2.848594              | -0.27728  | -0.025273 |
| 7                | 6                | 2.857635               | -0.230565 | -0.024543 |
| 8                | 8                | 4.097299               | -0.313153 | -0.048915 |
| 9                | 8                | -4.085917              | -0.38356  | -0.054481 |
| 10               | 8                | 0.008452               | -0.096479 | 1.812666  |
| 11               | 8                | 0.007443               | -0.036861 | -1.787644 |
| 12               | 8                | -0.117137              | 2.460073  | 0.097213  |
| 13               | 1                | 0.496827               | 2.971084  | -0.443366 |
| 14               | 1                | -1.018415              | 2.686324  | -0.173426 |

**COM1a**

E(B3LYP)= -1766.986639 Hartree

Zero-point correction= 0.185031 (Hartree/Particle)

Sum of electronic and zero-point Energies= -1766.801608 Hartree

Sum of electronic and thermal Enthalpies = -1766.775988 Hartree

Sum of electronic and thermal Free Energies= -1766.839840 Hartree

| Center<br>Number | Atomic<br>number | Coordinates(Angstroms) |           |           |
|------------------|------------------|------------------------|-----------|-----------|
|                  |                  | x                      | y         | z         |
| 1                | 92               | 1.934159               | 0.023408  | -0.000502 |
| 2                | 8                | -0.474846              | -0.615455 | -0.020818 |
| 3                | 8                | -0.052325              | 1.533063  | -0.026471 |
| 4                | 8                | 2.554019               | 2.402422  | -0.004315 |
| 5                | 8                | 4.203809               | 0.969100  | 0.022592  |
| 6                | 6                | -0.94498               | 0.593466  | -0.029853 |
| 7                | 6                | 3.851587               | 2.229585  | 0.01426   |
| 8                | 8                | 4.674783               | 3.178224  | 0.023456  |
| 9                | 8                | -2.194635              | 0.844717  | -0.041171 |
| 10               | 8                | 1.942712               | 0.019002  | -1.815752 |
| 11               | 8                | 1.902433               | 0.030811  | 1.814609  |
| 12               | 6                | -6.272533              | -1.471869 | -0.002391 |
| 13               | 6                | -7.587399              | -1.014697 | 0.006822  |
| 14               | 6                | -5.202811              | -0.564504 | -0.011399 |
| 15               | 1                | -8.395633              | -1.740342 | 0.010581  |
| 16               | 6                | -7.890658              | 0.35363   | 0.009035  |
| 17               | 6                | -5.490282              | 0.808542  | -0.013854 |



|    |   |           |           |           |
|----|---|-----------|-----------|-----------|
| 18 | 1 | -4.673966 | 1.52142   | -0.026734 |
| 19 | 6 | -6.814868 | 1.247645  | -0.004581 |
| 20 | 1 | -7.010742 | 2.316008  | -0.009794 |
| 21 | 1 | -6.058005 | -2.535131 | -0.006583 |
| 22 | 6 | -9.32112  | 0.839864  | 0.050697  |
| 23 | 1 | -9.976068 | 0.208553  | -0.555923 |
| 24 | 1 | -9.718919 | 0.830076  | 1.071977  |
| 25 | 1 | -9.402539 | 1.864428  | -0.32001  |
| 26 | 8 | -3.941116 | -1.053395 | -0.022377 |
| 27 | 1 | -3.240696 | -0.314528 | -0.029721 |
| 28 | 8 | 3.675085  | -1.710777 | 0.02233   |
| 29 | 6 | 2.871249  | -2.743393 | 0.012192  |
| 30 | 8 | 1.60515   | -2.410977 | -0.000403 |
| 31 | 8 | 3.273033  | -3.93344  | 0.014166  |

### COM1a-2

E(B3LYP)= -1766.9847444 Hartree

Zero-point correction= 0.185260 (Hartree/Particle)

Sum of electronic and zero-point Energies= -1766.799484 Hartree

Sum of electronic and thermal Enthalpies = -1766.773945 Hartree

Sum of electronic and thermal Free Energies= -1766.837300 Hartree

| Center<br>Number | Atomic<br>number | Coordinates(Angstroms) |           |           |
|------------------|------------------|------------------------|-----------|-----------|
|                  |                  | x                      | y         | z         |
| 1                | 92               | 1.608404               | -0.00595  | 0.018407  |
| 2                | 8                | 2.280125               | 2.347579  | 0.278263  |
| 3                | 8                | 0.14281                | 1.953956  | 0.049073  |
| 4                | 8                | -0.820069              | -0.602429 | -0.300779 |
| 5                | 8                | 0.61519                | -2.249495 | -0.238921 |
| 6                | 6                | 1.076254               | 2.856095  | 0.219993  |
| 7                | 6                | -0.633104              | -1.907637 | -0.376544 |
| 8                | 8                | -1.568162              | -2.719061 | -0.561626 |
| 9                | 8                | 0.838123               | 4.085319  | 0.318741  |
| 10               | 8                | 1.425204               | -0.156335 | 1.818204  |
| 11               | 8                | 1.776307               | 0.137277  | -1.783505 |
| 12               | 6                | -5.25068               | 1.138558  | -0.915437 |
| 13               | 6                | -6.507105              | 0.870175  | -0.381292 |
| 14               | 6                | -4.155932              | 0.316748  | -0.606782 |
| 15               | 1                | -7.337021              | 1.522803  | -0.637094 |
| 16               | 6                | -6.723831              | -0.21685  | 0.477527  |
| 17               | 6                | -4.355533              | -0.775932 | 0.246637  |
| 18               | 1                | -3.522045              | -1.434603 | 0.463222  |
| 19               | 6                | -5.623385              | -1.026391 | 0.775654  |
| 20               | 1                | -5.755147              | -1.881498 | 1.432378  |

|    |   |           |           |           |
|----|---|-----------|-----------|-----------|
| 21 | 1 | -5.100883 | 1.986449  | -1.57528  |
| 22 | 6 | -8.094983 | -0.500431 | 1.046998  |
| 23 | 1 | -8.474894 | 0.349024  | 1.623776  |
| 24 | 1 | -8.824691 | -0.702378 | 0.255889  |
| 25 | 1 | -8.074597 | -1.369255 | 1.708622  |
| 26 | 8 | -2.956283 | 0.612924  | -1.161185 |
| 27 | 1 | -2.19276  | 0.06944   | -0.783471 |
| 28 | 8 | 3.307342  | -1.788963 | 0.032064  |
| 29 | 6 | 4.347857  | -1.010398 | 0.187742  |
| 30 | 8 | 4.03552   | 0.258379  | 0.266902  |
| 31 | 8 | 5.527827  | -1.436177 | 0.254208  |

### TS1a

E(B3LYP)= -1766.976882 Hartree

Zero-point correction= 0.183939 (Hartree/Particle)

Sum of electronic and zero-point Energies= -1766.792943 Hartree

Sum of electronic and thermal Enthalpies = -1766.767929 Hartree

Sum of electronic and thermal Free Energies= -1766.832010 Hartree

| Center<br>Number | Atomic<br>number | Coordinates(Angstroms) |           |           |
|------------------|------------------|------------------------|-----------|-----------|
|                  |                  | x                      | y         | z         |
| 1                | 92               | 1.713353               | 0.039877  | -0.034221 |
| 2                | 8                | -0.500679              | -0.344735 | 0.66578   |
| 3                | 8                | 0.058673               | -2.348006 | 1.470196  |
| 4                | 8                | 2.751708               | -2.091734 | -0.431243 |
| 5                | 8                | 4.00406                | -0.342917 | -0.8387   |
| 6                | 6                | -0.802664              | -1.424845 | 1.364773  |
| 7                | 6                | 3.920645               | -1.647458 | -0.844917 |
| 8                | 8                | 4.84967                | -2.405005 | -1.205022 |
| 9                | 8                | -1.970837              | -1.489212 | 1.905126  |
| 10               | 8                | 2.312305               | 0.059346  | 1.673096  |
| 11               | 8                | 1.123261               | 0.026517  | -1.746792 |
| 12               | 6                | -5.716823              | 1.080315  | 0.753105  |
| 13               | 6                | -6.721846              | 0.914821  | -0.196862 |
| 14               | 6                | -4.648675              | 0.173109  | 0.828695  |
| 15               | 1                | -7.534214              | 1.635065  | -0.232114 |
| 16               | 6                | -6.709052              | -0.152483 | -1.104383 |
| 17               | 6                | -4.619355              | -0.896526 | -0.080861 |
| 18               | 1                | -3.797426              | -1.601817 | -0.040235 |
| 19               | 6                | -5.63556               | -1.046693 | -1.024221 |
| 20               | 1                | -5.585772              | -1.882517 | -1.716343 |
| 21               | 1                | -5.744782              | 1.915206  | 1.445229  |
| 22               | 6                | -7.822577              | -0.345331 | -2.108174 |
| 23               | 1                | -8.64539               | -0.935127 | -1.687683 |

|    |   |           |           |           |
|----|---|-----------|-----------|-----------|
| 24 | 1 | -8.242234 | 0.612126  | -2.427503 |
| 25 | 1 | -7.468916 | -0.872006 | -2.998044 |
| 26 | 8 | -3.695182 | 0.366992  | 1.764294  |
| 27 | 1 | -2.969794 | -0.367335 | 1.750598  |
| 28 | 8 | 2.798961  | 2.179194  | -0.430256 |
| 29 | 6 | 1.783057  | 2.933434  | -0.084984 |
| 30 | 8 | 0.729404  | 2.241306  | 0.280082  |
| 31 | 8 | 1.8133    | 4.185459  | -0.101391 |

### INT1a

E(B3LYP)= -1766.981836 Hartree

Zero-point correction= 0.184081 (Hartree/Particle)

Sum of electronic and zero-point Energies= -1766.797754 Hartree

Sum of electronic and thermal Enthalpies = -1766.771914 Hartree

Sum of electronic and thermal Free Energies= -1766.839160 Hartree

| Center<br>Number | Atomic<br>number | Coordinates(Angstroms) |           |           |
|------------------|------------------|------------------------|-----------|-----------|
|                  |                  | x                      | y         | z         |
| 1                | 92               | 1.664091               | 0.070875  | -0.069562 |
| 2                | 8                | -0.242363              | -2.802161 | 1.957366  |
| 3                | 8                | -0.206149              | -1.023732 | 0.592398  |
| 4                | 8                | 0.611666               | 2.142315  | 0.559007  |
| 5                | 8                | 2.642584               | 2.28905   | -0.267308 |
| 6                | 6                | -0.759906              | -1.715019 | 1.59354   |
| 7                | 6                | 1.609315               | 2.934239  | 0.220418  |
| 8                | 8                | 1.569591               | 4.176541  | 0.353733  |
| 9                | 8                | -1.823515              | -1.221426 | 2.122658  |
| 10               | 8                | 0.96904                | 0.222693  | -1.738467 |
| 11               | 8                | 2.346583               | -0.085082 | 1.602127  |
| 12               | 6                | -4.603389              | -0.917422 | 0.27084   |
| 13               | 6                | -5.757404              | -1.21251  | -0.454336 |
| 14               | 6                | -4.248988              | 0.417214  | 0.525467  |
| 15               | 1                | -6.00994               | -2.25383  | -0.633229 |
| 16               | 6                | -6.595764              | -0.208124 | -0.951861 |
| 17               | 6                | -5.084087              | 1.432656  | 0.036232  |
| 18               | 1                | -4.822001              | 2.466756  | 0.232776  |
| 19               | 6                | -6.233058              | 1.11843   | -0.686051 |
| 20               | 1                | -6.861801              | 1.926058  | -1.049693 |
| 21               | 1                | -3.973527              | -1.712948 | 0.651879  |
| 22               | 6                | -7.825868              | -0.541126 | -1.764614 |
| 23               | 1                | -8.585253              | 0.239744  | -1.67526  |
| 24               | 1                | -7.588376              | -0.642582 | -2.829894 |
| 25               | 1                | -8.272655              | -1.485141 | -1.442114 |
| 26               | 8                | -3.147066              | 0.764549  | 1.2254    |

|    |   |           |           |           |
|----|---|-----------|-----------|-----------|
| 27 | 1 | -2.594229 | -0.046905 | 1.524481  |
| 28 | 8 | 3.863306  | -0.345155 | -1.008627 |
| 29 | 6 | 3.733042  | -1.648634 | -1.097845 |
| 30 | 8 | 2.570413  | -2.087355 | -0.662452 |
| 31 | 8 | 4.621921  | -2.40147  | -1.552086 |

### TS2a

E(B3LYP)= -1766.978382Hartree

Zero-point correction = 0.180108 (Hartree/Particle)

Sum of electronic and zero-point Energies= -1766.798274 Hartree

Sum of electronic and thermal Enthalpies = -1766.772838 Hartree

Sum of electronic and thermal Free Energies= -1766.836830 Hartree

| Center<br>Number | Atomic<br>number | Coordinates(Angstroms) |           |           |
|------------------|------------------|------------------------|-----------|-----------|
|                  |                  | x                      | y         | z         |
| 1                | 92               | 1.598609               | 0.097865  | -0.075665 |
| 2                | 8                | -0.054329              | -2.834207 | 2.027317  |
| 3                | 8                | -0.264675              | -1.057965 | 0.671371  |
| 4                | 8                | 0.531803               | 2.118575  | 0.645532  |
| 5                | 8                | 2.517462               | 2.33189   | -0.267437 |
| 6                | 6                | -0.668089              | -1.815874 | 1.66092   |
| 7                | 6                | 1.493948               | 2.943906  | 0.28172   |
| 8                | 8                | 1.432178               | 4.17996   | 0.445963  |
| 9                | 8                | -1.789808              | -1.460823 | 2.262932  |
| 10               | 8                | 0.816335               | 0.262865  | -1.699179 |
| 11               | 8                | 2.355036               | -0.084529 | 1.55638   |
| 12               | 6                | -4.406606              | -1.011959 | 0.116399  |
| 13               | 6                | -5.484491              | -1.174626 | -0.752233 |
| 14               | 6                | -4.107786              | 0.248033  | 0.693203  |
| 15               | 1                | -5.676859              | -2.161266 | -1.16682  |
| 16               | 6                | -6.325094              | -0.11071  | -1.103111 |
| 17               | 6                | -4.964189              | 1.31867   | 0.336857  |
| 18               | 1                | -4.768555              | 2.297435  | 0.764457  |
| 19               | 6                | -6.036143              | 1.136927  | -0.533322 |
| 20               | 1                | -6.667023              | 1.989217  | -0.773931 |
| 21               | 1                | -3.781843              | -1.863027 | 0.366196  |
| 22               | 6                | -7.469855              | -0.292616 | -2.074032 |
| 23               | 1                | -8.285359              | 0.405322  | -1.864963 |
| 24               | 1                | -7.15725               | -0.120766 | -3.111224 |
| 25               | 1                | -7.876769              | -1.306469 | -2.025392 |
| 26               | 8                | -3.099041              | 0.4394    | 1.524916  |
| 27               | 1                | -2.359896              | -0.57631  | 1.835514  |
| 28               | 8                | 3.743808               | -0.267622 | -1.125384 |
| 29               | 6                | 3.63054                | -1.572652 | -1.227342 |

|    |   |          |           |           |
|----|---|----------|-----------|-----------|
| 30 | 8 | 2.495432 | -2.032778 | -0.742476 |
| 31 | 8 | 4.50682  | -2.305054 | -1.732056 |

### INT2a

E(B3LYP)= -1766.978564 Hartree

Zero-point correction = 0.182534 (Hartree/Particle)

Sum of electronic and zero-point Energies= -1766.79603 Hartree

Sum of electronic and thermal Enthalpies = -1766.770099 Hartree

Sum of electronic and thermal Free Energies= -1766.835920 Hartree

| Center<br>Number | Atomic<br>number | Coordinates(Angstroms) |           |           |
|------------------|------------------|------------------------|-----------|-----------|
|                  |                  | x                      | y         | z         |
| 1                | 92               | 1.559476               | 0.105433  | -0.075651 |
| 2                | 8                | 0.102966               | -2.799227 | 2.266037  |
| 3                | 8                | -0.217968              | -1.094548 | 0.837528  |
| 4                | 8                | 0.52391                | 2.092084  | 0.764502  |
| 5                | 8                | 2.398586               | 2.357618  | -0.346591 |
| 6                | 6                | -0.555373              | -1.833591 | 1.853291  |
| 7                | 6                | 1.427412               | 2.942235  | 0.316771  |
| 8                | 8                | 1.361425               | 4.17347   | 0.508541  |
| 9                | 8                | -1.701085              | -1.516419 | 2.462716  |
| 10               | 8                | 0.617527               | 0.251878  | -1.612164 |
| 11               | 8                | 2.471062               | -0.061851 | 1.475435  |
| 12               | 6                | -4.244283              | -1.010112 | 0.041032  |
| 13               | 6                | -5.256525              | -1.153304 | -0.907212 |
| 14               | 6                | -4.053948              | 0.206473  | 0.751398  |
| 15               | 1                | -5.36094               | -2.106547 | -1.420447 |
| 16               | 6                | -6.139869              | -0.11195  | -1.218022 |
| 17               | 6                | -4.958853              | 1.254825  | 0.428789  |
| 18               | 1                | -4.852739              | 2.200534  | 0.952658  |
| 19               | 6                | -5.962954              | 1.092741  | -0.521366 |
| 20               | 1                | -6.630272              | 1.926837  | -0.726765 |
| 21               | 1                | -3.583124              | -1.844919 | 0.252235  |
| 22               | 6                | -7.21312               | -0.266128 | -2.272187 |
| 23               | 1                | -8.141869              | 0.231727  | -1.977226 |
| 24               | 1                | -6.909966              | 0.167001  | -3.233333 |
| 25               | 1                | -7.443083              | -1.319746 | -2.451978 |
| 26               | 8                | -3.115265              | 0.36949   | 1.654094  |
| 27               | 1                | -2.242907              | -0.721091 | 2.021733  |
| 28               | 8                | 3.596745               | -0.226062 | -1.325325 |
| 29               | 6                | 3.501244               | -1.534457 | -1.404582 |
| 30               | 8                | 2.419622               | -2.009502 | -0.820384 |
| 31               | 8                | 4.346319               | -2.256184 | -1.972448 |

### TS3a

E(B3LYP)= -1766.962707 Hartree

Zero-point correction= 0.183851 (Hartree/Particle)

Sum of electronic and zero-point Energies= -1766.778857 Hartree

Sum of electronic and thermal Enthalpies = -1766.754097 Hartree

Sum of electronic and thermal Free Energies= -1766.814990 Hartree

| Center<br>Number | Atomic<br>number | Coordinates(Angstroms) |           |           |
|------------------|------------------|------------------------|-----------|-----------|
|                  |                  | x                      | y         | z         |
| 1                | 92               | 1.105086               | -0.180765 | 0.027165  |
| 2                | 8                | 0.061885               | 4.185513  | 0.065289  |
| 3                | 8                | 0.109734               | 1.979477  | 0.484568  |
| 4                | 8                | -0.247137              | -2.117739 | -0.517721 |
| 5                | 8                | 1.891017               | -2.494825 | -0.322048 |
| 6                | 6                | -0.255379              | 3.010646  | -0.192983 |
| 7                | 6                | 0.713921               | -3.008345 | -0.556377 |
| 8                | 8                | 0.516346               | -4.224546 | -0.794025 |
| 9                | 8                | -1.058333              | 2.781297  | -1.253719 |
| 10               | 8                | 0.809788               | -0.53443  | 1.774107  |
| 11               | 8                | 1.393879               | 0.196692  | -1.713353 |
| 12               | 6                | -4.002593              | 0.929658  | -0.930728 |
| 13               | 6                | -5.267973              | 0.707655  | -0.388159 |
| 14               | 6                | -2.875366              | 0.159468  | -0.53766  |
| 15               | 1                | -6.097922              | 1.32603   | -0.722652 |
| 16               | 6                | -5.500387              | -0.287643 | 0.56905   |
| 17               | 6                | -3.124043              | -0.853163 | 0.426512  |
| 18               | 1                | -2.290364              | -1.477483 | 0.724383  |
| 19               | 6                | -4.395523              | -1.061925 | 0.953684  |
| 20               | 1                | -4.534537              | -1.853434 | 1.687146  |
| 21               | 1                | -3.864607              | 1.707086  | -1.676515 |
| 22               | 6                | -6.866994              | -0.498919 | 1.181215  |
| 23               | 1                | -7.656805              | -0.108389 | 0.533753  |
| 24               | 1                | -7.071413              | -1.559915 | 1.353589  |
| 25               | 1                | -6.964371              | 0.006502  | 2.149997  |
| 26               | 8                | -1.676354              | 0.370203  | -1.039907 |
| 27               | 1                | -1.339721              | 1.777424  | -1.230523 |
| 28               | 8                | 4.995771               | 1.095241  | 0.844191  |
| 29               | 6                | 3.821235               | 0.719178  | 0.611971  |
| 30               | 8                | 3.494573               | -0.523416 | 0.362887  |
| 31               | 8                | 2.792639               | 1.525645  | 0.592548  |

### INT3a

E(B3LYP)= -1766.967652 Hartree

Zero-point correction= 0.185219 (Hartree/Particle)

Sum of electronic and zero-point Energies= -1766.782434 Hartree

Sum of electronic and thermal Enthalpies = -1766.756892 Hartree

Sum of electronic and thermal Free Energies= -1766.820870 Hartree

| Center<br>Number | Atomic<br>number | Coordinates(Angstroms) |           |           |
|------------------|------------------|------------------------|-----------|-----------|
|                  |                  | x                      | y         | z         |
| 1                | 92               | -0.97894               | -0.204643 | 0.023852  |
| 2                | 8                | -0.646122              | 4.534823  | 0.361492  |
| 3                | 8                | -0.753355              | 2.376221  | -0.257498 |
| 4                | 8                | 0.642899               | -1.868289 | 0.879992  |
| 5                | 8                | -1.337565              | -2.616794 | 0.379413  |
| 6                | 6                | -0.251844              | 3.351848  | 0.383895  |
| 7                | 6                | -0.146189              | -2.906978 | 0.828753  |
| 8                | 8                | 0.203236               | -4.064325 | 1.175343  |
| 9                | 8                | 0.831233               | 3.078722  | 1.177381  |
| 10               | 8                | -0.515302              | -0.533063 | -1.69388  |
| 11               | 8                | -1.438941              | 0.157696  | 1.736213  |
| 12               | 6                | 3.596257               | 0.606212  | 1.000488  |
| 13               | 6                | 4.919794               | 0.337643  | 0.653545  |
| 14               | 6                | 2.53497                | 0.368456  | 0.097387  |
| 15               | 1                | 5.704149               | 0.535615  | 1.379817  |
| 16               | 6                | 5.262555               | -0.184483 | -0.599318 |
| 17               | 6                | 2.884009               | -0.168032 | -1.163425 |
| 18               | 1                | 2.088107               | -0.377469 | -1.869186 |
| 19               | 6                | 4.210647               | -0.433744 | -1.492573 |
| 20               | 1                | 4.434869               | -0.848211 | -2.472593 |
| 21               | 1                | 3.361734               | 1.003524  | 1.983466  |
| 22               | 6                | 6.701638               | -0.445138 | -0.982754 |
| 23               | 1                | 7.333861               | -0.556955 | -0.098068 |
| 24               | 1                | 6.799333               | -1.355616 | -1.581092 |
| 25               | 1                | 7.119232               | 0.376001  | -1.577733 |
| 26               | 8                | 1.28644                | 0.667395  | 0.422927  |
| 27               | 1                | 1.079758               | 2.121705  | 0.984747  |
| 28               | 8                | -4.984563              | 0.13365   | -1.223138 |
| 29               | 6                | -3.79029               | 0.033999  | -0.839742 |
| 30               | 8                | -3.267538              | -1.073433 | -0.389199 |
| 31               | 8                | -2.943907              | 1.028631  | -0.851703 |

#### TS4a

E(B3LYP)= -1766.966078 Hartree

Zero-point correction= 0.184992 (Hartree/Particle)

Sum of electronic and zero-point Energies= -1766.781086 Hartree

Sum of electronic and thermal Enthalpies = -1766.756137 Hartree

Sum of electronic and thermal Free Energies= -1766.818110 Hartree

---

| Center | Atomic | Coordinates(Angstroms) |  |  |
|--------|--------|------------------------|--|--|
|--------|--------|------------------------|--|--|

---

| Number | number | x         | y         | z         |
|--------|--------|-----------|-----------|-----------|
| 1      | 92     | -0.996022 | -0.243394 | 0.028753  |
| 2      | 8      | 0.051298  | 4.617124  | -0.052697 |
| 3      | 8      | -0.245105 | 2.460252  | -0.638898 |
| 4      | 8      | 0.450223  | -2.171962 | 0.505257  |
| 5      | 8      | -1.637397 | -2.603565 | 0.054268  |
| 6      | 6      | 0.192988  | 3.384205  | 0.098689  |
| 7      | 6      | -0.464535 | -3.094523 | 0.362089  |
| 8      | 8      | -0.242415 | -4.322078 | 0.50652   |
| 9      | 8      | 0.917061  | 2.995178  | 1.212987  |
| 10     | 8      | -0.612301 | -0.394354 | -1.730523 |
| 11     | 8      | -1.388518 | -0.097242 | 1.7892    |
| 12     | 6      | 3.549237  | 0.381285  | 1.225352  |
| 13     | 6      | 4.875421  | 0.170829  | 0.849468  |
| 14     | 6      | 2.486101  | 0.187892  | 0.314697  |
| 15     | 1      | 5.661779  | 0.331201  | 1.582654  |
| 16     | 6      | 5.217948  | -0.244863 | -0.44251  |
| 17     | 6      | 2.835036  | -0.237141 | -0.987555 |
| 18     | 1      | 2.040023  | -0.405361 | -1.704968 |
| 19     | 6      | 4.16431   | -0.44577  | -1.345806 |
| 20     | 1      | 4.38902   | -0.774958 | -2.357488 |
| 21     | 1      | 3.313251  | 0.69915   | 2.236349  |
| 22     | 6      | 6.658578  | -0.443454 | -0.855966 |
| 23     | 1      | 6.777799  | -1.329564 | -1.486325 |
| 24     | 1      | 7.037888  | 0.410913  | -1.42914  |
| 25     | 1      | 7.307783  | -0.562897 | 0.015138  |
| 26     | 8      | 1.232795  | 0.42045   | 0.682323  |
| 27     | 1      | 1.049605  | 2.012218  | 1.126614  |
| 28     | 8      | -4.943065 | 0.942366  | -0.673789 |
| 29     | 6      | -3.755933 | 0.573589  | -0.492724 |
| 30     | 8      | -3.386713 | -0.677149 | -0.431589 |
| 31     | 8      | -2.758115 | 1.408385  | -0.345869 |

#### INT4a

E(B3LYP)= -1766.983606 Hartree

Zero-point correction= 0.184236 (Hartree/Particle)

Sum of electronic and zero-point Energies= -1766.79937 Hartree

Sum of electronic and thermal Enthalpies = -1766.772966 Hartree

Sum of electronic and thermal Free Energies= -1766.840810 Hartree

| Center | Atomic | Coordinates(Angstroms) |           |           |
|--------|--------|------------------------|-----------|-----------|
| Number | number | x                      | y         | z         |
| 1      | 92     | 1.183863               | -0.159794 | 0.036767  |
| 2      | 8      | -2.680378              | 4.632426  | -1.615257 |



|    |   |           |           |           |
|----|---|-----------|-----------|-----------|
| 3  | 8 | -2.167248 | 3.649208  | 0.352878  |
| 4  | 8 | 1.127509  | -1.007869 | -2.21235  |
| 5  | 8 | 3.072915  | -1.049107 | -1.192777 |
| 6  | 6 | -2.271455 | 3.693115  | -0.896472 |
| 7  | 6 | 2.403861  | -1.326824 | -2.288551 |
| 8  | 8 | 2.920297  | -1.842163 | -3.302275 |
| 9  | 8 | -1.886732 | 2.553237  | -1.602865 |
| 10 | 8 | 0.803815  | -1.812295 | 0.666801  |
| 11 | 8 | 1.525474  | 1.500094  | -0.599164 |
| 12 | 6 | -2.819116 | -1.175035 | -0.998194 |
| 13 | 6 | -3.985001 | -1.900694 | -0.757632 |
| 14 | 6 | -2.186818 | -0.459463 | 0.035753  |
| 15 | 1 | -4.443576 | -2.445838 | -1.578092 |
| 16 | 6 | -4.575408 | -1.946974 | 0.51108   |
| 17 | 6 | -2.777198 | -0.504243 | 1.313191  |
| 18 | 1 | -2.306152 | 0.037799  | 2.126021  |
| 19 | 6 | -3.942328 | -1.234577 | 1.537733  |
| 20 | 1 | -4.367357 | -1.251129 | 2.537671  |
| 21 | 1 | -2.379581 | -1.156921 | -1.989972 |
| 22 | 6 | -5.856719 | -2.709755 | 0.758316  |
| 23 | 1 | -5.876672 | -3.141773 | 1.762461  |
| 24 | 1 | -6.73569  | -2.060749 | 0.668722  |
| 25 | 1 | -5.980138 | -3.523284 | 0.039065  |
| 26 | 8 | -1.07373  | 0.252263  | -0.193789 |
| 27 | 1 | -1.58291  | 1.860003  | -0.977731 |
| 28 | 8 | 2.738239  | 0.890563  | 3.707698  |
| 29 | 6 | 2.278274  | 0.571767  | 2.591128  |
| 30 | 8 | 3.00138   | 0.047003  | 1.628464  |
| 31 | 8 | 1.011973  | 0.729016  | 2.261531  |

### 1b

E(B3LYP)= -1502.325995 Hartree

Zero-point correction= 0.157016 (Hartree/Particle)

Sum of electronic and zero-point Energies= -1502.168979 Hartree

Sum of electronic and thermal Enthalpies = -1502.14797 Hartree

Sum of electronic and thermal Free Energies= -1502.202610 Hartree

| Center<br>Number | Atomic<br>number | Coordinates(Angstroms) |           |           |
|------------------|------------------|------------------------|-----------|-----------|
|                  |                  | x                      | y         | z         |
| 1                | 92               | -0.952481              | 0.004478  | 0.096996  |
| 2                | 8                | -0.728646              | 2.403809  | 0.115235  |
| 3                | 8                | -2.66344               | 1.597775  | -0.544077 |
| 4                | 8                | -2.804679              | -1.44419  | -0.508871 |
| 5                | 8                | -0.948696              | -2.402063 | 0.173201  |

|    |   |           |           |           |
|----|---|-----------|-----------|-----------|
| 6  | 6 | -1.942313 | 2.672586  | -0.320823 |
| 7  | 6 | -2.183542 | -2.572676 | -0.253499 |
| 8  | 8 | -2.7064   | -3.69807  | -0.398979 |
| 9  | 8 | -2.361554 | 3.83546   | -0.503146 |
| 10 | 8 | -1.541218 | 0.046381  | 1.811587  |
| 11 | 8 | -0.348315 | -0.038022 | -1.609991 |
| 12 | 6 | 2.469923  | -0.061276 | 0.48565   |
| 13 | 6 | 3.215965  | 1.135061  | 0.441628  |
| 14 | 6 | 3.144302  | -1.255464 | 0.155197  |
| 15 | 6 | 4.564228  | 1.127929  | 0.090002  |
| 16 | 6 | 4.493277  | -1.244178 | -0.193818 |
| 17 | 6 | 5.237126  | -0.057637 | -0.231761 |
| 18 | 1 | 2.718649  | 2.067893  | 0.686121  |
| 19 | 1 | 2.59123   | -2.188798 | 0.175775  |
| 20 | 1 | 5.105152  | 2.070117  | 0.064703  |
| 21 | 1 | 4.978271  | -2.18388  | -0.44449  |
| 22 | 8 | 1.188647  | -0.062362 | 0.839427  |
| 23 | 6 | 6.709271  | -0.060992 | -0.574819 |
| 24 | 1 | 6.951389  | -0.854352 | -1.286962 |
| 25 | 1 | 7.017783  | 0.891222  | -1.014037 |
| 26 | 1 | 7.330778  | -0.224036 | 0.313653  |

### COM1b

E(B3LYP)= -1849.233978 Hartree

Zero-point correction= 0.288962 (Hartree/Particle)

Sum of electronic and zero-point Energies= -1848.945016 Hartree

Sum of electronic and thermal Enthalpies = -1848.914789 Hartree

Sum of electronic and thermal Free Energies= -1848.991710 Hartree

| Center<br>Number | Atomic<br>number | Coordinates(Angstroms) |           |           |
|------------------|------------------|------------------------|-----------|-----------|
|                  |                  | x                      | y         | z         |
| 1                | 92               | -1.172723              | 0.87747   | 0.19444   |
| 2                | 8                | 1.238581               | 0.96207   | -0.241218 |
| 3                | 8                | 0.400385               | -0.960401 | 0.418847  |
| 4                | 6                | 1.45861                | -0.285335 | 0.060952  |
| 5                | 8                | 2.607632               | -0.813224 | 0.014797  |
| 6                | 8                | -1.466881              | 0.419146  | -1.530221 |
| 7                | 8                | -0.873754              | 1.316222  | 1.92552   |
| 8                | 6                | 7.072394               | 0.46934   | -0.792685 |
| 9                | 6                | 8.274355               | -0.188222 | -0.544399 |
| 10               | 6                | 5.852503               | -0.121947 | -0.43588  |
| 11               | 1                | 9.205019               | 0.294303  | -0.82835  |
| 12               | 6                | 8.310682               | -1.450577 | 0.06295   |
| 13               | 6                | 5.871575               | -1.38272  | 0.177365  |

|    |   |           |           |           |
|----|---|-----------|-----------|-----------|
| 14 | 1 | 4.935929  | -1.848212 | 0.464804  |
| 15 | 6 | 7.086109  | -2.026238 | 0.417934  |
| 16 | 1 | 7.074596  | -3.000942 | 0.896969  |
| 17 | 1 | 7.064644  | 1.447709  | -1.26094  |
| 18 | 6 | 9.618944  | -2.169323 | 0.299506  |
| 19 | 1 | 9.941741  | -2.718773 | -0.592234 |
| 20 | 1 | 10.418649 | -1.468621 | 0.55358   |
| 21 | 1 | 9.533036  | -2.893106 | 1.113516  |
| 22 | 8 | 4.706986  | 0.55448   | -0.6944   |
| 23 | 1 | 3.887738  | 0.037603  | -0.407907 |
| 24 | 8 | -2.873716 | 2.562939  | 0.060626  |
| 25 | 6 | -2.089557 | 3.543721  | -0.340939 |
| 26 | 8 | -0.833228 | 3.181008  | -0.466965 |
| 27 | 8 | -2.504159 | 4.69738   | -0.576537 |
| 28 | 6 | -4.938953 | -1.113604 | -0.04852  |
| 29 | 6 | -5.852644 | -2.077195 | -0.470758 |
| 30 | 6 | -3.658323 | -1.481847 | 0.412667  |
| 31 | 1 | -6.829418 | -1.756011 | -0.822497 |
| 32 | 6 | -5.544746 | -3.443714 | -0.455841 |
| 33 | 6 | -3.343868 | -2.856131 | 0.422619  |
| 34 | 1 | -2.361658 | -3.162773 | 0.766786  |
| 35 | 6 | -4.269716 | -3.806366 | -0.0034   |
| 36 | 1 | -3.99104  | -4.856505 | 0.015688  |
| 37 | 1 | -5.201904 | -0.061227 | -0.071532 |
| 38 | 8 | -2.784666 | -0.571706 | 0.83558   |
| 39 | 6 | -6.555734 | -4.48401  | -0.880703 |
| 40 | 1 | -7.216489 | -4.102416 | -1.663618 |
| 41 | 1 | -6.065067 | -5.382978 | -1.26267  |
| 42 | 1 | -7.192473 | -4.793565 | -0.043521 |

### TS1b

E(B3LYP)= -1849.219288 Hartree

Zero-point correction= 0.288184 (Hartree/Particle)

Sum of electronic and zero-point Energies= -1848.931104 Hartree

Sum of electronic and thermal Enthalpies = -1848.901549 Hartree

Sum of electronic and thermal Free Energies= -1848.976440 Hartree

| Center<br>Number | Atomic<br>number | Coordinates(Angstroms) |           |           |
|------------------|------------------|------------------------|-----------|-----------|
|                  |                  | x                      | y         | z         |
| 1                | 92               | -0.755304              | 0.66169   | 0.100076  |
| 2                | 8                | 1.118813               | -0.435147 | -0.609916 |
| 3                | 8                | 0.256419               | -2.443023 | -1.080106 |
| 4                | 6                | 1.215083               | -1.631095 | -1.196152 |
| 5                | 8                | 2.29476                | -1.887921 | -1.83937  |

|    |   |           |           |           |
|----|---|-----------|-----------|-----------|
| 6  | 8 | -1.481531 | 0.505797  | -1.544412 |
| 7  | 8 | -0.036209 | 0.787815  | 1.755578  |
| 8  | 6 | 6.453929  | 0.126618  | -0.96268  |
| 9  | 6 | 7.403545  | -0.055055 | 0.039971  |
| 10 | 6 | 5.24635   | -0.586447 | -0.938816 |
| 11 | 1 | 8.327814  | 0.513762  | -0.003194 |
| 12 | 6 | 7.194273  | -0.948028 | 1.098751  |
| 13 | 6 | 5.020765  | -1.481005 | 0.119283  |
| 14 | 1 | 4.090561  | -2.036079 | 0.154317  |
| 15 | 6 | 5.983621  | -1.650059 | 1.113984  |
| 16 | 1 | 5.781847  | -2.345954 | 1.923316  |
| 17 | 1 | 6.633934  | 0.825191  | -1.772861 |
| 18 | 6 | 8.243799  | -1.164886 | 2.164694  |
| 19 | 1 | 8.928845  | -1.976914 | 1.894709  |
| 20 | 1 | 8.849261  | -0.267609 | 2.315407  |
| 21 | 1 | 7.789515  | -1.430484 | 3.122642  |
| 22 | 8 | 4.351484  | -0.379128 | -1.930375 |
| 23 | 1 | 3.508438  | -0.951996 | -1.826134 |
| 24 | 8 | -1.778618 | 2.807957  | 0.376162  |
| 25 | 6 | -0.775264 | 3.497894  | -0.12463  |
| 26 | 8 | 0.231406  | 2.733541  | -0.505704 |
| 27 | 8 | -0.772884 | 4.737939  | -0.22951  |
| 28 | 6 | -4.904629 | -0.005495 | 0.417792  |
| 29 | 6 | -6.147827 | -0.56634  | 0.1329    |
| 30 | 6 | -3.787718 | -0.821057 | 0.690101  |
| 31 | 1 | -6.98597  | 0.093205  | -0.075159 |
| 32 | 6 | -6.343013 | -1.953167 | 0.105517  |
| 33 | 6 | -3.979573 | -2.216702 | 0.657885  |
| 34 | 1 | -3.131853 | -2.863605 | 0.858357  |
| 35 | 6 | -5.229689 | -2.760924 | 0.370325  |
| 36 | 1 | -5.33986  | -3.841735 | 0.350458  |
| 37 | 1 | -4.779596 | 1.072141  | 0.431586  |
| 38 | 8 | -2.599689 | -0.295025 | 0.983703  |
| 39 | 6 | -7.703906 | -2.551046 | -0.168373 |
| 40 | 1 | -8.290188 | -1.917149 | -0.838784 |
| 41 | 1 | -7.619952 | -3.539584 | -0.627097 |
| 42 | 1 | -8.284939 | -2.670337 | 0.75371   |

### INT1b

E(B3LYP)= -1849.219819 Hartree

Zero-point correction= 0.288106 (Hartree/Particle)

Sum of electronic and zero-point Energies= -1848.931713 Hartree

Sum of electronic and thermal Enthalpies = -1848.901262 Hartree

Sum of electronic and thermal Free Energies= -1848.978390 Hartree

| Center<br>Number | Atomic<br>number | Coordinates(Angstroms) |           |           |
|------------------|------------------|------------------------|-----------|-----------|
|                  |                  | x                      | y         | z         |
| 1                | 92               | 0.617132               | 0.579956  | -0.093199 |
| 2                | 8                | -0.828709              | -1.124124 | 0.242972  |
| 3                | 8                | -0.223839              | -3.042437 | 1.237406  |
| 4                | 6                | -1.045487              | -2.097099 | 1.143582  |
| 5                | 8                | -2.114633              | -1.999901 | 1.847348  |
| 6                | 8                | 1.325722               | 0.303731  | 1.543531  |
| 7                | 8                | -0.103967              | 0.834365  | -1.733108 |
| 8                | 6                | -5.864855              | 0.572733  | 0.625784  |
| 9                | 6                | -6.936709              | 0.340089  | -0.231621 |
| 10               | 6                | -4.839525              | -0.375985 | 0.759999  |
| 11               | 1                | -7.713688              | 1.094378  | -0.316934 |
| 12               | 6                | -7.035293              | -0.837578 | -0.984956 |
| 13               | 6                | -4.922637              | -1.557565 | 0.007627  |
| 14               | 1                | -4.136301              | -2.298284 | 0.095555  |
| 15               | 6                | -6.004746              | -1.773363 | -0.846245 |
| 16               | 1                | -6.041939              | -2.695516 | -1.419073 |
| 17               | 1                | -5.805867              | 1.492225  | 1.198267  |
| 18               | 6                | -8.219714              | -1.094148 | -1.888208 |
| 19               | 1                | -9.076283              | -1.484166 | -1.326424 |
| 20               | 1                | -8.55047               | -0.177395 | -2.383793 |
| 21               | 1                | -7.977512              | -1.826862 | -2.661663 |
| 22               | 8                | -3.817165              | -0.110542 | 1.603009  |
| 23               | 1                | -3.120671              | -0.862011 | 1.626325  |
| 24               | 8                | 1.606592               | 2.76422   | -0.186964 |
| 25               | 6                | 0.59456                | 3.397938  | 0.365665  |
| 26               | 8                | -0.402144              | 2.594845  | 0.68227   |
| 27               | 8                | 0.577866               | 4.626529  | 0.569498  |
| 28               | 6                | 4.86905                | 0.264435  | -0.665651 |
| 29               | 6                | 6.135825               | -0.244942 | -0.387305 |
| 30               | 6                | 3.751068               | -0.58821  | -0.758639 |
| 31               | 1                | 6.974525               | 0.442487  | -0.318309 |
| 32               | 6                | 6.353981               | -1.614725 | -0.191966 |
| 33               | 6                | 3.966331               | -1.9664   | -0.559356 |
| 34               | 1                | 3.118292               | -2.640272 | -0.622897 |
| 35               | 6                | 5.239892               | -2.458936 | -0.281828 |
| 36               | 1                | 5.36813                | -3.527166 | -0.12966  |
| 37               | 1                | 4.726287               | 1.329883  | -0.811319 |
| 38               | 8                | 2.539143               | -0.110218 | -1.039951 |
| 39               | 6                | 7.737539               | -2.161888 | 0.074815  |
| 40               | 1                | 8.362908               | -1.428923 | 0.590997  |
| 41               | 1                | 7.697493               | -3.064025 | 0.690795  |
| 42               | 1                | 8.252317               | -2.42821  | -0.855817 |

**TS2b**

E(B3LYP)= -1849.215718 Hartree

Zero-point correction= 0.285312 (Hartree/Particle)

Sum of electronic and zero-point Energies= -1848.930405 Hartree

Sum of electronic and thermal Enthalpies = -1848.900701 Hartree

Sum of electronic and thermal Free Energies= -1848.975550 Hartree

| Center<br>Number | Atomic<br>number | Coordinates(Angstroms) |           |           |
|------------------|------------------|------------------------|-----------|-----------|
|                  |                  | x                      | y         | z         |
| 1                | 92               | -0.343176              | 0.498017  | 0.181734  |
| 2                | 8                | -0.288382              | -3.794126 | 0.008969  |
| 3                | 8                | 0.335128               | -1.684437 | 0.429102  |
| 4                | 8                | 1.038555               | 2.249658  | -0.664426 |
| 5                | 8                | -0.998113              | 2.783024  | -0.046122 |
| 6                | 6                | 0.46168                | -2.827965 | -0.196734 |
| 7                | 6                | 0.148006               | 3.212801  | -0.533139 |
| 8                | 8                | 0.366273               | 4.399594  | -0.836013 |
| 9                | 8                | 1.458384               | -2.928041 | -1.063752 |
| 10               | 8                | 0.244385               | 0.822103  | 1.857159  |
| 11               | 8                | -0.933921              | 0.128884  | -1.480644 |
| 12               | 6                | -3.646144              | -0.165365 | 0.594418  |
| 13               | 6                | -4.677563              | 0.793133  | 0.617031  |
| 14               | 6                | -3.976696              | -1.47094  | 0.183425  |
| 15               | 6                | -5.976429              | 0.453027  | 0.24453   |
| 16               | 6                | -5.280989              | -1.793785 | -0.185936 |
| 17               | 6                | -6.310857              | -0.844965 | -0.162146 |
| 18               | 1                | -4.442384              | 1.805812  | 0.927094  |
| 19               | 1                | -3.195828              | -2.223329 | 0.154533  |
| 20               | 1                | -6.747508              | 1.218111  | 0.269285  |
| 21               | 1                | -5.500662              | -2.8097   | -0.502574 |
| 22               | 8                | -2.404619              | 0.156191  | 0.965909  |
| 23               | 6                | -7.729438              | -1.213733 | -0.531183 |
| 24               | 1                | -8.293101              | -1.567684 | 0.33994   |
| 25               | 1                | -8.270436              | -0.356141 | -0.939246 |
| 26               | 1                | -7.752263              | -2.012914 | -1.276576 |
| 27               | 6                | 4.415433               | -1.587624 | 0.242439  |
| 28               | 6                | 5.621906               | -1.353935 | 0.89965   |
| 29               | 6                | 4.020979               | -0.812576 | -0.878761 |
| 30               | 1                | 5.881405               | -1.976979 | 1.752381  |
| 31               | 6                | 6.506889               | -0.345765 | 0.495567  |
| 32               | 6                | 4.925003               | 0.200937  | -1.284692 |
| 33               | 1                | 4.660432               | 0.810096  | -2.143982 |
| 34               | 6                | 6.125932               | 0.42057   | -0.614375 |
| 35               | 1                | 6.786435               | 1.209383  | -0.966421 |

|    |   |          |           |           |
|----|---|----------|-----------|-----------|
| 36 | 1 | 3.7597   | -2.380945 | 0.586765  |
| 37 | 6 | 7.795073 | -0.077839 | 1.240696  |
| 38 | 1 | 8.231167 | -1.001395 | 1.632147  |
| 39 | 1 | 8.538628 | 0.393979  | 0.592673  |
| 40 | 1 | 7.641215 | 0.591735  | 2.095759  |
| 41 | 8 | 2.888254 | -1.008189 | -1.525589 |
| 42 | 1 | 2.091136 | -2.030801 | -1.182838 |

## INT2b

E(B3LYP)= -1849.215725 Hartree

Zero-point correction= 0.286031 (Hartree/Particle)

Sum of electronic and zero-point Energies= -1848.929694 Hartree

Sum of electronic and thermal Enthalpies = -1848.899282 Hartree

Sum of electronic and thermal Free Energies= -1848.975350 Hartree

| Center<br>Number | Atomic<br>number | Coordinates(Angstroms) |           |           |
|------------------|------------------|------------------------|-----------|-----------|
|                  |                  | x                      | y         | z         |
| 1                | 92               | -0.347026              | 0.495884  | 0.184571  |
| 2                | 8                | -0.307116              | -3.789151 | -0.054239 |
| 3                | 8                | 0.332719               | -1.6922   | 0.406769  |
| 4                | 8                | 1.032909               | 2.249075  | -0.659764 |
| 5                | 8                | -0.99776               | 2.783242  | -0.022698 |
| 6                | 6                | 0.447941               | -2.823979 | -0.238771 |
| 7                | 6                | 0.146122               | 3.213842  | -0.514378 |
| 8                | 8                | 0.365697               | 4.402339  | -0.808939 |
| 9                | 8                | 1.445465               | -2.917191 | -1.110145 |
| 10               | 8                | 0.251141               | 0.805959  | 1.858549  |
| 11               | 8                | -0.950852              | 0.137295  | -1.475205 |
| 12               | 6                | -3.644159              | -0.170161 | 0.611627  |
| 13               | 6                | -4.64557               | 0.815812  | 0.511769  |
| 14               | 6                | -4.007822              | -1.500778 | 0.3331    |
| 15               | 6                | -5.945116              | 0.477974  | 0.142343  |
| 16               | 6                | -5.313547              | -1.821217 | -0.036352 |
| 17               | 6                | -6.310415              | -0.844455 | -0.143824 |
| 18               | 1                | -4.386955              | 1.846236  | 0.731421  |
| 19               | 1                | -3.253952              | -2.276602 | 0.412895  |
| 20               | 1                | -6.693347              | 1.263179  | 0.07661   |
| 21               | 1                | -5.560763              | -2.858567 | -0.2441   |
| 22               | 8                | -2.401797              | 0.149265  | 0.982746  |
| 23               | 6                | -7.716305              | -1.194168 | -0.574873 |
| 24               | 1                | -7.925326              | -2.255717 | -0.422145 |
| 25               | 1                | -8.461006              | -0.620211 | -0.016415 |
| 26               | 1                | -7.875909              | -0.980092 | -1.637987 |
| 27               | 6                | 4.43044                | -1.593648 | 0.223714  |
| 28               | 6                | 5.637011               | -1.368952 | 0.883571  |

|    |   |          |           |           |
|----|---|----------|-----------|-----------|
| 29 | 6 | 4.031635 | -0.800639 | -0.884636 |
| 30 | 1 | 5.898683 | -2.006105 | 1.725238  |
| 31 | 6 | 6.519935 | -0.352227 | 0.496054  |
| 32 | 6 | 4.934942 | 0.221612  | -1.273264 |
| 33 | 1 | 4.668846 | 0.845138  | -2.121804 |
| 34 | 6 | 6.136114 | 0.432038  | -0.600297 |
| 35 | 1 | 6.794768 | 1.228149  | -0.939384 |
| 36 | 1 | 3.776707 | -2.394243 | 0.555306  |
| 37 | 6 | 7.808226 | -0.094846 | 1.24479   |
| 38 | 1 | 8.253904 | -1.025457 | 1.607954  |
| 39 | 1 | 8.545507 | 0.401934  | 0.60835   |
| 40 | 1 | 7.651802 | 0.548269  | 2.119518  |
| 41 | 8 | 2.899896 | -0.988595 | -1.531496 |
| 42 | 1 | 2.07437  | -2.03475  | -1.204057 |

### TS3b

E(B3LYP)= -1849.214623 Hartree

Zero-point correction= 0.286778 (Hartree/Particle)

Sum of electronic and zero-point Energies= -1848.927845 Hartree

Sum of electronic and thermal Enthalpies = -1848.898467 Hartree

Sum of electronic and thermal Free Energies= -1848.971370 Hartree

| Center<br>Number | Atomic<br>number | Coordinates(Angstroms) |           |           |
|------------------|------------------|------------------------|-----------|-----------|
|                  |                  | x                      | y         | z         |
| 1                | 92               | -0.255691              | 0.459014  | 0.170034  |
| 2                | 8                | -0.405564              | -3.93219  | 0.064645  |
| 3                | 8                | 0.157497               | -1.803031 | 0.477323  |
| 4                | 8                | 1.106169               | 2.288438  | -0.594546 |
| 5                | 8                | -0.957606              | 2.73593   | -0.003065 |
| 6                | 6                | 0.317381               | -2.945447 | -0.129544 |
| 7                | 6                | 0.184719               | 3.216751  | -0.449377 |
| 8                | 8                | 0.370646               | 4.421239  | -0.704942 |
| 9                | 8                | 1.336221               | -3.026794 | -0.985199 |
| 10               | 8                | 0.30096                | 0.748814  | 1.861291  |
| 11               | 8                | -0.791004              | 0.131248  | -1.518173 |
| 12               | 6                | -3.597773              | -0.114014 | 0.535215  |
| 13               | 6                | -4.608071              | 0.864591  | 0.612785  |
| 14               | 6                | -3.966786              | -1.398791 | 0.091207  |
| 15               | 6                | -5.922406              | 0.563897  | 0.26165   |
| 16               | 6                | -5.286488              | -1.682116 | -0.255414 |
| 17               | 6                | -6.294674              | -0.713306 | -0.1771   |
| 18               | 1                | -4.344005              | 1.861151  | 0.950475  |
| 19               | 1                | -3.205165              | -2.167805 | 0.021863  |
| 20               | 1                | -6.676006              | 1.34366   | 0.329903  |



|    |   |           |           |           |
|----|---|-----------|-----------|-----------|
| 21 | 1 | -5.535892 | -2.68304  | -0.596883 |
| 22 | 8 | -2.343363 | 0.169121  | 0.889029  |
| 23 | 6 | -7.729452 | -1.040675 | -0.521786 |
| 24 | 1 | -8.28311  | -1.396626 | 0.354955  |
| 25 | 1 | -8.257923 | -0.163008 | -0.902795 |
| 26 | 1 | -7.787624 | -1.825343 | -1.280518 |
| 27 | 6 | 4.377244  | -1.646061 | 0.181499  |
| 28 | 6 | 5.647446  | -1.430074 | 0.714292  |
| 29 | 6 | 3.805706  | -0.751636 | -0.760396 |
| 30 | 1 | 6.04301   | -2.146707 | 1.430268  |
| 31 | 6 | 6.426412  | -0.322845 | 0.355396  |
| 32 | 6 | 4.604988  | 0.363659  | -1.121964 |
| 33 | 1 | 4.205096  | 1.068134  | -1.845224 |
| 34 | 6 | 5.870808  | 0.56378   | -0.578084 |
| 35 | 1 | 6.444318  | 1.433524  | -0.890122 |
| 36 | 1 | 3.806936  | -2.518607 | 0.484896  |
| 37 | 6 | 7.787193  | -0.076486 | 0.967101  |
| 38 | 1 | 7.729259  | 0.584818  | 1.840313  |
| 39 | 1 | 8.248698  | -1.009905 | 1.300578  |
| 40 | 1 | 8.467592  | 0.395943  | 0.252721  |
| 41 | 8 | 2.610464  | -0.932228 | -1.285725 |
| 42 | 1 | 1.89556   | -2.117173 | -1.051527 |

### INT3b

E(B3LYP)= -1849.229704 Hartree

Zero-point correction= 0.289615 (Hartree/Particle)

Sum of electronic and zero-point Energies= -1848.940089 Hartree

Sum of electronic and thermal Enthalpies = -1848.91014 Hartree

Sum of electronic and thermal Free Energies= -1848.984300 Hartree

| Center<br>Number | Atomic<br>number | Coordinates(Angstroms) |           |           |
|------------------|------------------|------------------------|-----------|-----------|
|                  |                  | x                      | y         | z         |
| 1                | 92               | -0.047874              | 0.289103  | -0.01628  |
| 2                | 8                | -0.341379              | -4.281737 | -0.143751 |
| 3                | 8                | -0.115473              | -2.11776  | 0.415028  |
| 4                | 8                | 1.090952               | 2.252481  | -0.895534 |
| 5                | 8                | -0.918641              | 2.54818   | -0.081083 |
| 6                | 6                | 0.200807               | -3.173937 | -0.240164 |
| 7                | 6                | 0.12386                | 3.105359  | -0.654014 |
| 8                | 8                | 0.18665                | 4.321754  | -0.93827  |
| 9                | 8                | 1.239373               | -3.050247 | -1.116884 |
| 10               | 8                | 0.632833               | 0.56604   | 1.636176  |
| 11               | 8                | -0.689834              | -0.045229 | -1.672084 |
| 12               | 6                | -3.431934              | -0.048866 | 0.631136  |

|    |   |           |           |           |
|----|---|-----------|-----------|-----------|
| 13 | 6 | -4.365781 | 0.846902  | 1.199569  |
| 14 | 6 | -3.948953 | -1.092696 | -0.165701 |
| 15 | 6 | -5.732274 | 0.701861  | 0.976201  |
| 16 | 6 | -5.320831 | -1.2238   | -0.377807 |
| 17 | 6 | -6.244777 | -0.333376 | 0.181795  |
| 18 | 1 | -3.995189 | 1.654412  | 1.822754  |
| 19 | 1 | -3.258885 | -1.801738 | -0.609511 |
| 20 | 1 | -6.417746 | 1.410449  | 1.433912  |
| 21 | 1 | -5.680128 | -2.044081 | -0.993611 |
| 22 | 8 | -2.133891 | 0.084356  | 0.865639  |
| 23 | 6 | -7.728287 | -0.466212 | -0.076143 |
| 24 | 1 | -7.979146 | -1.467078 | -0.435955 |
| 25 | 1 | -8.31202  | -0.279139 | 0.829855  |
| 26 | 1 | -8.072704 | 0.248102  | -0.833086 |
| 27 | 6 | 4.158939  | -1.533475 | -0.003722 |
| 28 | 6 | 5.486482  | -1.370719 | 0.391716  |
| 29 | 6 | 3.345856  | -0.419146 | -0.298354 |
| 30 | 1 | 6.081075  | -2.254362 | 0.607967  |
| 31 | 6 | 6.069696  | -0.10455  | 0.516246  |
| 32 | 6 | 3.933524  | 0.857852  | -0.179441 |
| 33 | 1 | 3.321828  | 1.722302  | -0.40887  |
| 34 | 6 | 5.261022  | 1.000361  | 0.21787   |
| 35 | 1 | 5.680105  | 2.000472  | 0.295645  |
| 36 | 1 | 3.73962   | -2.530152 | -0.091142 |
| 37 | 6 | 7.498311  | 0.066944  | 0.979806  |
| 38 | 1 | 7.554484  | 0.234427  | 2.061973  |
| 39 | 1 | 8.098026  | -0.819662 | 0.758571  |
| 40 | 1 | 7.974796  | 0.924749  | 0.497214  |
| 41 | 8 | 2.077117  | -0.570736 | -0.695897 |
| 42 | 1 | 1.614619  | -2.127969 | -1.018581 |

#### TS4b

E(B3LYP)= -1849.217865 Hartree

Zero-point correction= 0.288969 (Hartree/Particle)

Sum of electronic and zero-point Energies= -1848.928896 Hartree

Sum of electronic and thermal Enthalpies = -1848.89919 Hartree

Sum of electronic and thermal Free Energies= -1848.974060 Hartree

| Center<br>Number | Atomic<br>number | Coordinates(Angstroms) |           |          |
|------------------|------------------|------------------------|-----------|----------|
|                  |                  | x                      | y         | z        |
| 1                | 92               | 0.04183                | 0.663069  | 0.008198 |
| 2                | 8                | 0.086418               | -4.669132 | 1.338544 |
| 3                | 8                | 0.32275                | -2.825639 | 0.054835 |
| 4                | 8                | -1.075631              | 2.517366  | 1.011574 |

|    |   |           |           |           |
|----|---|-----------|-----------|-----------|
| 5  | 8 | 0.912862  | 2.877712  | 0.164859  |
| 6  | 6 | -0.206909 | -3.513304 | 0.963285  |
| 7  | 6 | -0.120598 | 3.39713   | 0.794956  |
| 8  | 8 | -0.186614 | 4.589591  | 1.148076  |
| 9  | 8 | -1.261918 | -2.92386  | 1.656709  |
| 10 | 8 | -0.701297 | 1.053495  | -1.588924 |
| 11 | 8 | 0.767438  | 0.240576  | 1.602576  |
| 12 | 6 | 3.282357  | -0.112872 | -0.799731 |
| 13 | 6 | 4.339175  | 0.797112  | -0.998033 |
| 14 | 6 | 3.613935  | -1.421601 | -0.391982 |
| 15 | 6 | 5.663484  | 0.409556  | -0.797803 |
| 16 | 6 | 4.943123  | -1.790188 | -0.19801  |
| 17 | 6 | 5.998553  | -0.889472 | -0.397518 |
| 18 | 1 | 4.104727  | 1.810563  | -1.306552 |
| 19 | 1 | 2.808613  | -2.130082 | -0.226827 |
| 20 | 1 | 6.45405   | 1.138166  | -0.955583 |
| 21 | 1 | 5.164917  | -2.805692 | 0.11988   |
| 22 | 8 | 2.016621  | 0.251604  | -1.003519 |
| 23 | 6 | 7.437937  | -1.313054 | -0.213905 |
| 24 | 1 | 7.552056  | -1.983739 | 0.642332  |
| 25 | 1 | 7.816957  | -1.8469   | -1.093228 |
| 26 | 1 | 8.088117  | -0.449513 | -0.053409 |
| 27 | 6 | -3.467098 | -1.302968 | -0.98856  |
| 28 | 6 | -4.776227 | -1.390455 | -1.459038 |
| 29 | 6 | -3.152996 | -0.50569  | 0.127885  |
| 30 | 1 | -4.982589 | -2.012007 | -2.325973 |
| 31 | 6 | -5.827298 | -0.697802 | -0.845768 |
| 32 | 6 | -4.206462 | 0.19329   | 0.746512  |
| 33 | 1 | -3.984059 | 0.816873  | 1.60557   |
| 34 | 6 | -5.509778 | 0.096656  | 0.263431  |
| 35 | 1 | -6.29797  | 0.654045  | 0.76211   |
| 36 | 1 | -2.669589 | -1.846008 | -1.484366 |
| 37 | 6 | -7.249761 | -0.82464  | -1.34085  |
| 38 | 1 | -7.809185 | 0.102229  | -1.189157 |
| 39 | 1 | -7.280148 | -1.066495 | -2.406197 |
| 40 | 1 | -7.790381 | -1.618548 | -0.812416 |
| 41 | 8 | -1.901622 | -0.426763 | 0.604208  |
| 42 | 1 | -1.424541 | -2.035013 | 1.268894  |

#### INT4b

E(B3LYP)= -1849.221040 Hartree

Zero-point correction= 0.288717 (Hartree/Particle)

Sum of electronic and zero-point Energies= -1848.932323 Hartree

Sum of electronic and thermal Enthalpies = -1848.901635 Hartree

Sum of electronic and thermal Free Energies= -1848.979210 Hartree

| Center<br>Number | Atomic<br>number | Coordinates(Angstroms) |           |           |
|------------------|------------------|------------------------|-----------|-----------|
|                  |                  | x                      | y         | z         |
| 1                | 92               | -0.227221              | -0.821436 | 0.038983  |
| 2                | 8                | 2.149527               | 3.955003  | 3.525483  |
| 3                | 8                | 1.458067               | 3.724936  | 1.387389  |
| 4                | 8                | 0.731346               | -2.533684 | 1.382858  |
| 5                | 8                | -1.303022              | -2.85952  | 0.626638  |
| 6                | 6                | 1.888244               | 3.305733  | 2.488775  |
| 7                | 6                | -0.307417              | -3.344467 | 1.342819  |
| 8                | 8                | -0.344694              | -4.446104 | 1.918943  |
| 9                | 8                | 2.114236               | 1.932502  | 2.597393  |
| 10               | 8                | 0.438664               | -1.58079  | -1.457075 |
| 11               | 8                | -0.872373              | -0.012862 | 1.515687  |
| 12               | 6                | -3.275163              | 0.370163  | -0.981242 |
| 13               | 6                | -4.45282               | -0.33487  | -0.660732 |
| 14               | 6                | -3.389105              | 1.753425  | -1.220453 |
| 15               | 6                | -5.680164              | 0.319513  | -0.589112 |
| 16               | 6                | -4.625666              | 2.392358  | -1.144338 |
| 17               | 6                | -5.798698              | 1.694504  | -0.831797 |
| 18               | 1                | -4.386149              | -1.40041  | -0.467449 |
| 19               | 1                | -2.494168              | 2.316402  | -1.464566 |
| 20               | 1                | -6.567213              | -0.254753 | -0.335858 |
| 21               | 1                | -4.676614              | 3.461359  | -1.331871 |
| 22               | 8                | -2.101481              | -0.254424 | -1.06874  |
| 23               | 6                | -7.141177              | 2.387403  | -0.78572  |
| 24               | 1                | -7.030513              | 3.454924  | -0.57987  |
| 25               | 1                | -7.675937              | 2.293736  | -1.738139 |
| 26               | 1                | -7.78492               | 1.959965  | -0.01221  |
| 27               | 6                | 2.989946               | 1.230873  | -1.532752 |
| 28               | 6                | 4.176838               | 1.305292  | -2.259085 |
| 29               | 6                | 2.883602               | 0.389475  | -0.410379 |
| 30               | 1                | 4.223419               | 1.960805  | -3.124326 |
| 31               | 6                | 5.305995               | 0.556752  | -1.90339  |
| 32               | 6                | 4.01429                | -0.365105 | -0.049133 |
| 33               | 1                | 3.951008               | -1.021812 | 0.812022  |
| 34               | 6                | 5.194747               | -0.279004 | -0.78522  |
| 35               | 1                | 6.04801                | -0.879502 | -0.482414 |
| 36               | 1                | 2.128148               | 1.820659  | -1.826873 |
| 37               | 6                | 6.599207               | 0.667923  | -2.677977 |
| 38               | 1                | 7.183625               | -0.253113 | -2.610409 |
| 39               | 1                | 6.413905               | 0.87331   | -3.735507 |
| 40               | 1                | 7.228436               | 1.480155  | -2.295869 |
| 41               | 8                | 1.748252               | 0.320732  | 0.303777  |

**1c**

E(B3LYP)= -1661.0335938 Hartree

Zero-point correction=                    0.286151 (Hartree/Particle)

Sum of electronic and zero-point Energies= -1660.747443 Hartree

Sum of electronic and thermal Enthalpies = -1660.72011 Hartree

Sum of electronic and thermal Free Energies= -1660.811334 Hartree

---

| Center<br>Number | Atomic<br>number | Coordinates(Angstroms) |           |           |
|------------------|------------------|------------------------|-----------|-----------|
|                  |                  | x                      | y         | z         |
| 1                | 92               | 0.04984                | -1.04788  | 0.06724   |
| 2                | 8                | 1.939957               | -2.289495 | -0.779828 |
| 3                | 8                | 0.347918               | -3.481992 | 0.133723  |
| 4                | 6                | 1.5248                 | -3.492903 | -0.458257 |
| 5                | 8                | 2.170255               | -4.533686 | -0.687618 |
| 6                | 8                | -0.797068              | -1.203676 | -1.52185  |
| 7                | 8                | 0.841614               | -0.921989 | 1.687464  |
| 8                | 6                | 2.254832               | 1.524591  | -0.40634  |
| 9                | 6                | 2.080393               | 2.556913  | 0.538549  |
| 10               | 6                | 3.508208               | 1.436456  | -1.045011 |
| 11               | 6                | 3.111                  | 3.450259  | 0.821952  |
| 12               | 6                | 4.528741               | 2.3381    | -0.74887  |
| 13               | 6                | 4.356658               | 3.366496  | 0.186034  |
| 14               | 1                | 1.125723               | 2.643011  | 1.046539  |
| 15               | 1                | 3.667787               | 0.647174  | -1.772004 |
| 16               | 1                | 2.940998               | 4.231469  | 1.558038  |
| 17               | 1                | 5.483337               | 2.236484  | -1.257932 |
| 18               | 8                | 1.274371               | 0.673654  | -0.700588 |
| 19               | 6                | 5.456943               | 4.361192  | 0.477269  |
| 20               | 1                | 5.334614               | 5.280664  | -0.107101 |
| 21               | 1                | 5.466739               | 4.649724  | 1.531936  |
| 22               | 1                | 6.439081               | 3.949557  | 0.23187   |
| 23               | 8                | -1.542692              | 0.399355  | 0.75594   |
| 24               | 6                | -2.656463              | 1.021964  | 0.377052  |
| 25               | 6                | -2.625036              | 2.356932  | -0.077495 |
| 26               | 1                | -1.667946              | 2.864675  | -0.135381 |
| 27               | 1                | -3.961777              | -0.642784 | 0.771246  |
| 28               | 1                | -6.025896              | 0.539723  | 0.113994  |
| 29               | 1                | -6.149173              | 3.816564  | -1.583215 |
| 30               | 1                | -6.696098              | 3.717717  | 0.088074  |
| 31               | 1                | -7.106069              | 2.430896  | -1.04424  |
| 32               | 1                | -3.731486              | 4.044578  | -0.792843 |
| 33               | 6                | -3.794963              | 3.016513  | -0.446338 |

|    |   |           |           |           |
|----|---|-----------|-----------|-----------|
| 34 | 6 | -5.046673 | 2.389687  | -0.383753 |
| 35 | 6 | -5.074434 | 1.06184   | 0.059742  |
| 36 | 6 | -3.913392 | 0.386572  | 0.433006  |
| 37 | 6 | -6.314594 | 3.125612  | -0.752084 |
| 38 | 8 | -1.823667 | -2.588471 | 1.171876  |
| 39 | 1 | -2.080854 | -2.437286 | 2.088461  |
| 40 | 1 | -1.285908 | -3.39816  | 1.15082   |

### Asp\*

E(B3LYP)= -228.707038 Hartree

Zero-point correction= 0.048202 (Hartree/Particle)

Sum of electronic and zero-point Energies= -228.658837 Hartree

Sum of electronic and thermal Enthalpies = -228.653531 Hartree

Sum of electronic and thermal Free Energies= -228.669780 Hartree

| Center<br>Number | Atomic<br>number | Coordinates(Angstroms) |           |           |
|------------------|------------------|------------------------|-----------|-----------|
|                  |                  | x                      | y         | z         |
| 1                | 8                | -0.761565              | 1.124142  | 0.001889  |
| 2                | 8                | -0.761477              | -1.124192 | 0.00189   |
| 3                | 6                | -0.187706              | 0.000011  | -0.010352 |
| 4                | 6                | 1.3516                 | 0.000038  | -0.004442 |
| 5                | 1                | 1.698135               | -0.000151 | 1.034792  |
| 6                | 1                | 1.751421               | -0.893055 | -0.488293 |
| 7                | 1                | 1.75141                | 0.893312  | -0.487965 |

### TS1c

E(B3LYP)= -1889.7381101 Hartree

Zero-point correction= 0.334980 (Hartree/Particle)

Sum of electronic and zero-point Energies= -1889.403130Hartree

Sum of electronic and thermal Enthalpies = -1889.370207 Hartree

Sum of electronic and thermal Free Energies= -1889.476014 Hartree

| Center<br>Number | Atomic<br>number | Coordinates(Angstroms) |           |           |
|------------------|------------------|------------------------|-----------|-----------|
|                  |                  | x                      | y         | z         |
| 1                | 92               | 0.059711               | -0.750724 | -0.352492 |
| 2                | 8                | 1.495959               | -2.377568 | -1.409326 |
| 3                | 8                | -0.459515              | -3.111684 | -0.739301 |
| 4                | 6                | 0.6849                 | -3.403497 | -1.338468 |
| 5                | 8                | 0.953248               | -4.53594  | -1.780223 |
| 6                | 8                | -0.565532              | -0.300955 | -1.985158 |
| 7                | 8                | 0.681087               | -1.21908  | 1.282895  |
| 8                | 6                | 3.032026               | 0.915174  | -0.146909 |
| 9                | 6                | 3.060579               | 1.597058  | 1.086567  |
| 10               | 6                | 4.260829               | 0.7283    | -0.812643 |

|    |   |           |           |           |
|----|---|-----------|-----------|-----------|
| 11 | 6 | 4.261404  | 2.0622    | 1.619653  |
| 12 | 6 | 5.452115  | 1.19822   | -0.264363 |
| 13 | 6 | 5.483815  | 1.872907  | 0.963239  |
| 14 | 1 | 2.12804   | 1.762264  | 1.614706  |
| 15 | 1 | 4.261672  | 0.213953  | -1.767976 |
| 16 | 1 | 4.244017  | 2.588464  | 2.570249  |
| 17 | 1 | 6.379522  | 1.038119  | -0.807583 |
| 18 | 8 | 1.894228  | 0.48546   | -0.688281 |
| 19 | 6 | 6.784781  | 2.350597  | 1.566487  |
| 20 | 1 | 7.506656  | 2.625097  | 0.792801  |
| 21 | 1 | 6.630116  | 3.222419  | 2.207349  |
| 22 | 1 | 7.251969  | 1.574019  | 2.183447  |
| 23 | 8 | -0.918116 | 1.090232  | 0.500046  |
| 24 | 6 | -1.678449 | 2.122713  | 0.136226  |
| 25 | 6 | -1.160955 | 3.433713  | 0.121727  |
| 26 | 1 | -0.125156 | 3.588585  | 0.405097  |
| 27 | 1 | -3.445782 | 0.950145  | -0.198001 |
| 28 | 1 | -4.85549  | 2.878896  | -0.853321 |
| 29 | 1 | -3.84393  | 6.443922  | -0.541341 |
| 30 | 1 | -5.208847 | 5.353273  | -0.813852 |
| 31 | 1 | -4.078332 | 5.698302  | -2.120221 |
| 32 | 1 | -1.529221 | 5.512233  | -0.241176 |
| 33 | 6 | -1.960869 | 4.514904  | -0.243139 |
| 34 | 6 | -3.302705 | 4.348727  | -0.609413 |
| 35 | 6 | -3.815504 | 3.045155  | -0.584793 |
| 36 | 6 | -3.031065 | 1.952001  | -0.221925 |
| 37 | 6 | -4.152881 | 5.521815  | -1.040646 |
| 38 | 8 | -0.47572  | -4.105101 | 1.853141  |
| 39 | 1 | -0.086335 | -3.302453 | 2.221897  |
| 40 | 1 | -0.55503  | -3.875538 | 0.902007  |
| 41 | 8 | -3.372964 | -1.249995 | 2.739946  |
| 42 | 6 | -3.83203  | -1.51218  | 1.59428   |
| 43 | 8 | -3.170158 | -1.570373 | 0.521724  |
| 44 | 6 | -5.340483 | -1.808585 | 1.507624  |
| 45 | 1 | -5.693469 | -1.822005 | 0.475379  |
| 46 | 1 | -5.908461 | -1.070458 | 2.079511  |
| 47 | 1 | -5.538569 | -2.787901 | 1.955578  |

### INT1c

E(B3LYP)= -1889.7525328 Hartree

Zero-point correction= 0.335372 (Hartree/Particle)

Sum of electronic and zero-point Energies= -1889.417161Hartree

Sum of electronic and thermal Enthalpies = -1889.383747 Hartree

Sum of electronic and thermal Free Energies= -1889.489937 Hartree

| Center<br>Number | Atomic<br>number | Coordinates(Angstroms) |           |           |
|------------------|------------------|------------------------|-----------|-----------|
|                  |                  | x                      | y         | z         |
| 1                | 92               | -0.003078              | -0.760266 | -0.267073 |
| 2                | 8                | 1.834289               | -1.975184 | -1.34877  |
| 3                | 8                | 0.16427                | -3.20949  | -0.655927 |
| 4                | 6                | 1.339266               | -3.179948 | -1.257368 |
| 5                | 8                | 1.911125               | -4.205522 | -1.686799 |
| 6                | 8                | -0.726356              | -0.487304 | -1.904594 |
| 7                | 8                | 0.714698               | -1.070123 | 1.370008  |
| 8                | 6                | 2.715077               | 1.375703  | -0.237907 |
| 9                | 6                | 2.823307               | 1.929801  | 1.057916  |
| 10               | 6                | 3.862244               | 1.451318  | -1.060369 |
| 11               | 6                | 4.010334               | 2.513741  | 1.495991  |
| 12               | 6                | 5.041358               | 2.037611  | -0.605829 |
| 13               | 6                | 5.148123               | 2.579953  | 0.681532  |
| 14               | 1                | 1.959418               | 1.897679  | 1.712669  |
| 15               | 1                | 3.805946               | 1.043738  | -2.064439 |
| 16               | 1                | 4.050236               | 2.931149  | 2.498902  |
| 17               | 1                | 5.899684               | 2.075963  | -1.271611 |
| 18               | 8                | 1.592717               | 0.832252  | -0.683518 |
| 19               | 6                | 6.441541               | 3.183326  | 1.179882  |
| 20               | 1                | 7.026896               | 3.605765  | 0.358826  |
| 21               | 1                | 6.256787               | 3.980153  | 1.905317  |
| 22               | 1                | 7.072567               | 2.435778  | 1.675278  |
| 23               | 8                | -1.158423              | 1.035421  | 0.547513  |
| 24               | 6                | -2.077741              | 1.936445  | 0.23152   |
| 25               | 6                | -1.819721              | 3.318296  | 0.373085  |
| 26               | 1                | -0.845736              | 3.629775  | 0.736955  |
| 27               | 1                | -3.585962              | 0.512747  | -0.336844 |
| 28               | 1                | -5.294395              | 2.20875   | -0.891074 |
| 29               | 1                | -4.980236              | 5.847971  | -0.176933 |
| 30               | 1                | -6.108278              | 4.563393  | -0.627427 |
| 31               | 1                | -5.010531              | 5.237484  | -1.829184 |
| 32               | 1                | -2.55248               | 5.32194   | 0.185062  |
| 33               | 6                | -2.789471              | 4.268481  | 0.060383  |
| 34               | 6                | -4.058842              | 3.902482  | -0.406406 |
| 35               | 6                | -4.317613              | 2.532196  | -0.540458 |
| 36               | 6                | -3.359841              | 1.567992  | -0.233021 |
| 37               | 6                | -5.093177              | 4.940911  | -0.776726 |
| 38               | 8                | 0.446248               | -4.154103 | 1.913613  |
| 39               | 1                | 0.582413               | -3.269648 | 2.276656  |
| 40               | 1                | 0.298445               | -3.955072 | 0.960911  |
| 41               | 8                | -2.694966              | -1.811001 | 2.529637  |
| 42               | 6                | -2.881452              | -2.108967 | 1.335761  |



|    |   |           |           |          |
|----|---|-----------|-----------|----------|
| 43 | 8 | -2.110249 | -1.802692 | 0.358873 |
| 44 | 6 | -4.120323 | -2.914018 | 0.943141 |
| 45 | 1 | -4.669377 | -2.394309 | 0.15384  |
| 46 | 1 | -4.776184 | -3.076719 | 1.798345 |
| 47 | 1 | -3.811269 | -3.882058 | 0.538403 |

**Prod**

E(B3LYP)= -1813.2754851 Hartree

Zero-point correction= 0.311099 (Hartree/Particle)

Sum of electronic and zero-point Energies= -1812.964386Hartree

Sum of electronic and thermal Enthalpies = -1812.934028 Hartree

Sum of electronic and thermal Free Energies= -1813.033092 Hartree

| Center<br>Number | Atomic<br>number | Coordinates(Angstroms) |           |           |
|------------------|------------------|------------------------|-----------|-----------|
|                  |                  | x                      | y         | z         |
| 1                | 92               | -0.074883              | -0.939343 | -0.158287 |
| 2                | 8                | 1.699341               | -2.332892 | -1.105553 |
| 3                | 8                | -0.124488              | -3.373621 | -0.489465 |
| 4                | 6                | 1.077496               | -3.482369 | -0.99925  |
| 5                | 8                | 1.583884               | -4.574713 | -1.35043  |
| 6                | 8                | -0.775153              | -0.681255 | -1.810539 |
| 7                | 8                | 0.61767                | -1.199768 | 1.493736  |
| 8                | 6                | 2.773755               | 1.025685  | -0.234849 |
| 9                | 6                | 2.965246               | 1.428362  | 1.106649  |
| 10               | 6                | 3.866468               | 1.206898  | -1.11487  |
| 11               | 6                | 4.176975               | 1.970819  | 1.531471  |
| 12               | 6                | 5.070572               | 1.749523  | -0.673044 |
| 13               | 6                | 5.259065               | 2.142506  | 0.659004  |
| 14               | 1                | 2.147359               | 1.305077  | 1.807718  |
| 15               | 1                | 3.746567               | 0.913563  | -2.153045 |
| 16               | 1                | 4.281634               | 2.270218  | 2.571245  |
| 17               | 1                | 5.884103               | 1.872015  | -1.383618 |
| 18               | 8                | 1.630514               | 0.522808  | -0.670479 |
| 19               | 6                | 6.580999               | 2.698455  | 1.137447  |
| 20               | 1                | 7.065443               | 3.301054  | 0.364046  |
| 21               | 1                | 6.450949               | 3.328285  | 2.021358  |
| 22               | 1                | 7.282052               | 1.900178  | 1.409185  |
| 23               | 8                | -1.086677              | 0.986806  | 0.571035  |
| 24               | 6                | -1.879321              | 1.979243  | 0.197312  |
| 25               | 6                | -1.427241              | 3.318368  | 0.214932  |
| 26               | 1                | -0.407062              | 3.515879  | 0.528282  |
| 27               | 1                | -3.590133              | 0.743023  | -0.219158 |
| 28               | 1                | -5.065418              | 2.614978  | -0.866419 |
| 29               | 1                | -4.25884               | 6.205774  | -0.419909 |
| 30               | 1                | -5.538564              | 5.054169  | -0.821174 |

|    |   |           |           |           |
|----|---|-----------|-----------|-----------|
| 31 | 1 | -4.361104 | 5.529159  | -2.04291  |
| 32 | 1 | -1.880834 | 5.384292  | -0.119122 |
| 33 | 6 | -2.266247 | 4.368381  | -0.150709 |
| 34 | 6 | -3.590658 | 4.150161  | -0.55332  |
| 35 | 6 | -4.041262 | 2.823884  | -0.567838 |
| 36 | 6 | -3.215548 | 1.760754  | -0.206194 |
| 37 | 6 | -4.483651 | 5.293337  | -0.979048 |
| 38 | 8 | -2.774157 | -1.852021 | 2.704746  |
| 39 | 6 | -3.022504 | -2.077105 | 1.50519   |
| 40 | 8 | -2.269317 | -1.773107 | 0.515709  |
| 41 | 6 | -4.331863 | -2.769499 | 1.12383   |
| 42 | 1 | -4.905798 | -2.127849 | 0.449654  |
| 43 | 1 | -4.932693 | -2.998389 | 2.004017  |
| 44 | 1 | -4.115035 | -3.694146 | 0.581932  |

## H2O

E(B3LYP)= -76.4664776 Hartree

Zero-point correction= 0.021194 (Hartree/Particle)

Sum of electronic and zero-point Energies= -76.445283 Hartree

Sum of electronic and thermal Enthalpies = -76.441503 Hartree

Sum of electronic and thermal Free Energies= -76.449620 Hartree

| Center<br>Number | Atomic<br>number | Coordinates(Angstroms) |           |           |
|------------------|------------------|------------------------|-----------|-----------|
|                  |                  | x                      | y         | z         |
| 1                | 8                | 0                      | 0         | 0.117999  |
| 2                | 1                | 0                      | 0.762134  | -0.471997 |
| 3                | 1                | 0                      | -0.762134 | -0.471997 |

## COM1

E(B3LYP)= -1496.560233 Hartree

Zero-point correction= 0.078042 (Hartree/Particle)

Sum of electronic and zero-point Energies= -1496.482191 Hartree

Sum of electronic and thermal Enthalpies = -1496.462993 Hartree

Sum of electronic and thermal Free Energies= -1496.509630 Hartree

| Center<br>Number | Atomic<br>number | Coordinates(Angstroms) |           |           |
|------------------|------------------|------------------------|-----------|-----------|
|                  |                  | x                      | y         | z         |
| 1                | 92               | 0.012349               | -0.028811 | 0.042993  |
| 2                | 8                | 0.624622               | 2.3469    | -0.053995 |
| 3                | 8                | -1.961357              | 1.458608  | 0.035344  |
| 4                | 8                | 2.276674               | 0.916448  | -0.047447 |
| 5                | 8                | -2.38815               | -0.682111 | 0.103711  |
| 6                | 8                | 1.767356               | -1.770958 | 0.076046  |
| 7                | 8                | -0.292641              | -2.489722 | 0.154585  |

|    |   |           |           |           |
|----|---|-----------|-----------|-----------|
| 8  | 6 | -2.881851 | 0.535317  | 0.085749  |
| 9  | 6 | 1.921945  | 2.175712  | -0.089926 |
| 10 | 6 | 0.981896  | -2.810394 | 0.144459  |
| 11 | 8 | 1.389859  | -3.995163 | 0.196009  |
| 12 | 8 | 2.74254   | 3.123956  | -0.159523 |
| 13 | 8 | -4.112668 | 0.775308  | 0.11408   |
| 14 | 8 | -0.029161 | -0.100244 | -1.769702 |
| 15 | 8 | 0.045582  | 0.031839  | 1.85591   |
| 16 | 8 | -2.86022  | -3.34271  | 0.428124  |
| 17 | 1 | -3.007099 | -2.37767  | 0.336587  |
| 18 | 1 | -1.881899 | -3.338144 | 0.357722  |

### TS1

E(B3LYP)= -1496.547534 Hartree

Zero-point correction= 0.077604 (Hartree/Particle)

Sum of electronic and zero-point Energies= -1496.469929 Hartree

Sum of electronic and thermal Enthalpies = -1496.451385 Hartree

Sum of electronic and thermal Free Energies= -1496.497270 Hartree

| Center<br>Number | Atomic<br>number | Coordinates(Angstroms) |           |           |
|------------------|------------------|------------------------|-----------|-----------|
|                  |                  | x                      | y         | z         |
| 1                | 92               | 0.126156               | -0.059826 | -0.178858 |
| 2                | 8                | 0.630482               | 2.296347  | -0.129298 |
| 3                | 8                | -2.409023              | 1.458421  | 0.379123  |
| 4                | 8                | 2.343927               | 0.957046  | 0.134562  |
| 5                | 8                | -2.121164              | -0.485461 | -0.637811 |
| 6                | 8                | 1.782057               | -1.837344 | -0.006543 |
| 7                | 8                | -0.297355              | -2.496028 | -0.175879 |
| 8                | 6                | -2.885005              | 0.303885  | 0.11028   |
| 9                | 6                | 1.930205               | 2.194951  | 0.049627  |
| 10               | 6                | 0.958063               | -2.855525 | -0.031095 |
| 11               | 8                | 1.326609               | -4.048092 | 0.070014  |
| 12               | 8                | 2.688242               | 3.188822  | 0.129824  |
| 13               | 8                | -3.998995              | -0.14765  | 0.527464  |
| 14               | 8                | 0.383006               | -0.037769 | -1.97275  |
| 15               | 8                | -0.085703              | -0.11229  | 1.618253  |
| 16               | 8                | -2.95347               | -2.879892 | 0.909     |
| 17               | 1                | -3.362592              | -2.008301 | 0.734531  |
| 18               | 1                | -2.062708              | -2.788237 | 0.518535  |

### INT1

E(B3LYP)= -1496.558202 Hartree

Zero-point correction= 0.077395 (Hartree/Particle)

Sum of electronic and zero-point Energies= -1496.480807 Hartree

Sum of electronic and thermal Enthalpies = -1496.461451 Hartree

Sum of electronic and thermal Free Energies= -1496.506470 Hartree

| Center<br>Number | Atomic<br>number | Coordinates(Angstroms) |           |           |
|------------------|------------------|------------------------|-----------|-----------|
|                  |                  | x                      | y         | z         |
| 1                | 92               | 0.281744               | -0.08724  | 0.252092  |
| 2                | 8                | 0.527491               | 2.304272  | 0.161081  |
| 3                | 8                | -1.908681              | 0.221309  | 0.62926   |
| 4                | 8                | 2.351935               | 1.119394  | -0.151741 |
| 5                | 8                | -3.802639              | -0.644477 | -0.192974 |
| 6                | 8                | 1.914441               | -1.885757 | -0.001478 |
| 7                | 8                | -0.16219               | -2.46611  | 0.405704  |
| 8                | 6                | -3.11867               | 0.401361  | 0.065773  |
| 9                | 6                | 1.822344               | 2.318802  | -0.081962 |
| 10               | 6                | 1.07477                | -2.873999 | 0.179047  |
| 11               | 8                | 1.396318               | -4.079533 | 0.145326  |
| 12               | 8                | 2.476609               | 3.373119  | -0.23106  |
| 13               | 8                | -3.503789              | 1.582484  | -0.153271 |
| 14               | 8                | -0.041055              | -0.1323   | -1.53065  |
| 15               | 8                | 0.598228               | -0.04507  | 2.037845  |
| 16               | 8                | -2.850582              | -3.166387 | 0.182423  |
| 17               | 1                | -3.180244              | -2.239577 | 0.065999  |
| 18               | 1                | -1.883297              | -3.057237 | 0.267563  |

## TS2

E(B3LYP)= -1496.539118 Hartree

Zero-point correction= 0.077302 (Hartree/Particle)

Sum of electronic and zero-point Energies= -1496.461815 Hartree

Sum of electronic and thermal Enthalpies = -1496.443417 Hartree

Sum of electronic and thermal Free Energies= -1496.48802 Hartree

| Center<br>Number | Atomic<br>number | Coordinates(Angstroms) |           |           |
|------------------|------------------|------------------------|-----------|-----------|
|                  |                  | x                      | y         | z         |
| 1                | 92               | 0.004149               | -0.371734 | 0.242914  |
| 2                | 8                | 0.333356               | 2.064684  | 0.325379  |
| 3                | 8                | -2.08309               | 0.655324  | 0.394686  |
| 4                | 8                | 2.117912               | 0.856166  | -0.012793 |
| 5                | 8                | -3.752567              | -0.571027 | -0.456385 |
| 6                | 8                | 2.005807               | -1.829509 | -0.020067 |
| 7                | 8                | 0.079598               | -2.850499 | -0.046381 |
| 8                | 6                | -3.255143              | 0.599313  | -0.223937 |
| 9                | 6                | 1.627404               | 2.060026  | 0.127897  |
| 10               | 6                | 1.384892               | -2.969916 | -0.125812 |
| 11               | 8                | 1.963733               | -4.071451 | -0.286162 |
| 12               | 8                | 2.323236               | 3.104152  | 0.076835  |

|    |   |           |           |           |
|----|---|-----------|-----------|-----------|
| 13 | 8 | -3.842809 | 1.672102  | -0.543692 |
| 14 | 8 | -0.221655 | -0.328041 | -1.55122  |
| 15 | 8 | 0.237336  | -0.42246  | 2.037473  |
| 16 | 8 | -2.141814 | -2.033701 | 0.929779  |
| 17 | 1 | -2.826047 | -1.57875  | 0.340557  |
| 18 | 1 | -1.738436 | -2.774101 | 0.456707  |

## INT2

E(B3LYP)= -1496.53925997 Hartree

Zero-point correction= 0.077536 (Hartree/Particle)

Sum of electronic and zero-point Energies= -1496.461724 Hartree

Sum of electronic and thermal Enthalpies = -1496.442809 Hartree

Sum of electronic and thermal Free Energies= -1496.488500 Hartree

| Center<br>Number | Atomic<br>number | Coordinates(Angstroms) |           |           |
|------------------|------------------|------------------------|-----------|-----------|
|                  |                  | x                      | y         | z         |
| 1                | 92               | 0.150933               | 0.022567  | 0.097946  |
| 2                | 8                | -0.776308              | 2.315141  | 0.11637   |
| 3                | 8                | -2.200423              | -0.049549 | 0.311545  |
| 4                | 8                | 1.366062               | 2.134151  | -0.241663 |
| 5                | 8                | -3.107167              | -1.95333  | -0.448666 |
| 6                | 8                | 2.604671               | -0.197832 | -0.228057 |
| 7                | 8                | 1.50485                | -2.075459 | -0.103339 |
| 8                | 6                | -3.237558              | -0.6864   | -0.202809 |
| 9                | 6                | 0.348676               | 2.943619  | -0.106724 |
| 10               | 6                | 2.671112               | -1.49898  | -0.268468 |
| 11               | 8                | 3.735844               | -2.140323 | -0.445853 |
| 12               | 8                | 0.442045               | 4.194586  | -0.183247 |
| 13               | 8                | -4.314902              | -0.060556 | -0.422442 |
| 14               | 8                | -0.106688              | -0.133315 | -1.686505 |
| 15               | 8                | 0.409581               | 0.15042   | 1.886367  |
| 16               | 8                | -0.880057              | -2.357083 | 0.698501  |
| 17               | 1                | -1.766805              | -2.332269 | 0.191286  |
| 18               | 1                | -0.232524              | -2.908161 | 0.241647  |

## TS3

E(B3LYP)= -1496.53695 Hartree

Zero-point correction= 0.073538 (Hartree/Particle)

Sum of electronic and zero-point Energies= -1496.463412 Hartree

Sum of electronic and thermal Enthalpies = -1496.444783 Hartree

Sum of electronic and thermal Free Energies= -1496.490610 Hartree

| Center<br>Number | Atomic<br>number | Coordinates(Angstroms) |   |   |
|------------------|------------------|------------------------|---|---|
|                  |                  | x                      | y | z |

|    |    |           |           |           |
|----|----|-----------|-----------|-----------|
| 1  | 92 | 0.014393  | -0.444024 | 0.218363  |
| 2  | 8  | 0.311962  | 2.001801  | 0.204965  |
| 3  | 8  | -2.112578 | 0.845524  | 0.355681  |
| 4  | 8  | 2.143218  | 0.834039  | 0.021379  |
| 5  | 8  | -3.788787 | -0.465214 | -0.357298 |
| 6  | 8  | 2.065279  | -1.814535 | -0.015714 |
| 7  | 8  | 0.20955   | -2.949708 | 0.092856  |
| 8  | 6  | -3.323868 | 0.751695  | -0.094606 |
| 9  | 6  | 1.613213  | 2.025355  | 0.075559  |
| 10 | 6  | 1.510503  | -2.995083 | -0.036992 |
| 11 | 8  | 2.155196  | -4.065972 | -0.167641 |
| 12 | 8  | 2.281055  | 3.089226  | 0.008076  |
| 13 | 8  | -4.061012 | 1.753383  | -0.279539 |
| 14 | 8  | -0.178558 | -0.443367 | -1.582186 |
| 15 | 8  | 0.200346  | -0.446016 | 2.021111  |
| 16 | 8  | -2.025297 | -1.811787 | 0.525172  |
| 17 | 1  | -2.956905 | -1.223631 | 0.02963   |
| 18 | 1  | -1.80717  | -2.678555 | 0.167387  |

### INT3

E(B3LYP)= -1496.53807764 Hartree

Zero-point correction= 0.077078 (Hartree/Particle)

Sum of electronic and zero-point Energies= -1496.461 Hartree

Sum of electronic and thermal Enthalpies = -1496.442044 Hartree

Sum of electronic and thermal Free Energies= -1496.488470 Hartree

| Center<br>Number | Atomic<br>number | Coordinates(Angstroms) |           |           |
|------------------|------------------|------------------------|-----------|-----------|
|                  |                  | x                      | y         | z         |
| 1                | 92               | 0.014656               | -0.482699 | 0.204648  |
| 2                | 8                | 0.28871                | 1.969079  | 0.180943  |
| 3                | 8                | -2.161074              | 0.910397  | 0.352298  |
| 4                | 8                | 2.139302               | 0.825457  | 0.034336  |
| 5                | 8                | -3.853834              | -0.382522 | -0.373443 |
| 6                | 8                | 2.079722               | -1.825007 | -0.032103 |
| 7                | 8                | 0.248664               | -2.995223 | 0.113665  |
| 8                | 6                | -3.362211              | 0.848253  | -0.077147 |
| 9                | 6                | 1.591137               | 2.008283  | 0.073089  |
| 10               | 6                | 1.549125               | -3.017    | -0.022644 |
| 11               | 8                | 2.215554               | -4.077255 | -0.132617 |
| 12               | 8                | 2.24551                | 3.081993  | 0.011233  |
| 13               | 8                | -4.123022              | 1.826833  | -0.243366 |
| 14               | 8                | -0.162229              | -0.466433 | -1.599538 |
| 15               | 8                | 0.199377               | -0.472076 | 2.008957  |
| 16               | 8                | -1.981437              | -1.774588 | 0.460855  |

|    |   |           |           |           |
|----|---|-----------|-----------|-----------|
| 17 | 1 | -3.126153 | -1.06577  | -0.084647 |
| 18 | 1 | -1.733011 | -2.678292 | 0.241778  |

#### TS4

E(B3LYP)= -1496.536516 Hartree

Zero-point correction= 0.077229 (Hartree/Particle)

Sum of electronic and zero-point Energies= -1496.459287 Hartree

Sum of electronic and thermal Enthalpies = -1496.441138 Hartree

Sum of electronic and thermal Free Energies= -1496.487450 Hartree

| Center<br>Number | Atomic<br>number | Coordinates(Angstroms) |           |           |
|------------------|------------------|------------------------|-----------|-----------|
|                  |                  | x                      | y         | z         |
| 1                | 92               | 0.19888                | -0.548676 | 0.22252   |
| 2                | 8                | 0.363498               | 1.864056  | 0.434906  |
| 3                | 8                | -2.385491              | 1.096152  | -0.03636  |
| 4                | 8                | 2.233929               | 0.833709  | -0.029414 |
| 5                | 8                | -3.979309              | -0.488582 | -0.13668  |
| 6                | 8                | 2.192169               | -1.898913 | -0.143093 |
| 7                | 8                | 0.334552               | -3.029696 | 0.053792  |
| 8                | 6                | -3.599265              | 0.825699  | -0.259271 |
| 9                | 6                | 1.651682               | 1.977105  | 0.215813  |
| 10               | 6                | 1.628945               | -3.080592 | -0.139853 |
| 11               | 8                | 2.262644               | -4.150312 | -0.305413 |
| 12               | 8                | 2.258301               | 3.075882  | 0.239519  |
| 13               | 8                | -4.506073              | 1.632086  | -0.582742 |
| 14               | 8                | -0.050838              | -0.464103 | -1.56981  |
| 15               | 8                | 0.50003                | -0.622299 | 2.009534  |
| 16               | 8                | -1.835455              | -1.639058 | 0.6122    |
| 17               | 1                | -3.153087              | -1.011519 | 0.147151  |
| 18               | 1                | -1.67346               | -2.586073 | 0.545211  |

#### INT4

E(B3LYP)= -1496.551553 Hartree

Zero-point correction= 0.076689 (Hartree/Particle)

Sum of electronic and zero-point Energies= -1496.474864 Hartree

Sum of electronic and thermal Enthalpies = -1496.455225 Hartree

Sum of electronic and thermal Free Energies= -1496.505290 Hartree

| Center<br>Number | Atomic<br>number | Coordinates(Angstroms) |           |           |
|------------------|------------------|------------------------|-----------|-----------|
|                  |                  | x                      | y         | z         |
| 1                | 92               | 0.693069               | -0.679686 | 0.264408  |
| 2                | 8                | 0.86536                | 1.695026  | 0.612038  |
| 3                | 8                | -4.82787               | 0.505785  | 0.813731  |
| 4                | 8                | 2.733162               | 0.645701  | 0.12416   |
| 5                | 8                | -3.574968              | 0.061891  | -1.011704 |

|    |   |           |           |           |
|----|---|-----------|-----------|-----------|
| 6  | 8 | 2.403209  | -2.323805 | -0.288546 |
| 7  | 8 | 0.3393    | -3.040985 | -0.051878 |
| 8  | 6 | -4.779258 | 0.443048  | -0.441356 |
| 9  | 6 | 2.162434  | 1.79455   | 0.400875  |
| 10 | 6 | 1.593245  | -3.356176 | -0.306836 |
| 11 | 8 | 1.968856  | -4.52543  | -0.540982 |
| 12 | 8 | 2.781091  | 2.879244  | 0.459682  |
| 13 | 8 | -5.696114 | 0.684575  | -1.262271 |
| 14 | 8 | 0.362472  | -0.392816 | -1.495506 |
| 15 | 8 | 0.974141  | -0.961604 | 2.033791  |
| 16 | 8 | -1.538231 | -0.48332  | 0.660231  |
| 17 | 1 | -2.893145 | -0.113441 | -0.307417 |
| 18 | 1 | -1.848518 | -0.570234 | 1.567364  |

## COM2

E(B3LYP)= -1578.798386 Hartree

Zero-point correction= 0.181518 (Hartree/Particle)

Sum of electronic and zero-point Energies= -1578.616868 Hartree

Sum of electronic and thermal Enthalpies = -1578.593285 Hartree

Sum of electronic and thermal Free Energies= -1578.65452 Hartree

| Center<br>Number | Atomic<br>number | Coordinates(Angstroms) |           |           |
|------------------|------------------|------------------------|-----------|-----------|
|                  |                  | x                      | y         | z         |
| 1                | 92               | -1.800997              | -0.021088 | 0.232144  |
| 2                | 8                | -0.73766               | 1.754727  | 1.453894  |
| 3                | 8                | -2.890931              | 1.977565  | 1.079898  |
| 4                | 8                | -4.11237               | -0.32847  | -0.448959 |
| 5                | 8                | -2.671037              | -1.890913 | -1.00294  |
| 6                | 6                | -1.813491              | 2.498342  | 1.619765  |
| 7                | 6                | -3.923158              | -1.481912 | -1.047191 |
| 8                | 8                | -4.833765              | -2.131363 | -1.603492 |
| 9                | 8                | -1.801986              | 3.587851  | 2.230912  |
| 10               | 8                | -2.125955              | -0.894263 | 1.785941  |
| 11               | 8                | -1.418568              | 0.825244  | -1.323458 |
| 12               | 8                | 0.250707               | -1.049868 | 0.123166  |
| 13               | 1                | 0.446728               | -1.69062  | 0.814739  |
| 14               | 6                | 4.558709               | -0.471177 | -1.802293 |
| 15               | 6                | 3.44551                | -0.599114 | -0.958921 |
| 16               | 6                | 5.836532               | -0.329131 | -1.268849 |
| 17               | 1                | 6.679813               | -0.229085 | -1.945994 |
| 18               | 6                | 3.651104               | -0.573934 | 0.427556  |
| 19               | 6                | 6.058989               | -0.311643 | 0.114848  |
| 20               | 1                | 2.802524               | -0.658371 | 1.096456  |
| 21               | 6                | 4.939684               | -0.432911 | 0.944391  |



|    |   |          |           |           |
|----|---|----------|-----------|-----------|
| 22 | 1 | 5.070339 | -0.41506  | 2.02239   |
| 23 | 1 | 4.406513 | -0.481654 | -2.876187 |
| 24 | 6 | 7.454141 | -0.191981 | 0.683405  |
| 25 | 1 | 7.432558 | 0.169467  | 1.714167  |
| 26 | 1 | 7.96952  | -1.159198 | 0.687139  |
| 27 | 1 | 8.067318 | 0.497278  | 0.096637  |
| 28 | 8 | 2.222292 | -0.737295 | -1.523671 |
| 29 | 1 | 1.487922 | -0.856307 | -0.835374 |

## TS5

E(B3LYP)= -1578.777819 Hartree

Zero-point correction= 0.181126 (Hartree/Particle)

Sum of electronic and zero-point Energies= -1578.596693 Hartree

Sum of electronic and thermal Enthalpies = -1578.574274 Hartree

Sum of electronic and thermal Free Energies= -1578.63192 Hartree

| Center<br>Number | Atomic<br>number | Coordinates(Angstroms) |           |           |
|------------------|------------------|------------------------|-----------|-----------|
|                  |                  | x                      | y         | z         |
| 1                | 92               | -1.110956              | -0.002913 | 0.015358  |
| 2                | 8                | 0.225093               | 1.983608  | -0.086399 |
| 3                | 8                | -1.938902              | 2.26818   | 0.022864  |
| 4                | 8                | -3.506851              | 0.004054  | 0.184948  |
| 5                | 8                | -2.556857              | -1.959765 | 0.097054  |
| 6                | 6                | -0.765038              | 2.848711  | -0.03456  |
| 7                | 6                | -3.686858              | -1.296484 | 0.17002   |
| 8                | 8                | -4.808412              | -1.842883 | 0.22033   |
| 9                | 8                | -0.59922               | 4.08622   | -0.040096 |
| 10               | 8                | -0.96463               | 0.027191  | 1.813331  |
| 11               | 8                | -1.23786               | -0.071516 | -1.779236 |
| 12               | 8                | 0.083419               | -2.290707 | 0.165292  |
| 13               | 1                | -0.399833              | -2.920424 | -0.380123 |
| 14               | 6                | 3.475331               | 0.724027  | -0.334013 |
| 15               | 6                | 2.906384               | -0.563757 | -0.499323 |
| 16               | 6                | 4.813689               | 0.88606   | 0.01638   |
| 17               | 1                | 5.206296               | 1.893482  | 0.134341  |
| 18               | 6                | 3.771988               | -1.664178 | -0.276043 |
| 19               | 6                | 5.666903               | -0.206859 | 0.226435  |
| 20               | 1                | 3.373518               | -2.66872  | -0.386906 |
| 21               | 6                | 5.108649               | -1.482257 | 0.07564   |
| 22               | 1                | 5.733069               | -2.357765 | 0.237037  |
| 23               | 1                | 2.831912               | 1.585629  | -0.472906 |
| 24               | 6                | 7.127154               | -0.016591 | 0.569939  |
| 25               | 1                | 7.524092               | -0.879961 | 1.110804  |
| 26               | 1                | 7.744579               | 0.113738  | -0.327297 |

|    |   |          |           |           |
|----|---|----------|-----------|-----------|
| 27 | 1 | 7.280023 | 0.868243  | 1.194488  |
| 28 | 8 | 1.644752 | -0.730567 | -0.853184 |
| 29 | 1 | 0.879592 | -1.887285 | -0.352064 |

### TS1b'

E(B3LYP)= -1731.007361 Hartree

Zero-point correction= 0.206514 (Hartree/Particle)

Sum of electronic and zero-point Energies= -1730.800847 Hartree

Sum of electronic and thermal Enthalpies = -1730.774601 Hartree

Sum of electronic and thermal Free Energies= -1730.840420 Hartree

| Center<br>Number | Atomic<br>number | Coordinates(Angstroms) |           |           |
|------------------|------------------|------------------------|-----------|-----------|
|                  |                  | x                      | y         | z         |
| 1                | 92               | 0.787659               | -0.401115 | -0.020459 |
| 2                | 8                | 2.373804               | 1.173784  | 1.014468  |
| 3                | 8                | 3.074885               | -0.882738 | 0.814228  |
| 4                | 8                | 1.422029               | -2.780726 | -0.015341 |
| 5                | 8                | -0.553819              | -2.330216 | -0.82004  |
| 6                | 6                | 3.343429               | 0.324055  | 1.232931  |
| 7                | 6                | 0.324759               | -3.256543 | -0.541705 |
| 8                | 8                | 0.133729               | -4.481229 | -0.757753 |
| 9                | 8                | 4.426619               | 0.640389  | 1.79      |
| 10               | 8                | 1.475102               | -0.223538 | -1.687839 |
| 11               | 8                | 0.116673               | -0.615383 | 1.647439  |
| 12               | 6                | -2.579483              | 0.326982  | -0.305042 |
| 13               | 6                | -2.956136              | 0.70928   | 1.007302  |
| 14               | 6                | -3.637423              | 0.028999  | -1.199408 |
| 15               | 6                | -4.293983              | 0.779619  | 1.386731  |
| 16               | 6                | -4.971007              | 0.104314  | -0.801471 |
| 17               | 6                | -5.335635              | 0.477008  | 0.498676  |
| 18               | 1                | -2.173381              | 0.944733  | 1.719461  |
| 19               | 1                | -3.386748              | -0.260558 | -2.21541  |
| 20               | 1                | -4.535193              | 1.08109   | 2.403401  |
| 21               | 1                | -5.748963              | -0.13259  | -1.523212 |
| 22               | 8                | -1.325188              | 0.272825  | -0.694688 |
| 23               | 6                | -6.782434              | 0.521439  | 0.935409  |
| 24               | 1                | -7.45072               | 0.672177  | 0.083463  |
| 25               | 1                | -7.088771              | -0.41072  | 1.425613  |
| 26               | 1                | -6.961206              | 1.331325  | 1.648535  |
| 27               | 8                | 0.377264               | 2.46909   | -0.369168 |
| 28               | 6                | 1.082871               | 3.469688  | -0.669438 |
| 29               | 8                | 1.039113               | 4.594482  | -0.093846 |
| 30               | 6                | 2.055974               | 3.3446    | -1.851701 |
| 31               | 1                | 1.741686               | 4.025403  | -2.649506 |

|    |   |          |          |           |
|----|---|----------|----------|-----------|
| 32 | 1 | 2.093005 | 2.327688 | -2.24099  |
| 33 | 1 | 3.058378 | 3.653471 | -1.542489 |

**INT1b'**

E(B3LYP)= -1731.009280 Hartree

Zero-point correction= 0.206322 (Hartree/Particle)

Sum of electronic and zero-point Energies= -1730.802958 Hartree

Sum of electronic and thermal Enthalpies = -1730.775633 Hartree

Sum of electronic and thermal Free Energies= -1730.844120 Hartree

| Center<br>Number | Atomic<br>number | Coordinates(Angstroms) |           |           |
|------------------|------------------|------------------------|-----------|-----------|
|                  |                  | x                      | y         | z         |
| 1                | 92               | 0.872737               | -0.290844 | -0.029366 |
| 2                | 8                | 2.622121               | 1.357286  | 0.655449  |
| 3                | 8                | 3.240778               | -0.730695 | 0.624173  |
| 4                | 8                | 1.639728               | -2.657829 | -0.057124 |
| 5                | 8                | -0.431789              | -2.33866  | -0.6484   |
| 6                | 6                | 3.588462               | 0.504267  | 0.857996  |
| 7                | 6                | 0.524941               | -3.204513 | -0.458862 |
| 8                | 8                | 0.387646               | -4.443549 | -0.645965 |
| 9                | 8                | 4.741121               | 0.83964   | 1.242929  |
| 10               | 8                | 1.396281               | -0.101557 | -1.754602 |
| 11               | 8                | 0.366675               | -0.480413 | 1.700529  |
| 12               | 6                | -2.595731              | 0.135494  | -0.334871 |
| 13               | 6                | -2.987025              | -0.06132  | 1.016861  |
| 14               | 6                | -3.652424              | 0.329677  | -1.264547 |
| 15               | 6                | -4.327479              | -0.061783 | 1.393907  |
| 16               | 6                | -4.987701              | 0.324823  | -0.86727  |
| 17               | 6                | -5.363598              | 0.126988  | 0.468067  |
| 18               | 1                | -2.208196              | -0.21049  | 1.756798  |
| 19               | 1                | -3.395125              | 0.490156  | -2.307522 |
| 20               | 1                | -4.576111              | -0.212922 | 2.442088  |
| 21               | 1                | -5.75928               | 0.480969  | -1.617655 |
| 22               | 8                | -1.347051              | 0.154819  | -0.72448  |
| 23               | 6                | -6.815918              | 0.086875  | 0.887004  |
| 24               | 1                | -7.45069               | 0.614267  | 0.169846  |
| 25               | 1                | -7.193582              | -0.940662 | 0.957854  |
| 26               | 1                | -6.964479              | 0.549406  | 1.86733   |
| 27               | 8                | 0.174668               | 2.189613  | 0.16283   |
| 28               | 6                | 0.443922               | 3.341438  | -0.287041 |
| 29               | 8                | 0.16116                | 4.419353  | 0.299688  |
| 30               | 6                | 1.131266               | 3.449207  | -1.651691 |
| 31               | 1                | 0.474567               | 3.987008  | -2.342658 |
| 32               | 1                | 1.370358               | 2.471345  | -2.065931 |

**COMIC'**

E(B3LYP)= -2077.919358 Hartree

Zero-point correction=                    0.338954 (Hartree/Particle)

Sum of electronic and zero-point Energies= -2077.580404 Hartree

Sum of electronic and thermal Enthalpies = -2077.54452 Hartree

Sum of electronic and thermal Free Energies= -2077.632630 Hartree

---

| Center<br>Number | Atomic<br>number | Coordinates(Angstroms) |           |           |
|------------------|------------------|------------------------|-----------|-----------|
|                  |                  | x                      | y         | z         |
| 1                | 92               | -1.481529              | -0.898458 | -0.049526 |
| 2                | 8                | -3.56492               | -2.213507 | -0.39268  |
| 3                | 8                | -1.699105              | -3.298028 | -0.686947 |
| 4                | 8                | 0.645343               | -2.212613 | -0.324059 |
| 5                | 8                | 0.926116               | -0.100521 | 0.143481  |
| 6                | 6                | -3.002617              | -3.354192 | -0.688887 |
| 7                | 6                | 1.47399                | -1.244739 | -0.103685 |
| 8                | 8                | 2.741108               | -1.415993 | -0.128047 |
| 9                | 8                | -3.652471              | -4.400792 | -0.949604 |
| 10               | 8                | -1.516635              | -1.367836 | 1.698193  |
| 11               | 8                | -1.431843              | -0.454074 | -1.802786 |
| 12               | 6                | -1.114883              | 2.562599  | 0.258205  |
| 13               | 6                | -1.096241              | 2.906494  | -1.117608 |
| 14               | 6                | -0.98596               | 3.644155  | 1.17167   |
| 15               | 6                | -0.958015              | 4.229212  | -1.535364 |
| 16               | 6                | -0.849275              | 4.958379  | 0.734998  |
| 17               | 6                | -0.829366              | 5.288558  | -0.628291 |
| 18               | 1                | -1.198202              | 2.109495  | -1.84583  |
| 19               | 1                | -1.000904              | 3.421707  | 2.234624  |
| 20               | 1                | -0.952158              | 4.443009  | -2.601751 |
| 21               | 1                | -0.756979              | 5.750412  | 1.474697  |
| 22               | 8                | -1.249512              | 1.334203  | 0.692371  |
| 23               | 6                | -0.651256              | 6.716607  | -1.092448 |
| 24               | 1                | -1.264794              | 7.410728  | -0.509658 |
| 25               | 1                | 0.3886                 | 7.051627  | -0.996038 |
| 26               | 1                | -0.930742              | 6.82786   | -2.143371 |
| 27               | 8                | -3.688036              | 0.385337  | 0.037024  |
| 28               | 6                | -4.743863              | 0.570538  | 0.710712  |
| 29               | 8                | -5.759649              | 1.17954   | 0.28548   |
| 30               | 6                | -4.800049              | 0.032581  | 2.143861  |
| 31               | 1                | -5.063976              | 0.843669  | 2.828119  |
| 32               | 1                | -3.855391              | -0.413822 | 2.450453  |
| 33               | 1                | -5.590848              | -0.719848 | 2.215412  |

|    |   |           |           |           |
|----|---|-----------|-----------|-----------|
| 34 | 6 | 6.624765  | 1.093061  | 0.642921  |
| 35 | 1 | 6.323748  | 2.07795   | 0.9837    |
| 36 | 6 | 5.633151  | 0.152432  | 0.327686  |
| 37 | 8 | 4.336124  | 0.511138  | 0.458069  |
| 38 | 6 | 6.033981  | -1.121575 | -0.103622 |
| 39 | 1 | 5.27922   | -1.861433 | -0.343729 |
| 40 | 6 | 7.38973   | -1.430728 | -0.214805 |
| 41 | 1 | 7.672798  | -2.425353 | -0.547319 |
| 42 | 6 | 7.973343  | 0.766003  | 0.525471  |
| 43 | 6 | 8.388604  | -0.499882 | 0.091908  |
| 44 | 1 | 8.718886  | 1.513856  | 0.779896  |
| 45 | 6 | 9.853914  | -0.835765 | -0.064284 |
| 46 | 1 | 10.034524 | -1.904255 | 0.07715   |
| 47 | 1 | 10.466524 | -0.291148 | 0.658763  |
| 48 | 1 | 10.221751 | -0.57386  | -1.063124 |
| 49 | 1 | 3.693529  | -0.246754 | 0.218828  |

### TS1c'

E(B3LYP)= -2077.914944 Hartree

Zero-point correction= 0.338045 (Hartree/Particle)

Sum of electronic and zero-point Energies= -2077.576899 Hartree

Sum of electronic and thermal Enthalpies = -2077.541621 Hartree

Sum of electronic and thermal Free Energies= -2077.629320 Hartree

| Center<br>Number | Atomic<br>number | Coordinates(Angstroms) |           |           |
|------------------|------------------|------------------------|-----------|-----------|
|                  |                  | x                      | y         | z         |
| 1                | 92               | -1.784436              | -0.48746  | 0.028938  |
| 2                | 8                | -4.115685              | -0.686847 | -0.840028 |
| 3                | 8                | -3.010163              | -2.5343   | -0.4894   |
| 4                | 8                | -0.178488              | -2.937428 | -0.616261 |
| 5                | 8                | 0.33918                | -1.365043 | 0.847     |
| 6                | 6                | -4.141954              | -1.990676 | -0.862537 |
| 7                | 6                | 0.655666               | -2.472176 | 0.22105   |
| 8                | 8                | 1.786585               | -3.042347 | 0.472792  |
| 9                | 8                | -5.146901              | -2.663749 | -1.20637  |
| 10               | 8                | -2.395831              | -0.704145 | 1.716555  |
| 11               | 8                | -1.202152              | -0.238029 | -1.66232  |
| 12               | 6                | 0.442465               | 2.167866  | 0.401716  |
| 13               | 6                | 0.982291               | 2.204501  | -0.908189 |
| 14               | 6                | 0.903639               | 3.164954  | 1.29871   |
| 15               | 6                | 1.917665               | 3.167808  | -1.27981  |
| 16               | 6                | 1.839791               | 4.119639  | 0.908531  |
| 17               | 6                | 2.374784               | 4.145844  | -0.386598 |
| 18               | 1                | 0.641758               | 1.465412  | -1.624332 |

|    |   |           |           |           |
|----|---|-----------|-----------|-----------|
| 19 | 1 | 0.505135  | 3.173077  | 2.308833  |
| 20 | 1 | 2.301747  | 3.159036  | -2.297231 |
| 21 | 1 | 2.161012  | 4.866305  | 1.630797  |
| 22 | 8 | -0.440844 | 1.273217  | 0.789142  |
| 23 | 6 | 3.4181    | 5.162112  | -0.792136 |
| 24 | 1 | 3.29999   | 6.098183  | -0.239289 |
| 25 | 1 | 4.435784  | 4.800802  | -0.600029 |
| 26 | 1 | 3.356021  | 5.393375  | -1.85914  |
| 27 | 8 | -2.978599 | 1.668755  | -0.187222 |
| 28 | 6 | -4.027454 | 2.317218  | 0.132118  |
| 29 | 8 | -4.43013  | 3.336852  | -0.474447 |
| 30 | 6 | -4.829738 | 1.806962  | 1.327012  |
| 31 | 1 | -5.605031 | 2.51805   | 1.613414  |
| 32 | 1 | -4.171115 | 1.612435  | 2.175968  |
| 33 | 1 | -5.290225 | 0.854785  | 1.052471  |
| 34 | 6 | 5.837635  | -0.982814 | 1.541655  |
| 35 | 1 | 5.843451  | -0.819531 | 2.614198  |
| 36 | 6 | 4.706643  | -1.569569 | 0.95179   |
| 37 | 8 | 3.668168  | -1.916604 | 1.741228  |
| 38 | 6 | 4.709121  | -1.766173 | -0.438581 |
| 39 | 1 | 3.841685  | -2.214881 | -0.908643 |
| 40 | 6 | 5.814098  | -1.387389 | -1.201404 |
| 41 | 1 | 5.787176  | -1.548412 | -2.275404 |
| 42 | 6 | 6.931381  | -0.611833 | 0.76386   |
| 43 | 6 | 6.948461  | -0.806782 | -0.623841 |
| 44 | 1 | 7.790446  | -0.15719  | 1.249045  |
| 45 | 6 | 8.152645  | -0.428843 | -1.455686 |
| 46 | 1 | 7.878556  | -0.273767 | -2.502037 |
| 47 | 1 | 8.919631  | -1.211592 | -1.432481 |
| 48 | 1 | 8.619064  | 0.489876  | -1.089785 |
| 49 | 1 | 2.88051   | -2.326201 | 1.210044  |

### INT1c'

E(B3LYP)= -2077.930342 Hartree

Zero-point correction= 0.338126 (Hartree/Particle)

Sum of electronic and zero-point Energies= -2077.592216 Hartree

Sum of electronic and thermal Enthalpies = -2077.556212 Hartree

Sum of electronic and thermal Free Energies= -2077.644200 Hartree

| Center<br>Number | Atomic<br>number | Coordinates(Angstroms) |           |           |
|------------------|------------------|------------------------|-----------|-----------|
|                  |                  | x                      | y         | z         |
| 1                | 92               | -1.819057              | -0.349301 | -0.04271  |
| 2                | 8                | -4.215463              | -0.869843 | 0.043583  |
| 3                | 8                | -2.895256              | -2.420139 | -0.761843 |

|    |   |           |           |           |
|----|---|-----------|-----------|-----------|
| 4  | 8 | 0.222136  | -2.236378 | -2.976521 |
| 5  | 8 | -0.074038 | -1.596131 | -0.842917 |
| 6  | 6 | -4.124974 | -2.07514  | -0.461311 |
| 7  | 6 | 0.707949  | -1.983725 | -1.840609 |
| 8  | 8 | 1.970235  | -2.096381 | -1.58244  |
| 9  | 8 | -5.113579 | -2.826512 | -0.638172 |
| 10 | 8 | -1.590702 | -1.07444  | 1.603748  |
| 11 | 8 | -2.07978  | 0.391626  | -1.674523 |
| 12 | 6 | 0.664497  | 2.088715  | -0.107051 |
| 13 | 6 | 0.652883  | 2.432781  | -1.478757 |
| 14 | 6 | 1.541011  | 2.824487  | 0.724585  |
| 15 | 6 | 1.471569  | 3.445117  | -1.97519  |
| 16 | 6 | 2.352205  | 3.833765  | 0.210839  |
| 17 | 6 | 2.342628  | 4.168108  | -1.149689 |
| 18 | 1 | -0.017421 | 1.894789  | -2.13946  |
| 19 | 1 | 1.568196  | 2.587749  | 1.783685  |
| 20 | 1 | 1.429616  | 3.680034  | -3.03592  |
| 21 | 1 | 3.008711  | 4.375717  | 0.886885  |
| 22 | 8 | -0.097453 | 1.132097  | 0.397636  |
| 23 | 6 | 3.252998  | 5.23876   | -1.706775 |
| 24 | 1 | 3.47464   | 6.003379  | -0.957386 |
| 25 | 1 | 4.212706  | 4.823801  | -2.037623 |
| 26 | 1 | 2.803052  | 5.735705  | -2.570578 |
| 27 | 8 | -2.962675 | 1.56547   | 0.933795  |
| 28 | 6 | -3.788613 | 1.957624  | 1.832714  |
| 29 | 8 | -4.231966 | 3.12142   | 1.902606  |
| 30 | 6 | -4.228366 | 0.920754  | 2.860183  |
| 31 | 1 | -4.961715 | 1.336799  | 3.551023  |
| 32 | 1 | -3.358533 | 0.569271  | 3.421621  |
| 33 | 1 | -4.643408 | 0.056678  | 2.337594  |
| 34 | 6 | 4.866194  | -1.579966 | 2.032139  |
| 35 | 1 | 4.287704  | -1.72067  | 2.939082  |
| 36 | 6 | 4.209496  | -1.647956 | 0.792705  |
| 37 | 8 | 2.882882  | -1.890131 | 0.77511   |
| 38 | 6 | 4.969176  | -1.454234 | -0.372558 |
| 39 | 1 | 4.47664   | -1.496113 | -1.337078 |
| 40 | 6 | 6.339552  | -1.206157 | -0.286511 |
| 41 | 1 | 6.901605  | -1.056769 | -1.204077 |
| 42 | 6 | 6.23451   | -1.331309 | 2.097861  |
| 43 | 6 | 7.004953  | -1.142184 | 0.942652  |
| 44 | 1 | 6.712817  | -1.281366 | 3.071978  |
| 45 | 6 | 8.495739  | -0.906015 | 1.022847  |
| 46 | 1 | 8.862758  | -0.380381 | 0.137882  |
| 47 | 1 | 9.049408  | -1.849446 | 1.093744  |
| 48 | 1 | 8.759182  | -0.311198 | 1.901545  |

|    |   |          |           |           |
|----|---|----------|-----------|-----------|
| 49 | 1 | 2.492076 | -1.938056 | -0.182594 |
|----|---|----------|-----------|-----------|

**TS2c'**

E(B3LYP)= -2077.928341 Hartree

Zero-point correction= 0.334298 (Hartree/Particle)

Sum of electronic and zero-point Energies= -2077.594043 Hartree

Sum of electronic and thermal Enthalpies = -2077.558423 Hartree

Sum of electronic and thermal Free Energies= -2077.644680 Hartree

| Center<br>Number | Atomic<br>number | Coordinates(Angstroms) |           |           |
|------------------|------------------|------------------------|-----------|-----------|
|                  |                  | x                      | y         | z         |
| 1                | 92               | -1.72798               | -0.447256 | -0.042654 |
| 2                | 8                | -4.093165              | -1.08732  | 0.015658  |
| 3                | 8                | -2.67674               | -2.575078 | -0.737473 |
| 4                | 8                | 0.427622               | -2.326539 | -2.906826 |
| 5                | 8                | 0.115515               | -1.695728 | -0.77069  |
| 6                | 6                | -3.930358              | -2.292609 | -0.470825 |
| 7                | 6                | 0.865068               | -2.103594 | -1.755796 |
| 8                | 8                | 2.145748               | -2.293048 | -1.489431 |
| 9                | 8                | -4.87276               | -3.095818 | -0.662094 |
| 10               | 8                | -1.47549               | -1.124372 | 1.616723  |
| 11               | 8                | -1.986838              | 0.242565  | -1.694055 |
| 12               | 6                | 0.44967                | 2.229136  | -0.143138 |
| 13               | 6                | 1.144083               | 2.24458   | -1.373128 |
| 14               | 6                | 0.380893               | 3.450508  | 0.565514  |
| 15               | 6                | 1.729614               | 3.413574  | -1.85637  |
| 16               | 6                | 0.970122               | 4.6098    | 0.067115  |
| 17               | 6                | 1.660278               | 4.622242  | -1.152359 |
| 18               | 1                | 1.214428               | 1.324958  | -1.943887 |
| 19               | 1                | -0.14988               | 3.470701  | 1.511802  |
| 20               | 1                | 2.253069               | 3.382883  | -2.808467 |
| 21               | 1                | 0.888609               | 5.529127  | 0.641389  |
| 22               | 8                | -0.103374              | 1.127028  | 0.341837  |
| 23               | 6                | 2.326686               | 5.877359  | -1.667927 |
| 24               | 1                | 2.416035               | 5.861789  | -2.757267 |
| 25               | 1                | 1.762974               | 6.772096  | -1.389754 |
| 26               | 1                | 3.338445               | 5.994888  | -1.261769 |
| 27               | 8                | -2.993526              | 1.399582  | 0.875081  |
| 28               | 6                | -3.814922              | 1.766498  | 1.789825  |
| 29               | 8                | -4.292414              | 2.915523  | 1.865705  |
| 30               | 6                | -4.20321               | 0.717809  | 2.825258  |
| 31               | 1                | -4.947177              | 1.107597  | 3.519962  |
| 32               | 1                | -3.314579              | 0.405818  | 3.380526  |
| 33               | 1                | -4.585849              | -0.166022 | 2.311081  |



|    |   |          |           |           |
|----|---|----------|-----------|-----------|
| 34 | 6 | 4.939648 | -1.360676 | 2.027451  |
| 35 | 1 | 4.343    | -1.449481 | 2.930162  |
| 36 | 6 | 4.309129 | -1.58413  | 0.780864  |
| 37 | 8 | 3.022016 | -1.898513 | 0.728689  |
| 38 | 6 | 5.120142 | -1.44779  | -0.371368 |
| 39 | 1 | 4.673388 | -1.604406 | -1.347064 |
| 40 | 6 | 6.469885 | -1.113153 | -0.268    |
| 41 | 1 | 7.054778 | -1.01554  | -1.1793   |
| 42 | 6 | 6.289143 | -1.027934 | 2.110349  |
| 43 | 6 | 7.091212 | -0.897787 | 0.968141  |
| 44 | 1 | 6.729416 | -0.861908 | 3.090439  |
| 45 | 6 | 8.563637 | -0.56914  | 1.069005  |
| 46 | 1 | 8.770645 | 0.079793  | 1.924575  |
| 47 | 1 | 8.920268 | -0.060449 | 0.169348  |
| 48 | 1 | 9.175456 | -1.470795 | 1.194079  |
| 49 | 1 | 2.534068 | -2.067917 | -0.394339 |

### INT2c'

E(B3LYP)= -2077.92973 Hartree

Zero-point correction= 0.337425 (Hartree/Particle)

Sum of electronic and zero-point Energies= -2077.592305 Hartree

Sum of electronic and thermal Enthalpies = -2077.556085 Hartree

Sum of electronic and thermal Free Energies= -2077.645180 Hartree

| Center<br>Number | Atomic<br>number | Coordinates(Angstroms) |           |           |
|------------------|------------------|------------------------|-----------|-----------|
|                  |                  | x                      | y         | z         |
| 1                | 92               | -1.728878              | -0.513042 | -0.060594 |
| 2                | 8                | -3.917186              | -1.58833  | -0.031668 |
| 3                | 8                | -2.290448              | -2.687034 | -0.99715  |
| 4                | 8                | 0.597054               | -1.543704 | -3.16906  |
| 5                | 8                | 0.332144               | -1.355421 | -0.938971 |
| 6                | 6                | -3.561871              | -2.67607  | -0.671439 |
| 7                | 6                | 1.033332               | -1.511512 | -2.006235 |
| 8                | 8                | 2.363058               | -1.662401 | -1.83075  |
| 9                | 8                | -4.351925              | -3.608232 | -0.943148 |
| 10               | 8                | -1.295989              | -1.302187 | 1.506669  |
| 11               | 8                | -2.157504              | 0.288443  | -1.621081 |
| 12               | 6                | 0.080487               | 2.409787  | -0.00966  |
| 13               | 6                | 0.816308               | 2.53382   | -1.208441 |
| 14               | 6                | -0.165499              | 3.59525   | 0.71775   |
| 15               | 6                | 1.279679               | 3.774473  | -1.642279 |
| 16               | 6                | 0.305017               | 4.827207  | 0.269228  |
| 17               | 6                | 1.040548               | 4.948788  | -0.917023 |
| 18               | 1                | 1.015578               | 1.6412    | -1.791344 |

|    |   |           |           |           |
|----|---|-----------|-----------|-----------|
| 19 | 1 | -0.73678  | 3.528611  | 1.637908  |
| 20 | 1 | 1.84188   | 3.829425  | -2.570844 |
| 21 | 1 | 0.091998  | 5.716821  | 0.856166  |
| 22 | 8 | -0.352317 | 1.236752  | 0.432238  |
| 23 | 6 | 1.57991   | 6.284117  | -1.376707 |
| 24 | 1 | 1.662096  | 6.327249  | -2.465971 |
| 25 | 1 | 0.93553   | 7.106687  | -1.055101 |
| 26 | 1 | 2.579215  | 6.478741  | -0.969378 |
| 27 | 8 | -3.244185 | 0.980646  | 1.071862  |
| 28 | 6 | -4.075466 | 1.120694  | 2.041032  |
| 29 | 8 | -4.73668  | 2.158224  | 2.233924  |
| 30 | 6 | -4.2309   | -0.061798 | 2.989692  |
| 31 | 1 | -5.003371 | 0.131625  | 3.733832  |
| 32 | 1 | -3.28026  | -0.252385 | 3.495036  |
| 33 | 1 | -4.473534 | -0.95684  | 2.413883  |
| 34 | 6 | 5.227412  | -1.315963 | 1.946881  |
| 35 | 1 | 4.598933  | -1.459045 | 2.821567  |
| 36 | 6 | 4.607901  | -1.345284 | 0.665816  |
| 37 | 8 | 3.320723  | -1.540953 | 0.529912  |
| 38 | 6 | 5.482453  | -1.141173 | -0.440237 |
| 39 | 1 | 5.060321  | -1.145509 | -1.440525 |
| 40 | 6 | 6.848722  | -0.930633 | -0.26669  |
| 41 | 1 | 7.469922  | -0.775771 | -1.146317 |
| 42 | 6 | 6.595583  | -1.104003 | 2.099261  |
| 43 | 6 | 7.445525  | -0.908749 | 1.001431  |
| 44 | 1 | 7.0152    | -1.087918 | 3.102784  |
| 45 | 6 | 8.935576  | -0.715695 | 1.173999  |
| 46 | 1 | 9.169792  | -0.268449 | 2.14418   |
| 47 | 1 | 9.34719   | -0.062872 | 0.398677  |
| 48 | 1 | 9.483407  | -1.664728 | 1.117306  |
| 49 | 1 | 2.677426  | -1.592972 | -0.847742 |

### TS3c'

E(B3LYP)= -2077.913914 Hartree

Zero-point correction= 0.338081 (Hartree/Particle)

Sum of electronic and zero-point Energies= -2077.575834 Hartree

Sum of electronic and thermal Enthalpies = -2077.540232 Hartree

Sum of electronic and thermal Free Energies= -2077.628100 Hartree

| Center<br>Number | Atomic<br>number | Coordinates(Angstroms) |           |          |
|------------------|------------------|------------------------|-----------|----------|
|                  |                  | x                      | y         | z        |
| 1                | 92               | 0.525441               | -1.099695 | 0.261625 |
| 2                | 8                | 0.322228               | -3.214562 | 1.386345 |
| 3                | 8                | -1.388527              | -1.855588 | 1.503354 |

|    |   |           |           |           |
|----|---|-----------|-----------|-----------|
| 4  | 8 | -1.47545  | 4.41747   | 3.026569  |
| 5  | 8 | -2.254953 | 2.300486  | 3.051893  |
| 6  | 6 | -0.894824 | -3.024543 | 1.846809  |
| 7  | 6 | -1.765735 | 3.316392  | 2.493573  |
| 8  | 8 | -1.506106 | 3.242808  | 1.13978   |
| 9  | 8 | -1.51236  | -3.86183  | 2.533684  |
| 10 | 8 | -0.134969 | -1.84081  | -1.240981 |
| 11 | 8 | 1.195672  | -0.359367 | 1.759245  |
| 12 | 6 | 2.195177  | 1.664843  | -0.882554 |
| 13 | 6 | 1.775238  | 2.885912  | -0.315982 |
| 14 | 6 | 3.487516  | 1.614344  | -1.441384 |
| 15 | 6 | 2.618354  | 3.99532   | -0.316155 |
| 16 | 6 | 4.31651   | 2.734954  | -1.430393 |
| 17 | 6 | 3.905656  | 3.949537  | -0.867966 |
| 18 | 1 | 0.782268  | 2.954818  | 0.116053  |
| 19 | 1 | 3.825592  | 0.685678  | -1.888447 |
| 20 | 1 | 2.2619    | 4.923064  | 0.123838  |
| 21 | 1 | 5.30567   | 2.661226  | -1.874118 |
| 22 | 8 | 1.394718  | 0.599147  | -0.918577 |
| 23 | 6 | 4.819544  | 5.153125  | -0.831092 |
| 24 | 1 | 5.587507  | 5.091856  | -1.606043 |
| 25 | 1 | 4.263569  | 6.082863  | -0.980039 |
| 26 | 1 | 5.335812  | 5.238334  | 0.132436  |
| 27 | 8 | 2.597866  | -2.123449 | -0.095911 |
| 28 | 6 | 3.355744  | -2.695191 | -0.973752 |
| 29 | 8 | 3.298601  | -2.502394 | -2.194572 |
| 30 | 6 | 4.38347   | -3.656079 | -0.388618 |
| 31 | 1 | 5.023328  | -3.124226 | 0.320351  |
| 32 | 1 | 4.998036  | -4.099637 | -1.171405 |
| 33 | 1 | 3.872867  | -4.44707  | 0.166964  |
| 34 | 6 | -3.406924 | -0.275874 | -1.670182 |
| 35 | 1 | -2.559776 | -0.907803 | -1.917977 |
| 36 | 6 | -3.191606 | 0.801876  | -0.763933 |
| 37 | 8 | -2.018704 | 1.051054  | -0.24203  |
| 38 | 6 | -4.341366 | 1.59451   | -0.477019 |
| 39 | 1 | -4.232287 | 2.435019  | 0.201675  |
| 40 | 6 | -5.58376  | 1.32359   | -1.046205 |
| 41 | 1 | -6.426226 | 1.963653  | -0.792313 |
| 42 | 6 | -4.657619 | -0.529562 | -2.228134 |
| 43 | 6 | -5.781133 | 0.256026  | -1.932765 |
| 44 | 1 | -4.764084 | -1.366678 | -2.915093 |
| 45 | 6 | -7.143923 | -0.055959 | -2.509453 |
| 46 | 1 | -7.744922 | 0.850263  | -2.629301 |
| 47 | 1 | -7.716782 | -0.73714  | -1.867498 |
| 48 | 1 | -7.063256 | -0.533621 | -3.490188 |

|    |   |           |          |          |
|----|---|-----------|----------|----------|
| 49 | 1 | -1.775782 | 2.358241 | 0.742444 |
|----|---|-----------|----------|----------|

### INT3c'

E(B3LYP)= -2077.933304 Hartree

Zero-point correction= 0.338958 (Hartree/Particle)

Sum of electronic and zero-point Energies= -2077.594346 Hartree

Sum of electronic and thermal Enthalpies = -2077.55802 Hartree

Sum of electronic and thermal Free Energies= -2077.646820 Hartree

| Center<br>Number | Atomic<br>number | Coordinates(Angstroms) |           |           |
|------------------|------------------|------------------------|-----------|-----------|
|                  |                  | x                      | y         | z         |
| 1                | 92               | 0.198032               | -1.088876 | 0.069984  |
| 2                | 8                | 0.248061               | -3.433029 | 0.788896  |
| 3                | 8                | -1.652834              | -2.372588 | 1.013436  |
| 4                | 8                | -1.78729               | 3.243202  | 4.105098  |
| 5                | 8                | -2.30993               | 1.093028  | 3.650343  |
| 6                | 6                | -1.002872              | -3.500316 | 1.173772  |
| 7                | 6                | -1.880201              | 2.236923  | 3.364832  |
| 8                | 8                | -1.443468              | 2.440145  | 2.0585    |
| 9                | 8                | -1.525671              | -4.536351 | 1.648044  |
| 10               | 8                | -0.307544              | -1.627985 | -1.579753 |
| 11               | 8                | 0.678819               | -0.540338 | 1.725132  |
| 12               | 6                | 2.105979               | 1.720626  | -0.665611 |
| 13               | 6                | 1.769362               | 2.792076  | 0.192564  |
| 14               | 6                | 3.343529               | 1.806437  | -1.342338 |
| 15               | 6                | 2.628591               | 3.877194  | 0.355787  |
| 16               | 6                | 4.190321               | 2.898528  | -1.164451 |
| 17               | 6                | 3.85794                | 3.958655  | -0.311239 |
| 18               | 1                | 0.823218               | 2.763223  | 0.722619  |
| 19               | 1                | 3.622659               | 1.001351  | -2.014442 |
| 20               | 1                | 2.331978               | 4.684298  | 1.020986  |
| 21               | 1                | 5.132124               | 2.927347  | -1.706393 |
| 22               | 8                | 1.295316               | 0.690876  | -0.858738 |
| 23               | 6                | 4.796036               | 5.124822  | -0.097255 |
| 24               | 1                | 5.425735               | 5.29595   | -0.97438  |
| 25               | 1                | 4.246                  | 6.047568  | 0.106601  |
| 26               | 1                | 5.4663                 | 4.954609  | 0.753778  |
| 27               | 8                | 2.477312               | -1.935515 | -0.165006 |
| 28               | 6                | 3.331325               | -2.446098 | -0.971069 |
| 29               | 8                | 3.138755               | -2.688249 | -2.177383 |
| 30               | 6                | 4.685442               | -2.78175  | -0.344441 |
| 31               | 1                | 5.059035               | -1.931267 | 0.230508  |
| 32               | 1                | 5.41527                | -3.062834 | -1.103893 |
| 33               | 1                | 4.561587               | -3.615636 | 0.353141  |

|    |   |           |          |           |
|----|---|-----------|----------|-----------|
| 34 | 6 | -2.416703 | 1.161436 | -1.974705 |
| 35 | 1 | -1.403097 | 1.229976 | -2.353314 |
| 36 | 6 | -2.614333 | 0.7234   | -0.647969 |
| 37 | 8 | -1.595166 | 0.413702 | 0.15442   |
| 38 | 6 | -3.945878 | 0.657282 | -0.186322 |
| 39 | 1 | -4.126521 | 0.330598 | 0.832356  |
| 40 | 6 | -5.013956 | 1.003138 | -1.012478 |
| 41 | 1 | -6.024987 | 0.939646 | -0.618672 |
| 42 | 6 | -3.495262 | 1.503066 | -2.787906 |
| 43 | 6 | -4.817866 | 1.430354 | -2.331546 |
| 44 | 1 | -3.301519 | 1.838636 | -3.803464 |
| 45 | 6 | -5.982547 | 1.770113 | -3.233425 |
| 46 | 1 | -6.840652 | 2.127853 | -2.658434 |
| 47 | 1 | -6.318097 | 0.897542 | -3.806417 |
| 48 | 1 | -5.714569 | 2.545811 | -3.955771 |
| 49 | 1 | -1.537708 | 1.61142  | 1.535563  |

### Prod'

E(B3LYP)= -1813.27556 Hartree

Zero-point correction= 0.310917 (Hartree/Particle)

Sum of electronic and zero-point Energies= -1812.964644 Hartree

Sum of electronic and thermal Enthalpies = -1812.933234 Hartree

Sum of electronic and thermal Free Energies= -1813.012270 Hartree

| Center<br>Number | Atomic<br>number | Coordinates(Angstroms) |           |           |
|------------------|------------------|------------------------|-----------|-----------|
|                  |                  | x                      | y         | z         |
| 1                | 92               | -0.061494              | -0.957344 | -0.166336 |
| 2                | 8                | -0.011163              | -3.389718 | -0.503225 |
| 3                | 8                | 1.780872               | -2.277568 | -1.087342 |
| 4                | 6                | 1.199204               | -3.449766 | -1.000508 |
| 5                | 8                | 1.748062               | -4.519002 | -1.358849 |
| 6                | 8                | 0.610911               | -1.198238 | 1.497364  |
| 7                | 8                | -0.738083              | -0.727886 | -1.832352 |
| 8                | 6                | -1.939412              | 1.931435  | 0.177777  |
| 9                | 6                | -1.59706               | 2.743941  | -0.927454 |
| 10               | 6                | -3.111747              | 2.280543  | 0.886578  |
| 11               | 6                | -2.385484              | 3.832989  | -1.293163 |
| 12               | 6                | -3.889156              | 3.372103  | 0.505412  |
| 13               | 6                | -3.549882              | 4.173756  | -0.592397 |
| 14               | 1                | -0.697819              | 2.507528  | -1.485412 |
| 15               | 1                | -3.394982              | 1.680612  | 1.745592  |
| 16               | 1                | -2.083501              | 4.435801  | -2.145929 |
| 17               | 1                | -4.781451              | 3.607471  | 1.079871  |
| 18               | 8                | -1.19406               | 0.907071  | 0.559907  |

|    |   |           |           |           |
|----|---|-----------|-----------|-----------|
| 19 | 6 | -4.415737 | 5.337197  | -1.019276 |
| 20 | 1 | -4.961901 | 5.7594    | -0.171643 |
| 21 | 1 | -3.818219 | 6.136766  | -1.465613 |
| 22 | 1 | -5.160239 | 5.036264  | -1.766033 |
| 23 | 8 | -2.243721 | -1.882109 | 0.446854  |
| 24 | 6 | -3.01301  | -2.22756  | 1.410469  |
| 25 | 8 | -2.776051 | -2.072    | 2.623276  |
| 26 | 6 | -4.326293 | -2.88187  | 0.978417  |
| 27 | 1 | -4.874535 | -2.209029 | 0.313595  |
| 28 | 1 | -4.949153 | -3.129452 | 1.837984  |
| 29 | 1 | -4.113476 | -3.792623 | 0.411793  |
| 30 | 6 | 2.809004  | 1.687354  | 1.123497  |
| 31 | 1 | 1.932606  | 1.685681  | 1.762202  |
| 32 | 6 | 2.712812  | 1.106066  | -0.161547 |
| 33 | 8 | 1.590477  | 0.573042  | -0.615821 |
| 34 | 6 | 3.876976  | 1.14149   | -0.963746 |
| 35 | 1 | 3.83072   | 0.713246  | -1.959976 |
| 36 | 6 | 5.060148  | 1.710876  | -0.498753 |
| 37 | 1 | 5.931693  | 1.715761  | -1.148343 |
| 38 | 6 | 4.000396  | 2.254321  | 1.572172  |
| 39 | 6 | 5.155016  | 2.277328  | 0.77932   |
| 40 | 1 | 4.030683  | 2.691854  | 2.566845  |
| 41 | 6 | 6.453186  | 2.859112  | 1.290905  |
| 42 | 1 | 7.051898  | 3.276862  | 0.476968  |
| 43 | 1 | 7.06925   | 2.099893  | 1.787524  |
| 44 | 1 | 6.274187  | 3.654952  | 2.018765  |

### U-3CO<sub>3</sub>-Asp\*

E(B3LYP)= -1648.761224 Hartree

Zero-point correction= 0.101943 (Hartree/Particle)

Sum of electronic and zero-point Energies= -1648.659281 Hartree

Sum of electronic and thermal Enthalpies = -1648.63647 Hartree

Sum of electronic and thermal Free Energies= -1648.692640 Hartree

| Center<br>Number | Atomic<br>number | Coordinates(Angstroms) |           |           |
|------------------|------------------|------------------------|-----------|-----------|
|                  |                  | x                      | y         | z         |
| 1                | 92               | -0.286215              | -0.127578 | 0.084094  |
| 2                | 8                | 1.202608               | -1.833627 | 0.023007  |
| 3                | 8                | -2.156632              | 3.207063  | -1.344767 |
| 4                | 8                | 1.410615               | -3.757213 | -1.113714 |
| 5                | 8                | -0.883655              | 2.059972  | 0.105981  |
| 6                | 8                | -1.723937              | -2.11759  | 0.293338  |
| 7                | 8                | -2.748529              | -0.183229 | 0.314171  |
| 8                | 6                | -1.186606              | 3.205961  | -0.522388 |

|    |   |           |           |           |
|----|---|-----------|-----------|-----------|
| 9  | 6 | 1.97073   | -2.726922 | -0.62071  |
| 10 | 6 | -2.867482 | -1.48489  | 0.377365  |
| 11 | 8 | -3.971228 | -2.072841 | 0.505962  |
| 12 | 8 | 3.220037  | -2.494123 | -0.682052 |
| 13 | 8 | -0.48546  | 4.231153  | -0.242464 |
| 14 | 8 | -0.444048 | -0.190613 | -1.724924 |
| 15 | 8 | -0.127243 | -0.074127 | 1.896209  |
| 16 | 8 | 1.849819  | 1.066136  | -0.255083 |
| 17 | 6 | 2.956694  | 1.461038  | 0.243331  |
| 18 | 8 | 3.81865   | 2.106771  | -0.391052 |
| 19 | 6 | 3.241935  | 1.085777  | 1.696564  |
| 20 | 1 | 3.625889  | 0.060417  | 1.71825   |
| 21 | 1 | 2.329951  | 1.105598  | 2.293998  |
| 22 | 1 | 3.996347  | 1.743552  | 2.129228  |

### U-3CO<sub>3</sub>-Asp\*(hexa-coor)

E(B3LYP)= -1648.74935 Hartree

Zero-point correction= 0.102279 (Hartree/Particle)

Sum of electronic and zero-point Energies= -1648.647071 Hartree

Sum of electronic and thermal Enthalpies = -1648.624257 Hartree

Sum of electronic and thermal Free Energies= -1648.68009 Hartree

| Center<br>Number | Atomic<br>number | Coordinates(Angstroms) |           |           |
|------------------|------------------|------------------------|-----------|-----------|
|                  |                  | x                      | y         | z         |
| 1                | 92               | -0.234224              | -0.358958 | -0.001024 |
| 2                | 8                | 0.397799               | -2.788118 | -0.152319 |
| 3                | 8                | -1.147444              | 3.298156  | -1.505325 |
| 4                | 8                | 2.483309               | -3.575834 | -0.513541 |
| 5                | 8                | -0.777023              | 1.883451  | 0.202598  |
| 6                | 8                | -2.053726              | -2.044642 | 0.27561   |
| 7                | 8                | -2.690292              | 0.034412  | 0.399943  |
| 8                | 6                | -0.962321              | 3.111656  | -0.253232 |
| 9                | 6                | 1.67221                | -2.620121 | -0.363213 |
| 10               | 6                | -3.050357              | -1.217975 | 0.43299   |
| 11               | 8                | -4.243111              | -1.594832 | 0.600817  |
| 12               | 8                | 2.029779               | -1.366328 | -0.402436 |
| 13               | 8                | -0.955388              | 4.071558  | 0.597212  |
| 14               | 8                | -0.527531              | -0.365605 | -1.791714 |
| 15               | 8                | 0.075291               | -0.428388 | 1.786121  |
| 16               | 8                | 1.773386               | 1.256971  | -0.38531  |
| 17               | 6                | 2.835117               | 1.698449  | 0.138045  |
| 18               | 8                | 3.746039               | 2.301533  | -0.491567 |
| 19               | 6                | 3.048711               | 1.487185  | 1.641426  |
| 20               | 1                | 3.767329               | 0.672993  | 1.782119  |

|    |   |          |          |          |
|----|---|----------|----------|----------|
| 21 | 1 | 2.124539 | 1.217272 | 2.151423 |
| 22 | 1 | 3.480265 | 2.384365 | 2.090944 |

### U-2CO<sub>3</sub>-Asp\*

E(B3LYP)= -1460.581062 Hartree

Zero-point correction= 0.098772 (Hartree/Particle)

Sum of electronic and zero-point Energies= -1460.48229 Hartree

Sum of electronic and thermal Enthalpies = -1460.461705 Hartree

Sum of electronic and thermal Free Energies= -1460.50834 Hartree

| Center<br>Number | Atomic<br>number | Coordinates(Angstroms) |           |           |
|------------------|------------------|------------------------|-----------|-----------|
|                  |                  | x                      | y         | z         |
| 1                | 92               | -0.378206              | -0.370963 | -0.068669 |
| 2                | 8                | -2.791513              | -0.714043 | 0.332621  |
| 3                | 8                | -2.166622              | 1.341038  | -0.092871 |
| 4                | 8                | 1.006131               | 3.331719  | 0.80412   |
| 5                | 8                | 0.713094               | 1.567968  | -0.556234 |
| 6                | 6                | -3.161574              | 0.531063  | 0.166955  |
| 7                | 6                | 1.400758               | 2.663905  | -0.204231 |
| 8                | 8                | 2.410385               | 2.975508  | -0.91598  |
| 9                | 8                | -4.35756               | 0.910935  | 0.248385  |
| 10               | 8                | -0.656721              | -0.674592 | -1.842321 |
| 11               | 8                | -0.115969              | -0.132665 | 1.713418  |
| 12               | 8                | -0.555101              | -2.598143 | 0.330648  |
| 13               | 1                | -0.761972              | -3.157471 | -0.424249 |
| 14               | 8                | 1.959097               | -1.128553 | -0.367015 |
| 15               | 6                | 3.155741               | -1.067117 | 0.07843   |
| 16               | 8                | 4.128531               | -1.640232 | -0.456817 |
| 17               | 6                | 3.385882               | -0.227822 | 1.333427  |
| 18               | 1                | 3.198824               | 0.823297  | 1.09776   |
| 19               | 1                | 4.406872               | -0.338192 | 1.699122  |
| 20               | 1                | 2.676416               | -0.51075  | 2.113781  |

### U-2CO<sub>3</sub>-Asp\*(hexa-coor)

E(B3LYP)= -1460.573942 Hartree

Zero-point correction= 0.099696 (Hartree/Particle)

Sum of electronic and zero-point Energies= -1460.474246 Hartree

Sum of electronic and thermal Enthalpies = -1460.453974 Hartree

Sum of electronic and thermal Free Energies= -1460.50212 Hartree

| Center<br>Number | Atomic<br>number | Coordinates(Angstroms) |           |           |
|------------------|------------------|------------------------|-----------|-----------|
|                  |                  | x                      | y         | z         |
| 1                | 92               | -0.352679              | -0.032207 | -0.156685 |
| 2                | 8                | -2.659164              | -1.061305 | 0.262521  |



|    |   |           |           |           |
|----|---|-----------|-----------|-----------|
| 3  | 8 | -2.576372 | 1.093327  | -0.06336  |
| 4  | 8 | -0.370848 | 2.439134  | -0.590607 |
| 5  | 8 | 1.589007  | 1.480872  | -0.602522 |
| 6  | 6 | -3.328321 | 0.058193  | 0.182956  |
| 7  | 6 | 0.915897  | 2.589346  | -0.742156 |
| 8  | 8 | 1.457822  | 3.699847  | -0.999001 |
| 9  | 8 | -4.578586 | 0.128145  | 0.330595  |
| 10 | 8 | -0.563283 | -0.287943 | -1.946413 |
| 11 | 8 | -0.162708 | 0.295321  | 1.62174   |
| 12 | 8 | -0.385165 | -2.32467  | 0.23228   |
| 13 | 1 | -1.319752 | -2.509622 | 0.377574  |
| 14 | 8 | 1.932611  | -1.145417 | -0.350184 |
| 15 | 6 | 3.134346  | -1.147118 | 0.052857  |
| 16 | 8 | 4.098786  | -1.633084 | -0.5915   |
| 17 | 6 | 3.414178  | -0.519928 | 1.419696  |
| 18 | 1 | 3.15935   | 0.540883  | 1.374509  |
| 19 | 1 | 4.460414  | -0.63561  | 1.705299  |
| 20 | 1 | 2.776894  | -0.975813 | 2.181589  |

---
